# Supplementary material for: Highly enantio- and diastereoselective Michael addition of cyclohexanone to nitroolefins catalyzed by a chiral glucose-based bifunctional secondary amine-thiourea catalyst
Source: Royal Society of Chemistry journal article supplement (doi:10.1039/b905306a), 2009-01-01
Supplement: b905306a.pdf [file b905306a.pdf]

## Highly enantio- and diastereoselective Michael addition of cyclohexanone to nitroolefins catalyzed by chiral glucose-based bifunctional secondary amine-thiourea catalyst

Aidang Lu, Peng Gao, Yang Wu, Youming Wang, Zhenghong Zhou\*, Chuchi Tang  
State Key Laboratory of Elemento-Organic Chemistry, Institute of Elemento-Organic Chemistry,  
Nankai University, Tianjin 300071, P. R. China  
E-mail: [z.h.zhou@nankai.edu.cn](mailto:z.h.zhou@nankai.edu.cn)

### Table of Contents

- |                                                                                                         |                   |
|---------------------------------------------------------------------------------------------------------|-------------------|
| 1. Copies of $^1\text{H}$ and $^{13}\text{C}$ NMR Spectra                                               | Page 1 — Page 25  |
| 2. HRMS and IR spectra of the prepared thiourea catalysts <b>3</b> and the new Michael addition adducts | Page 26 — Page 35 |
| 3. Copies of HPLC data                                                                                  | Page 36 — Page 75 |

### 1. Copies of $^1\text{H}$ and $^{13}\text{C}$ NMR Spectra

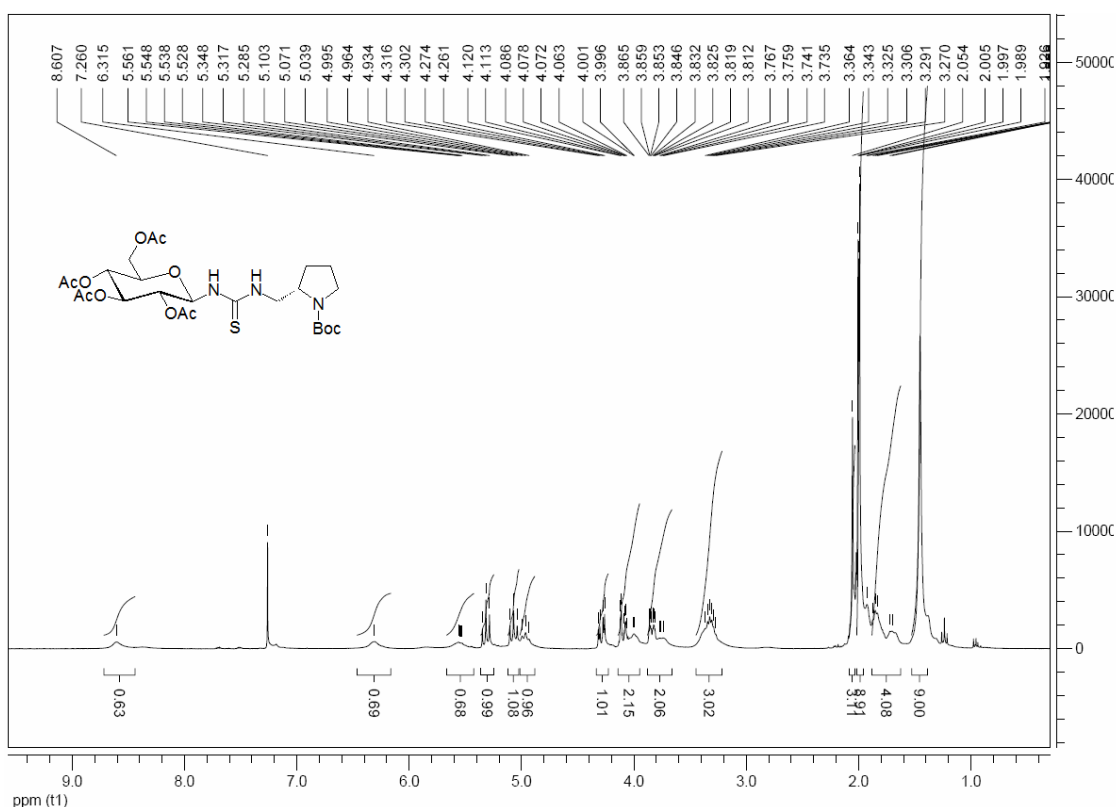

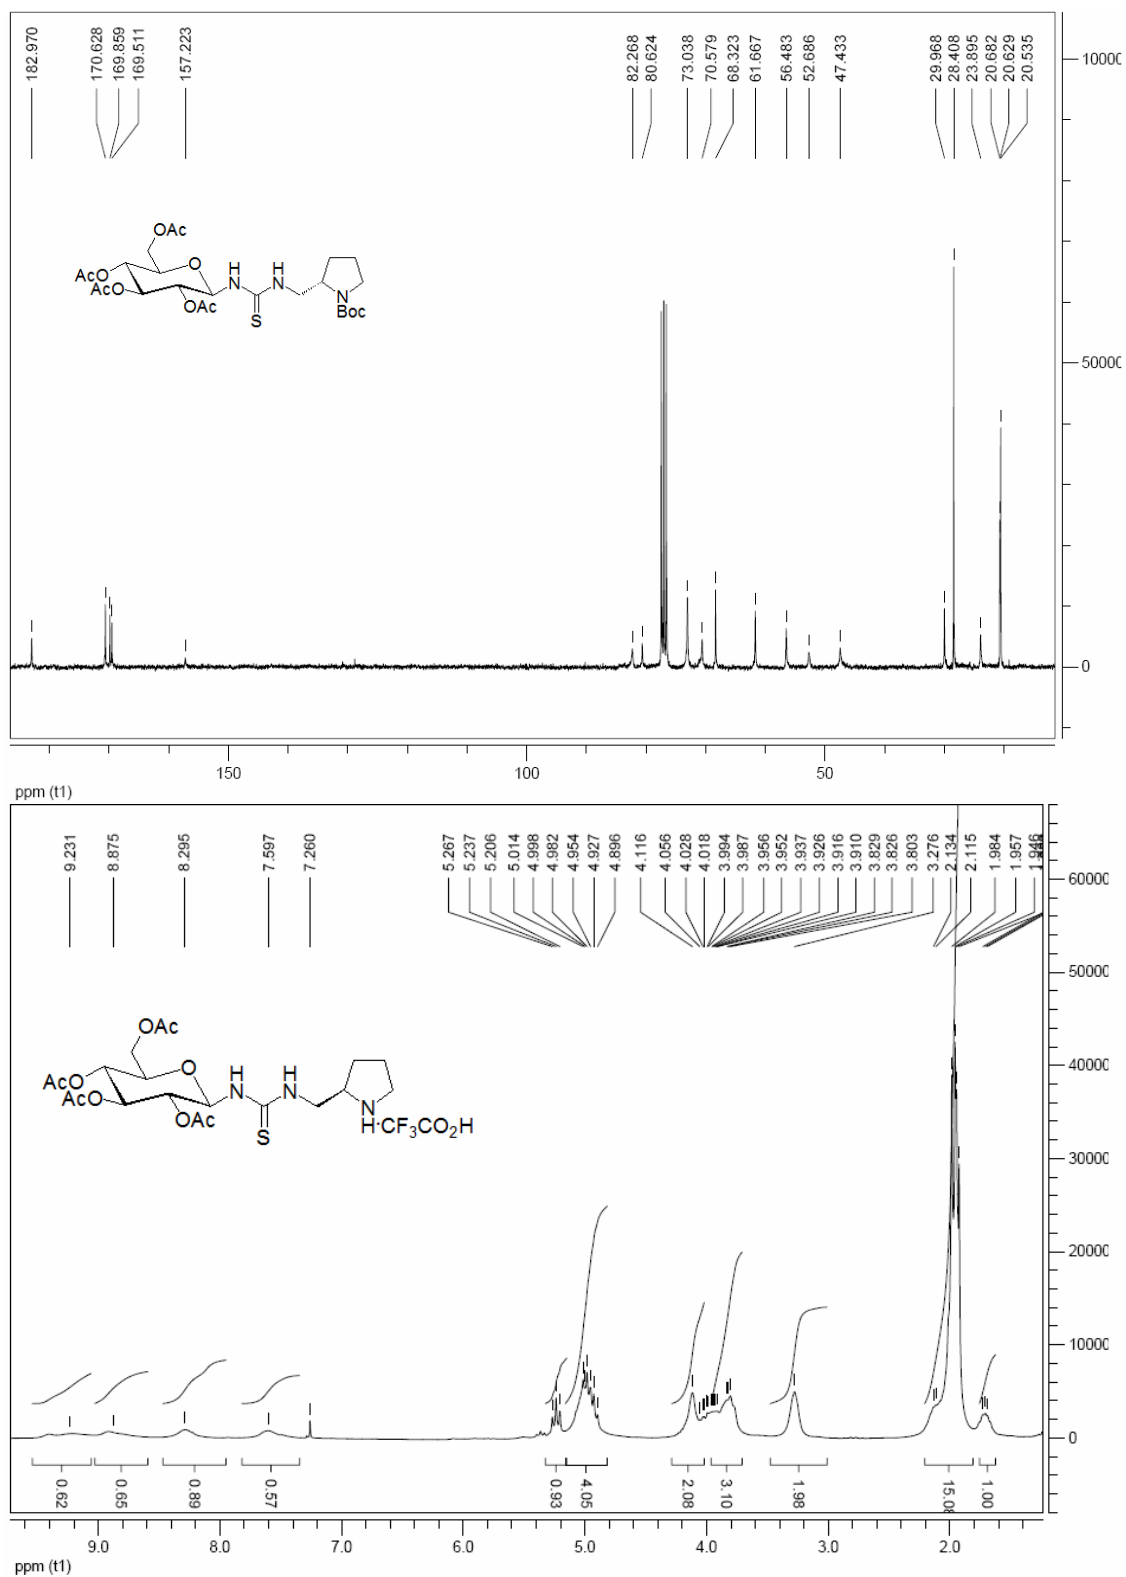

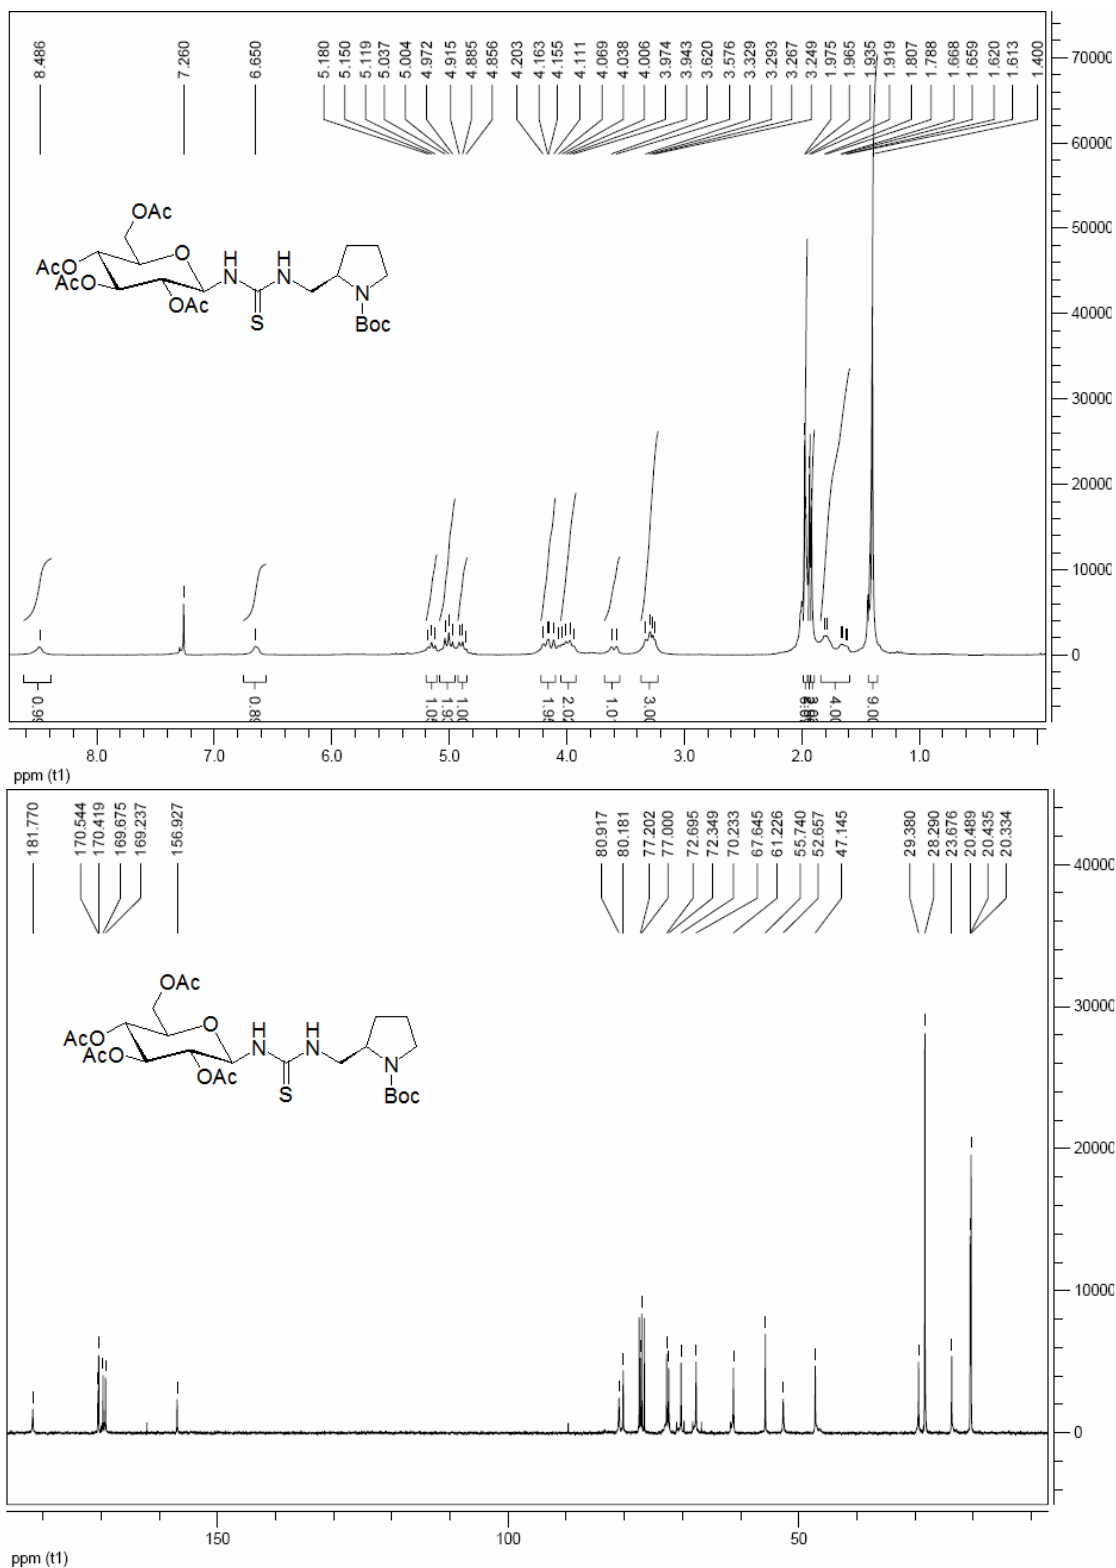

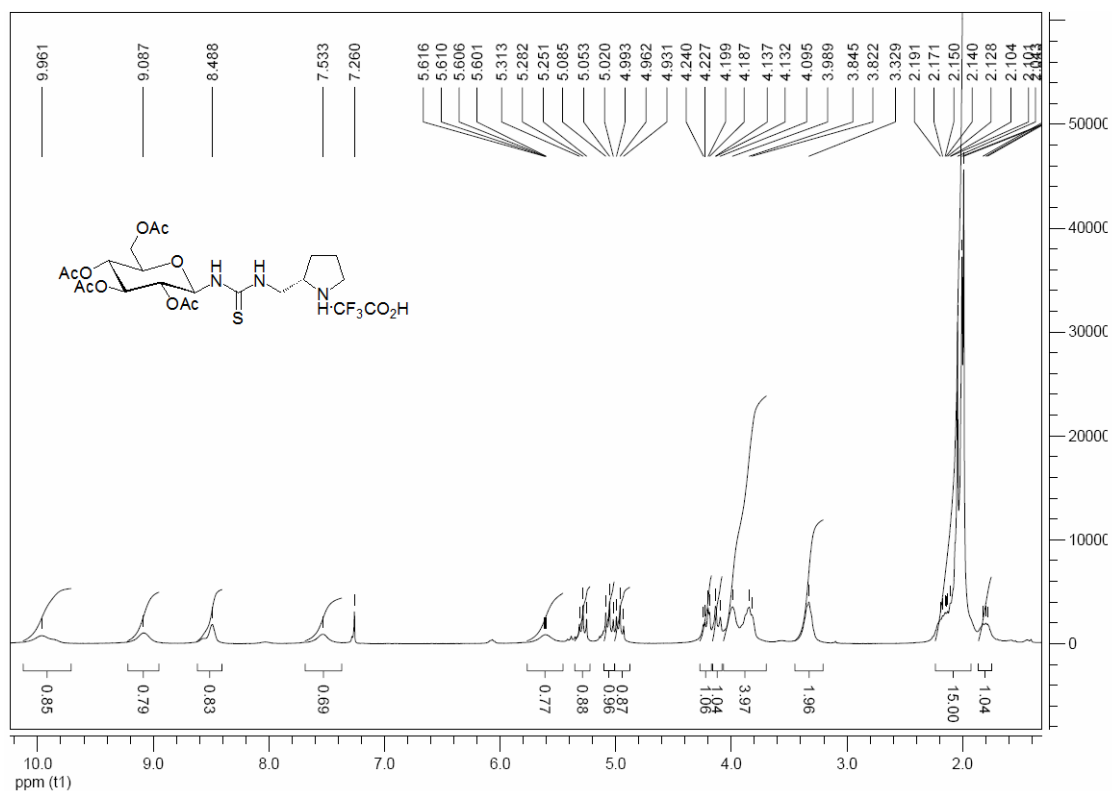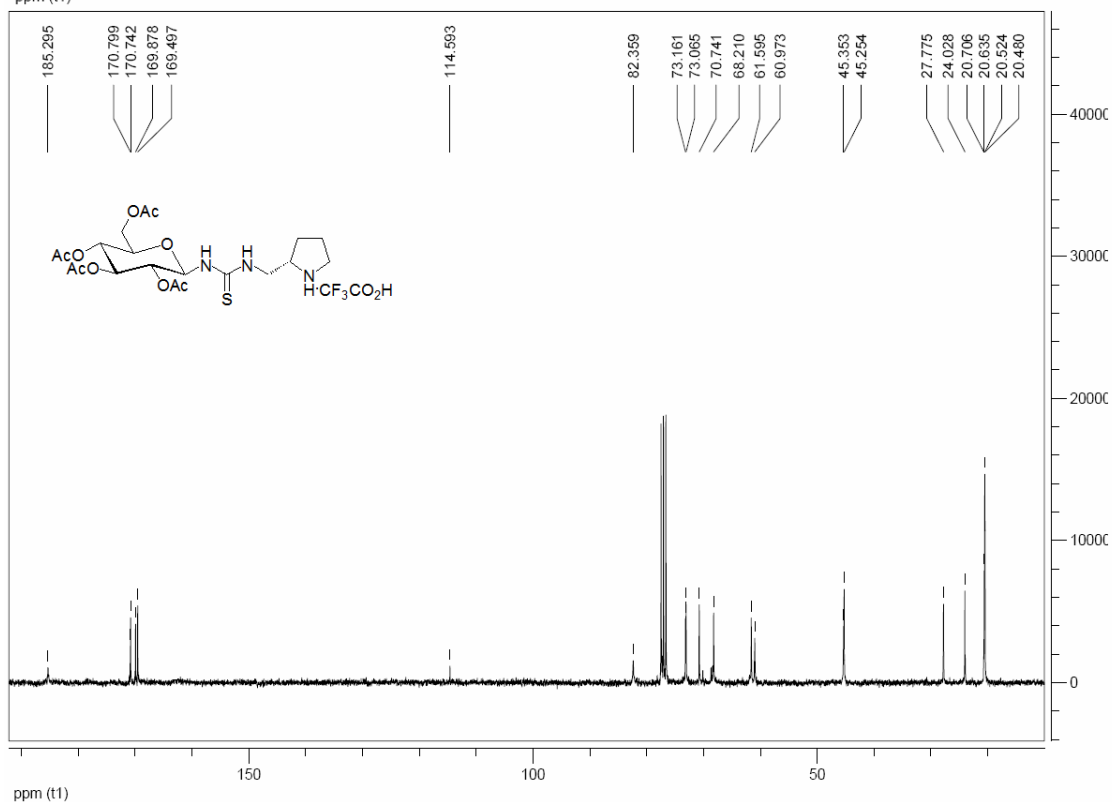

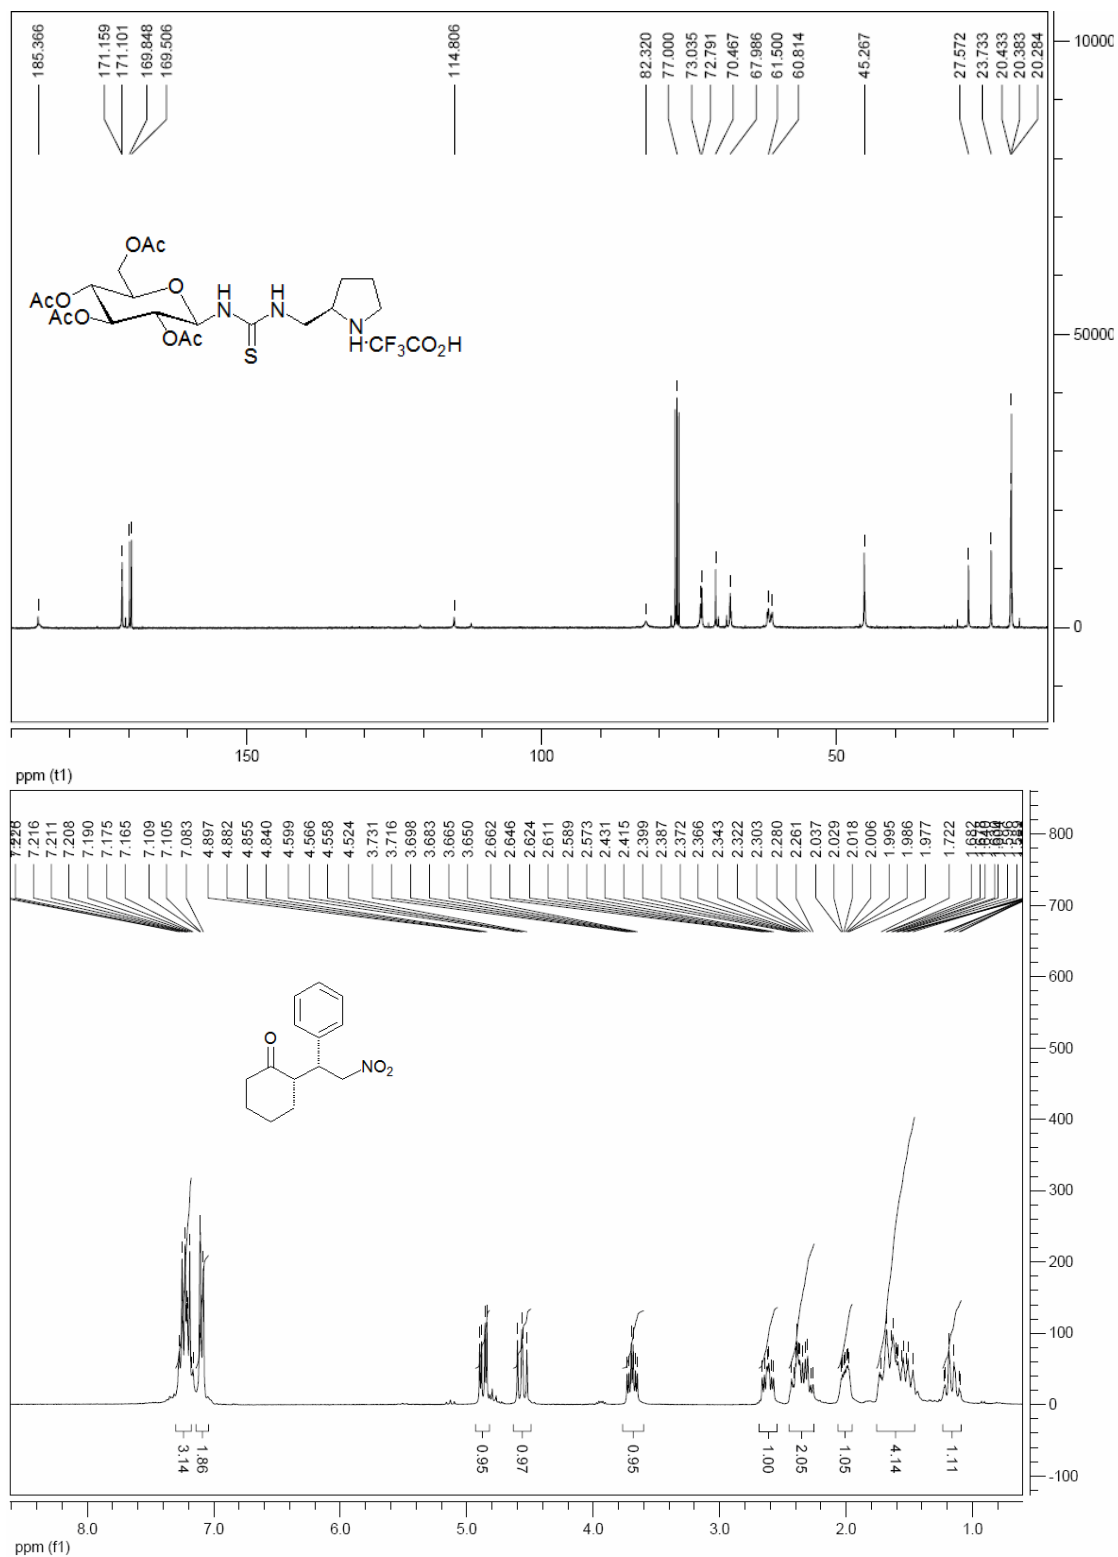

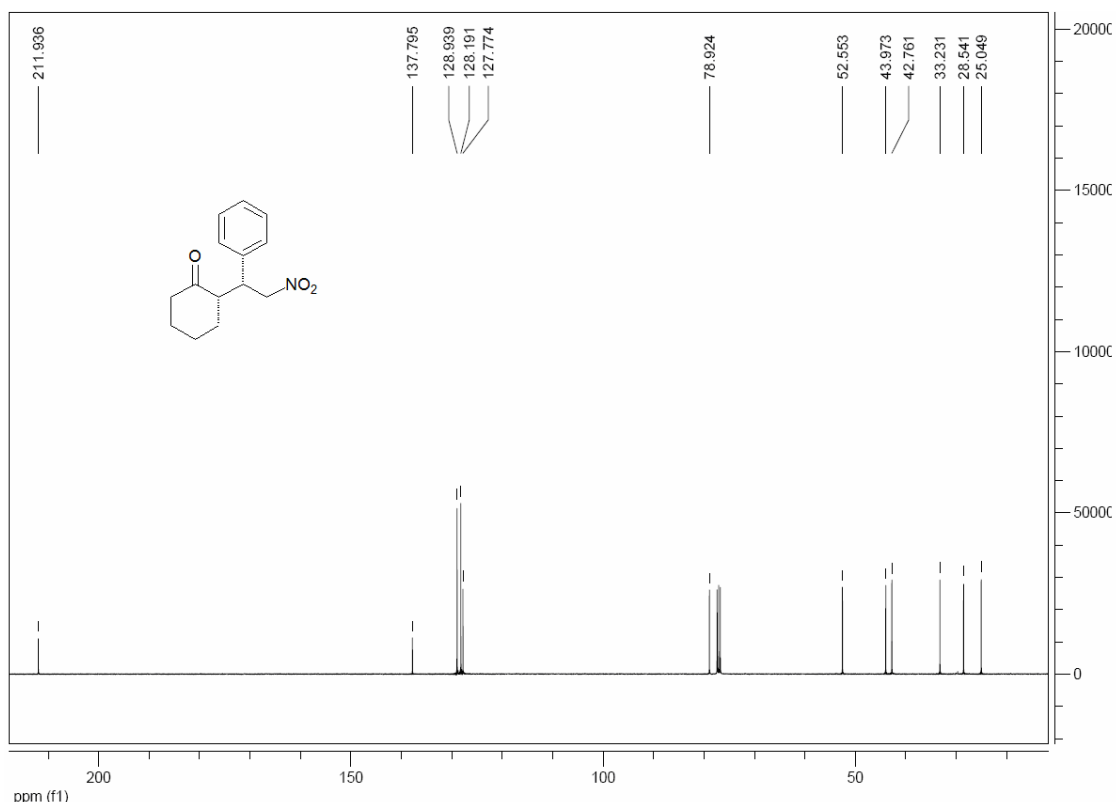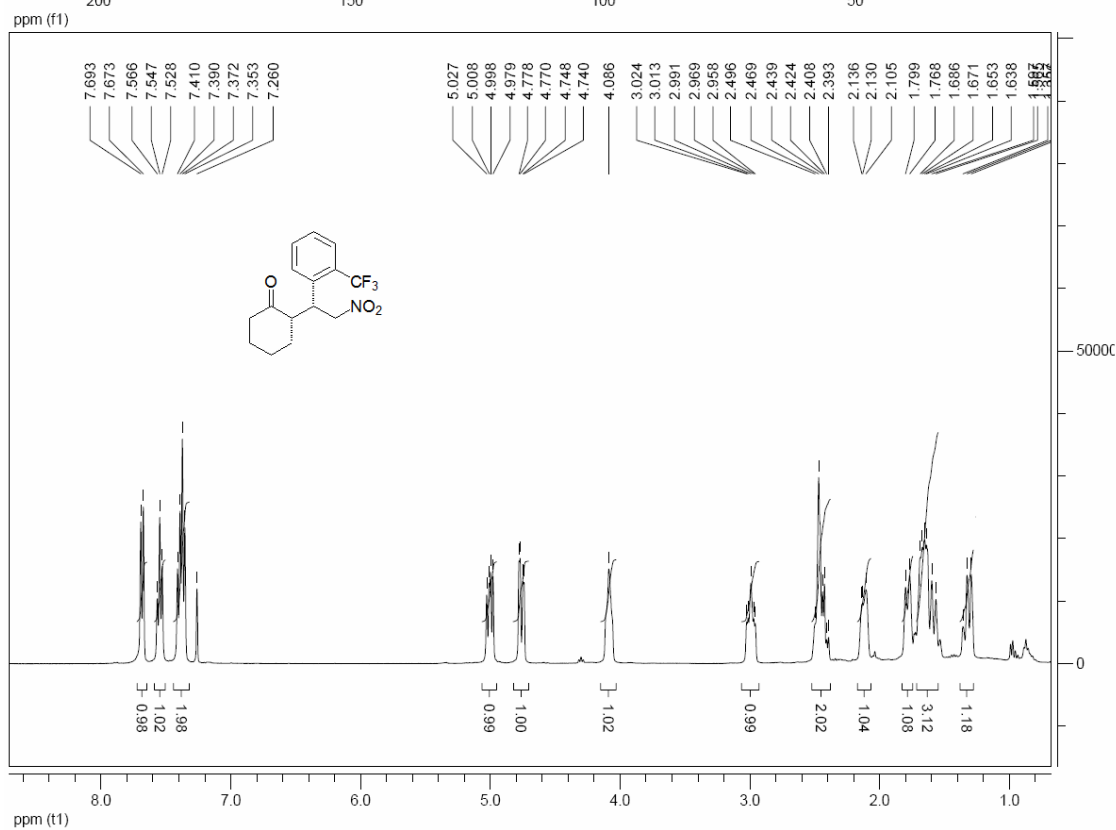

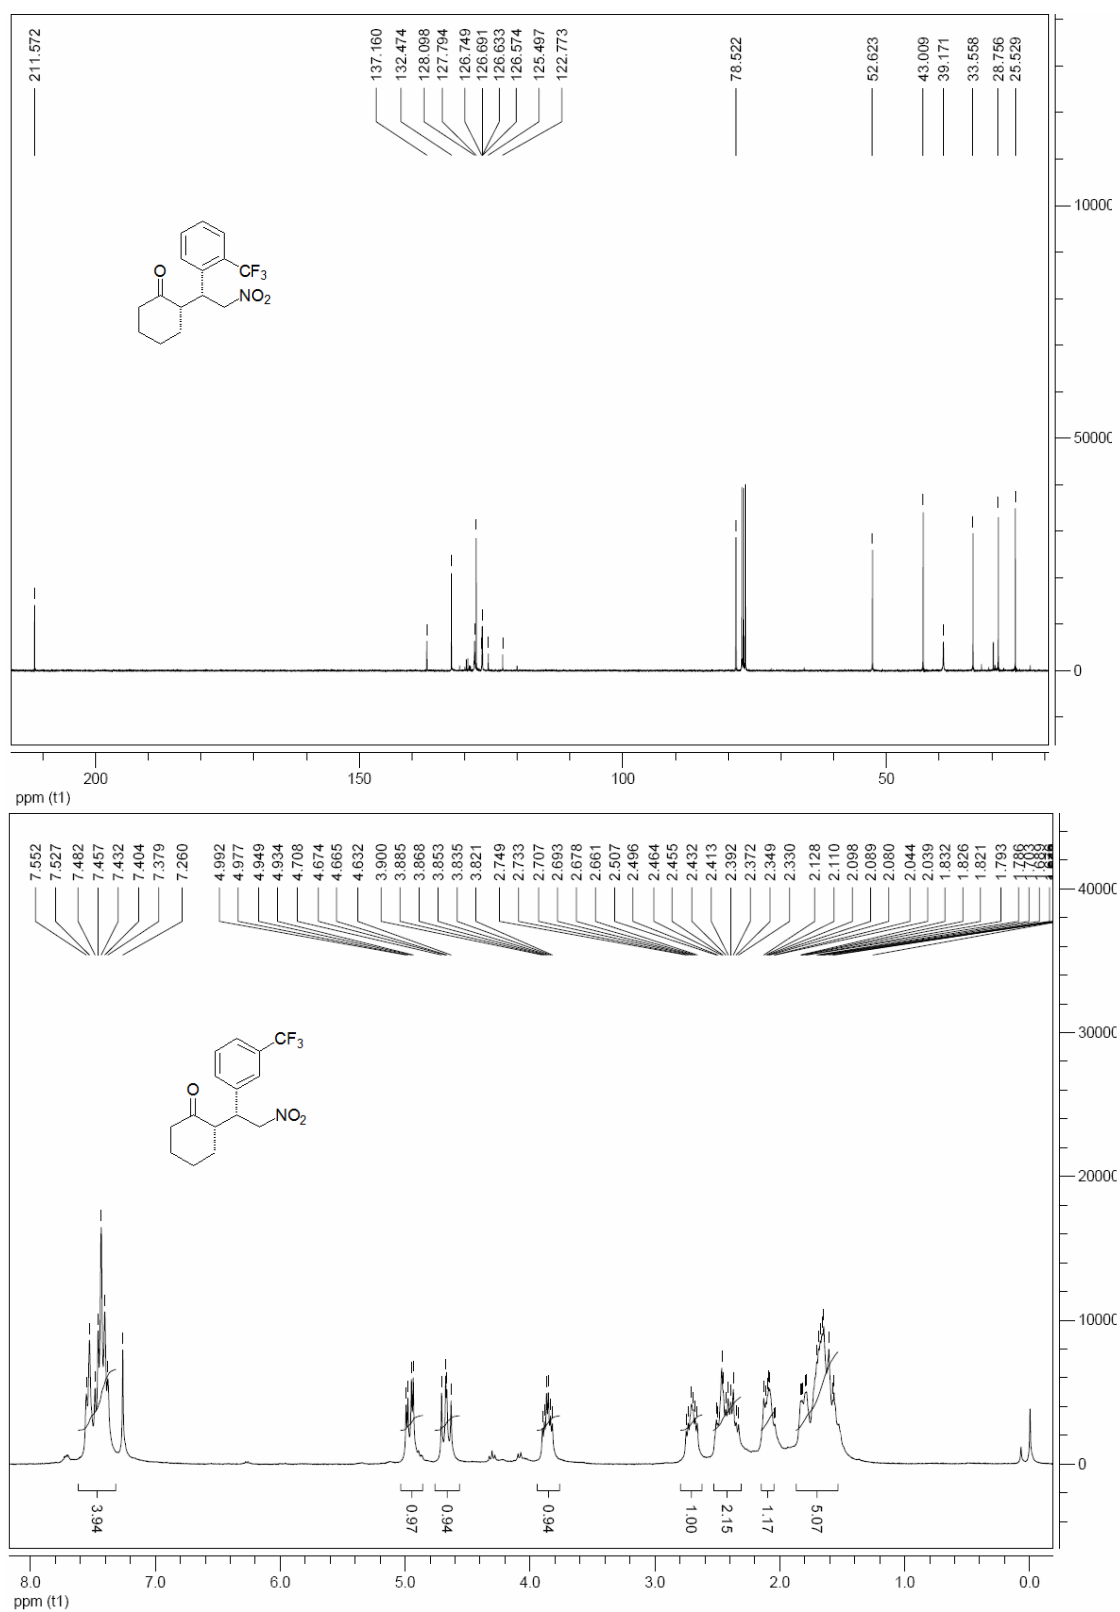

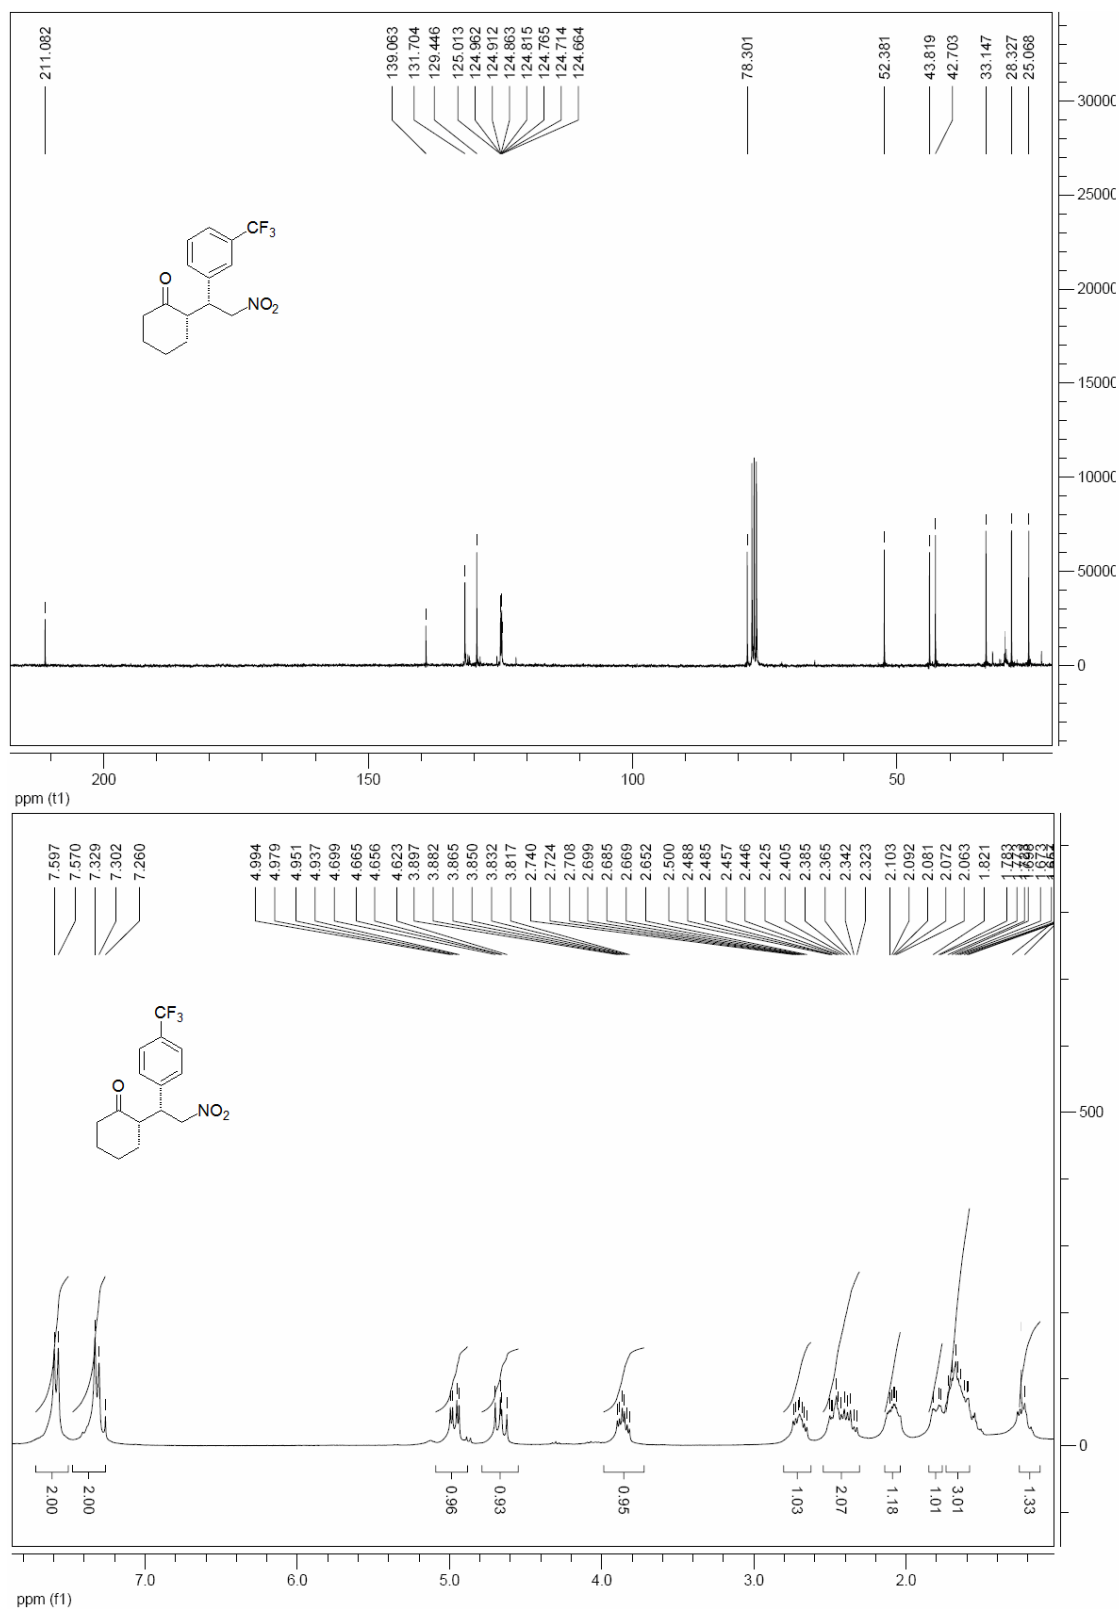



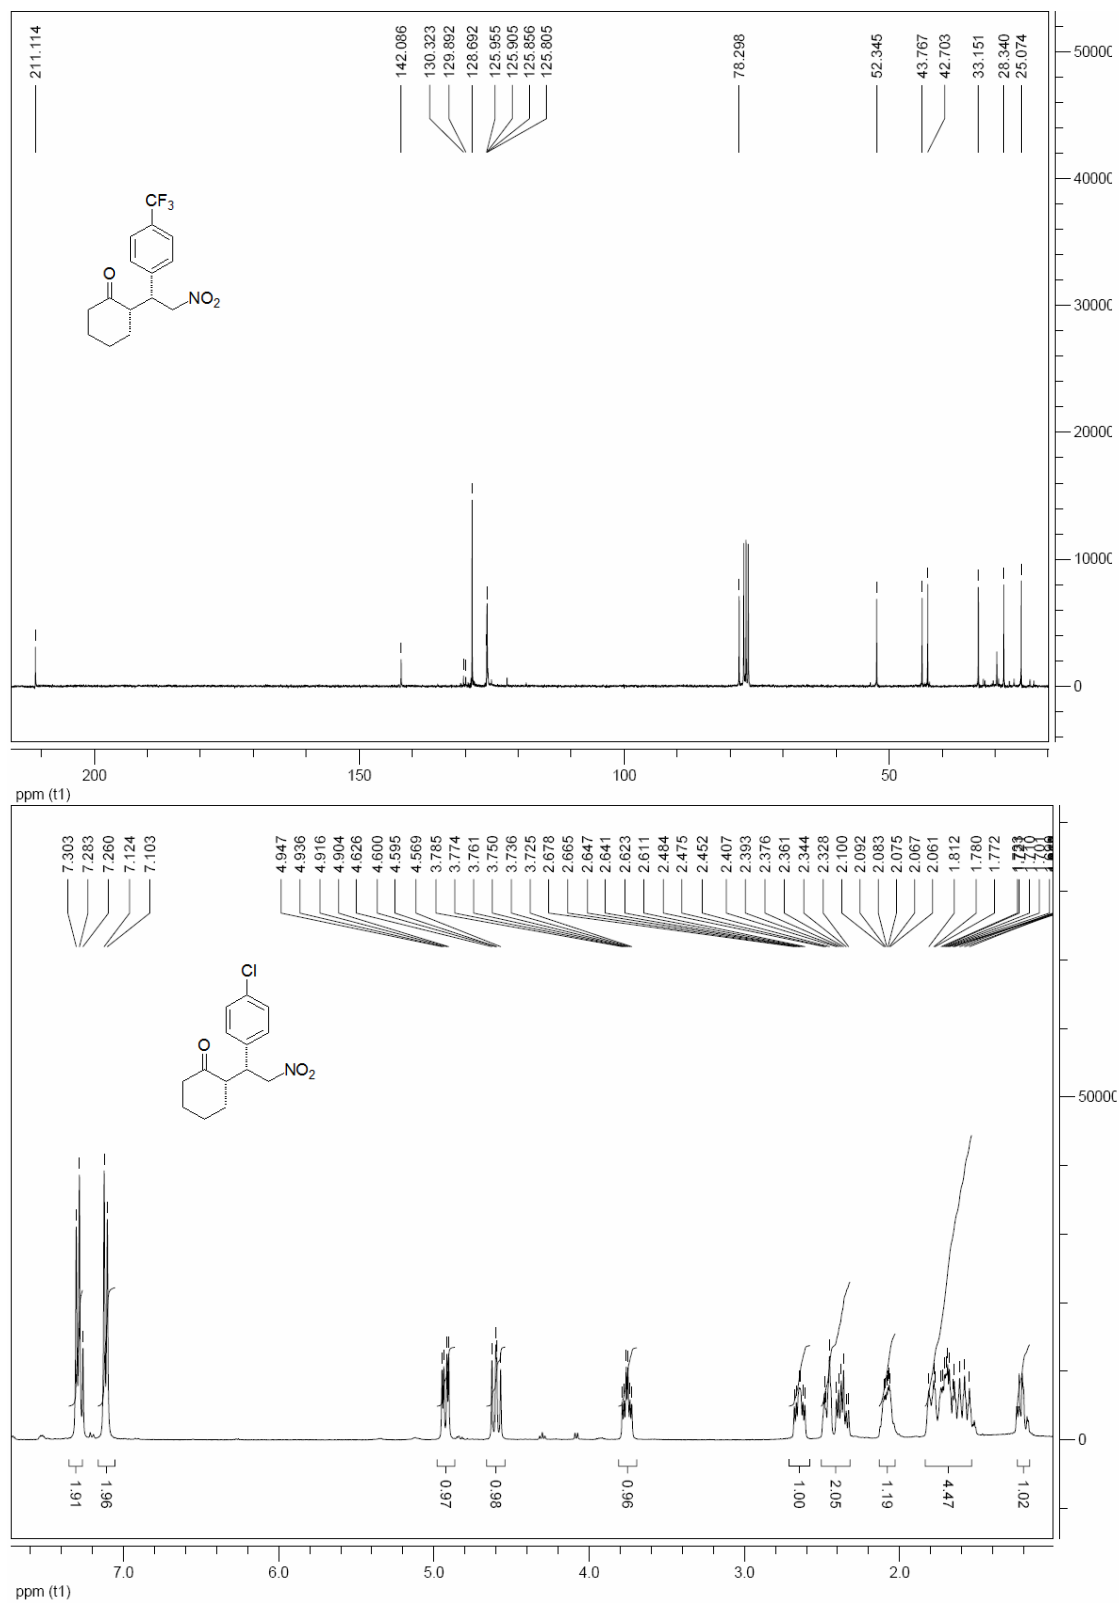

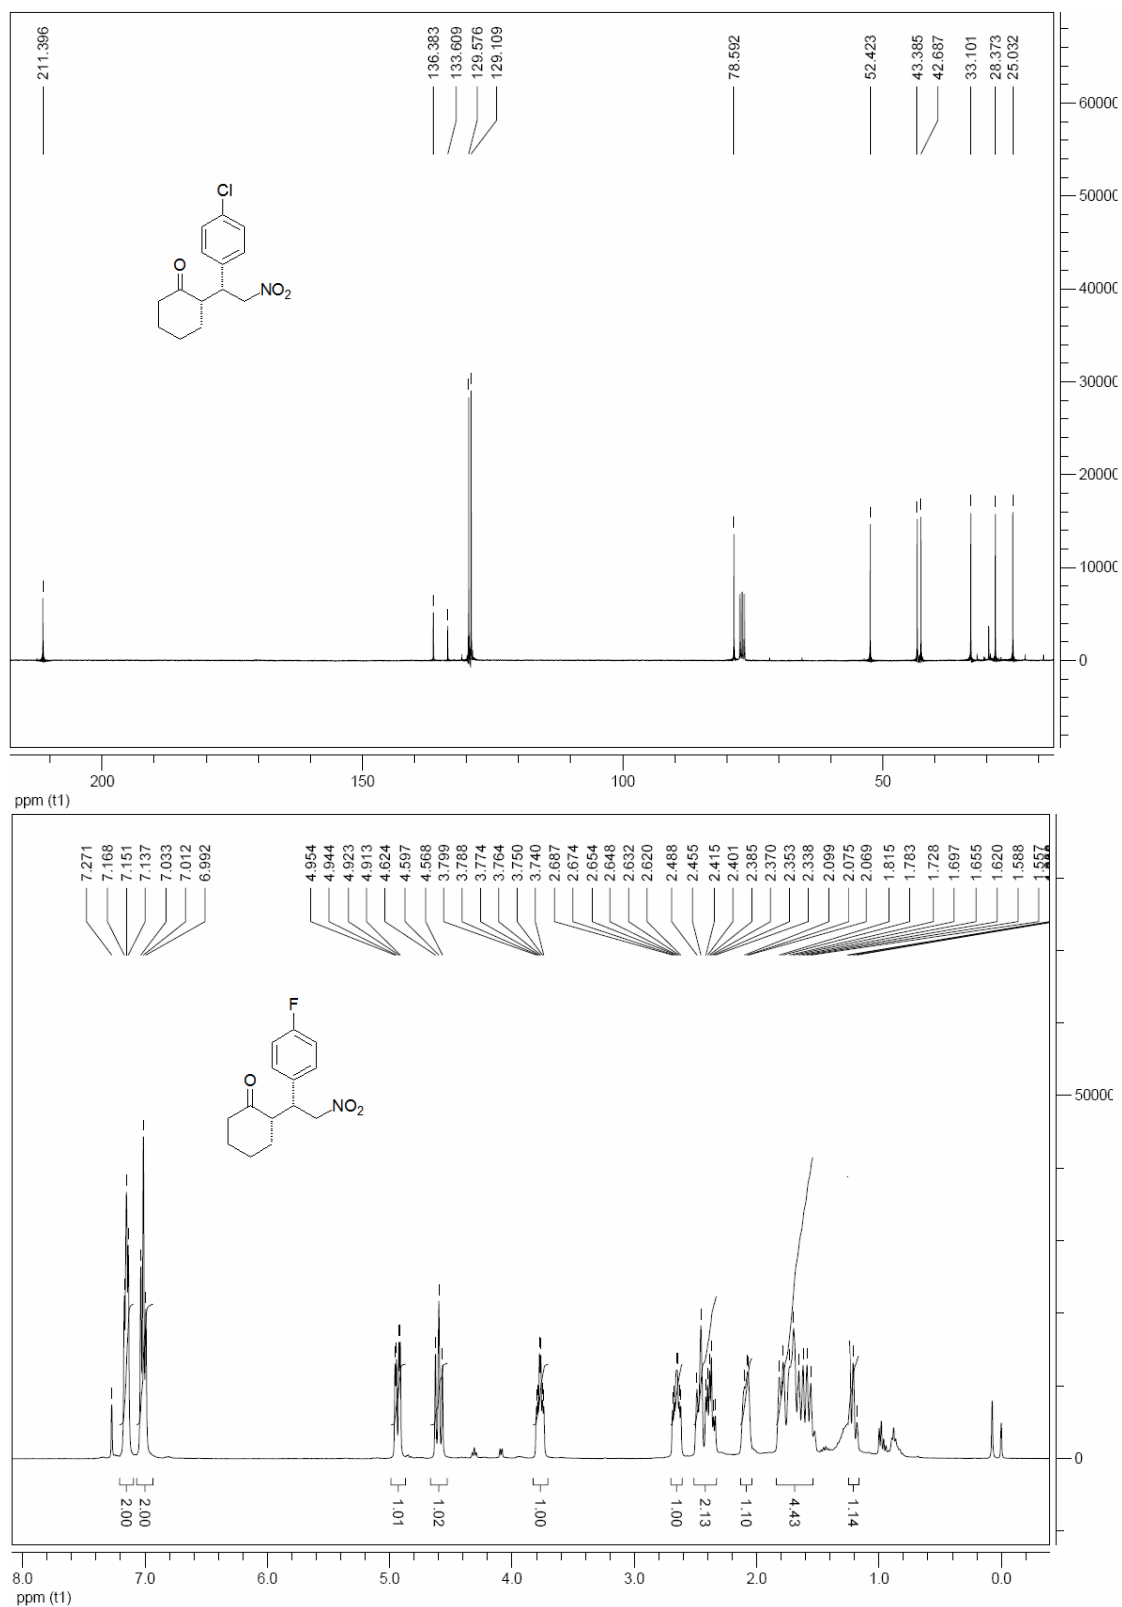

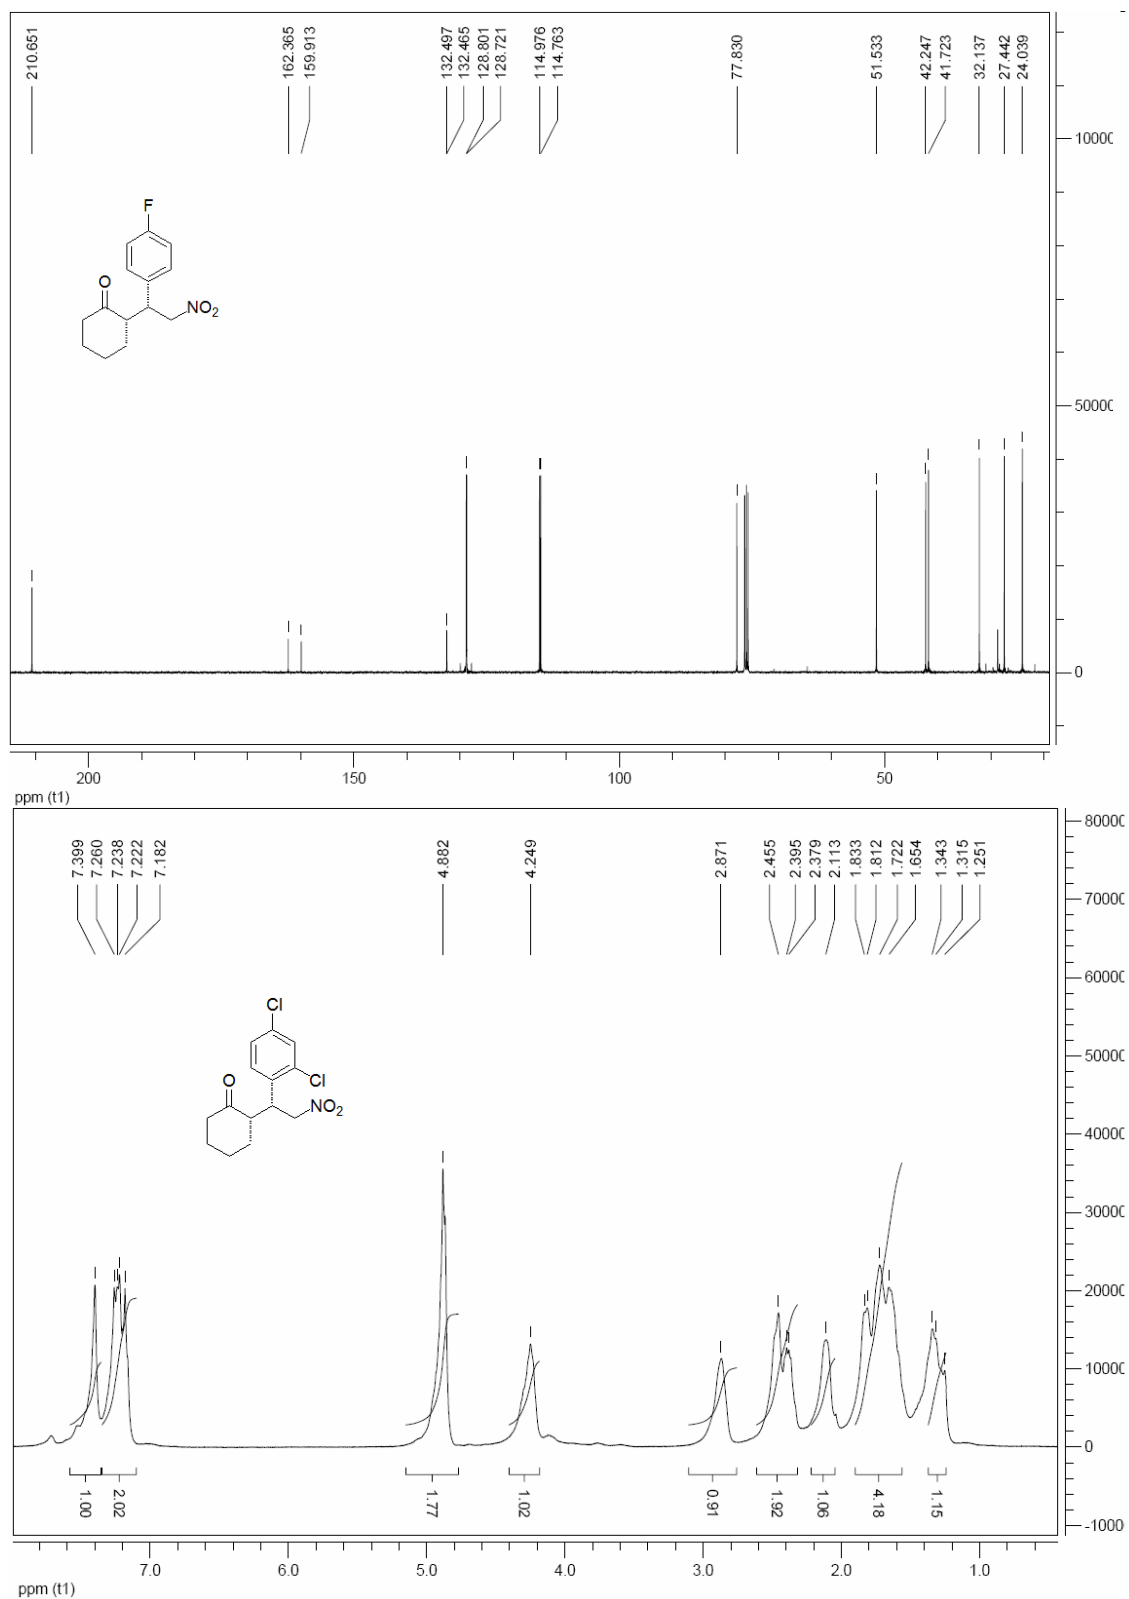

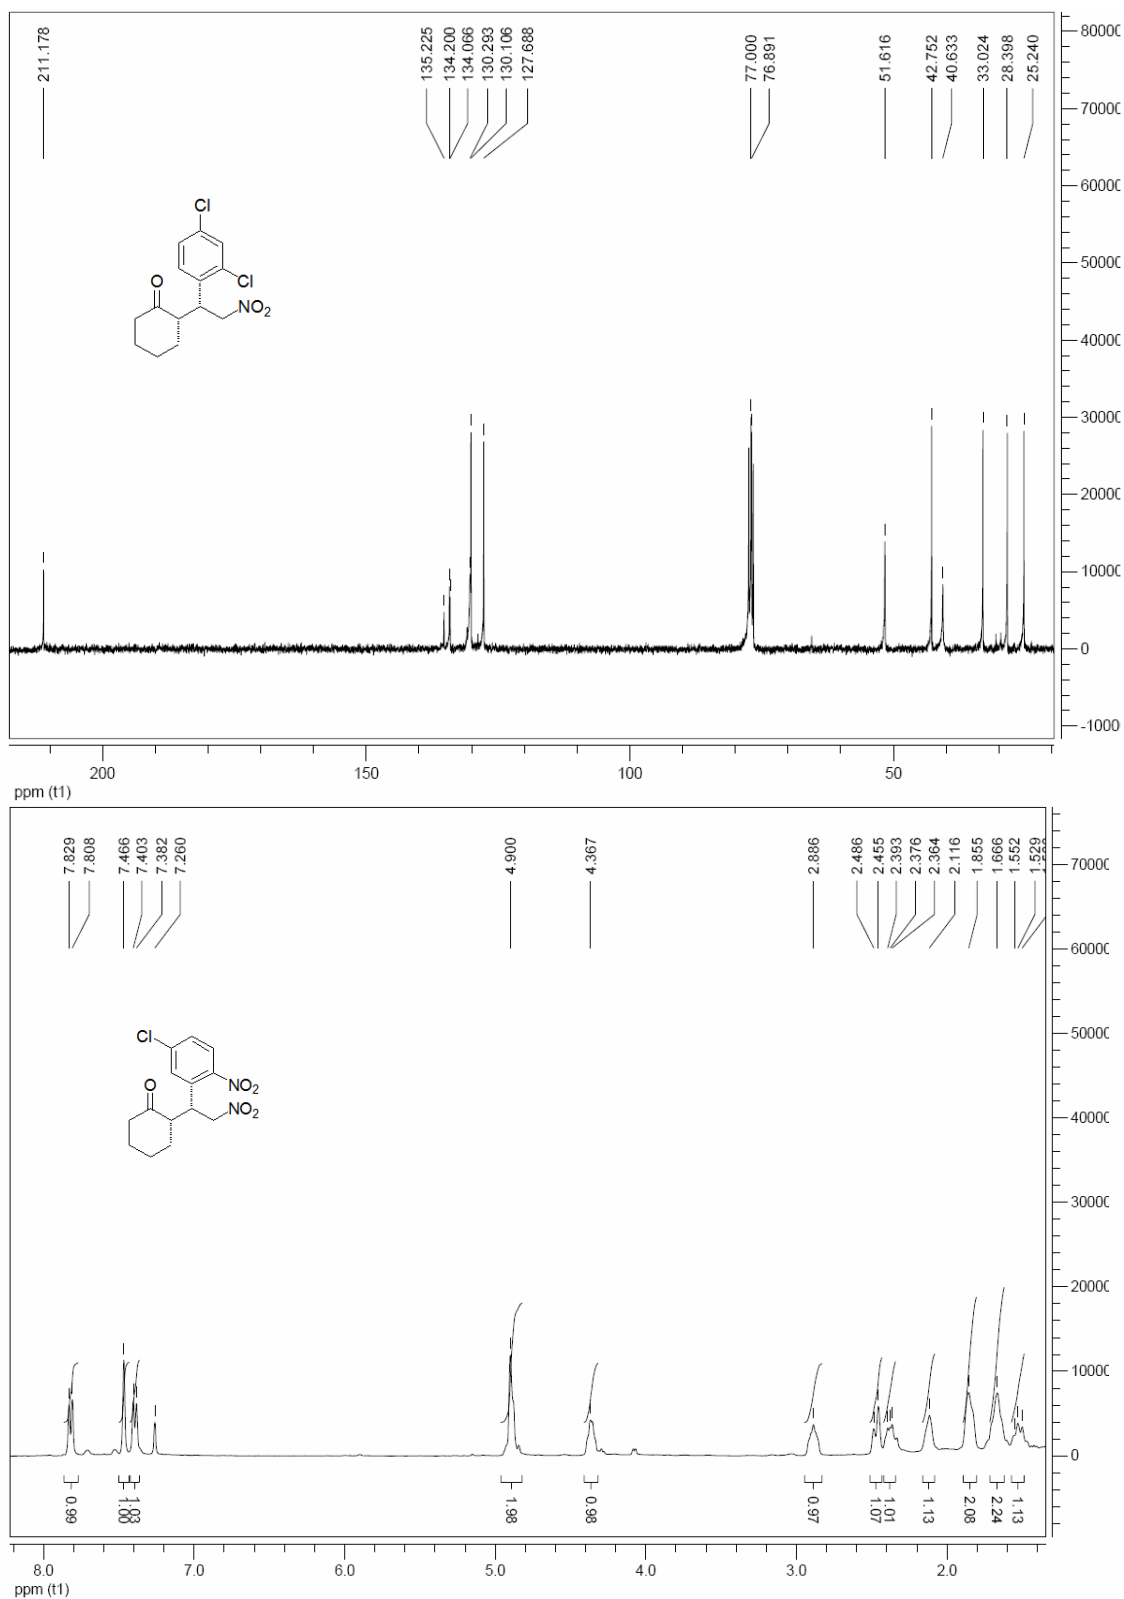

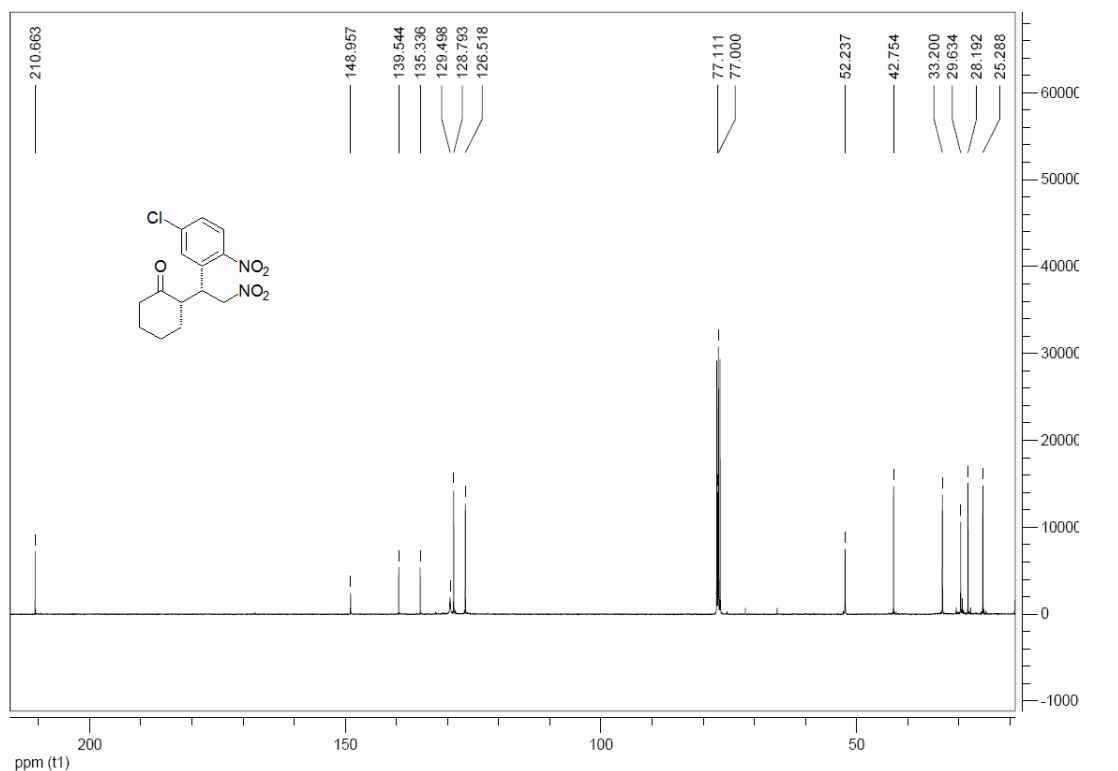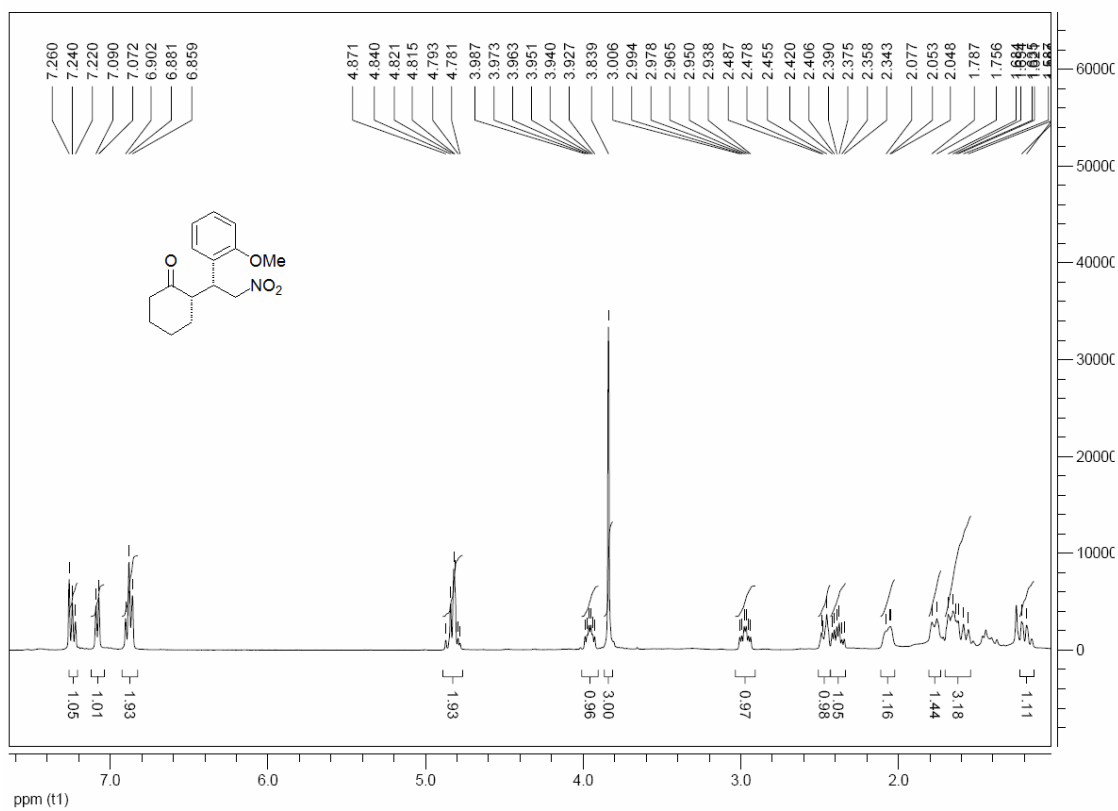

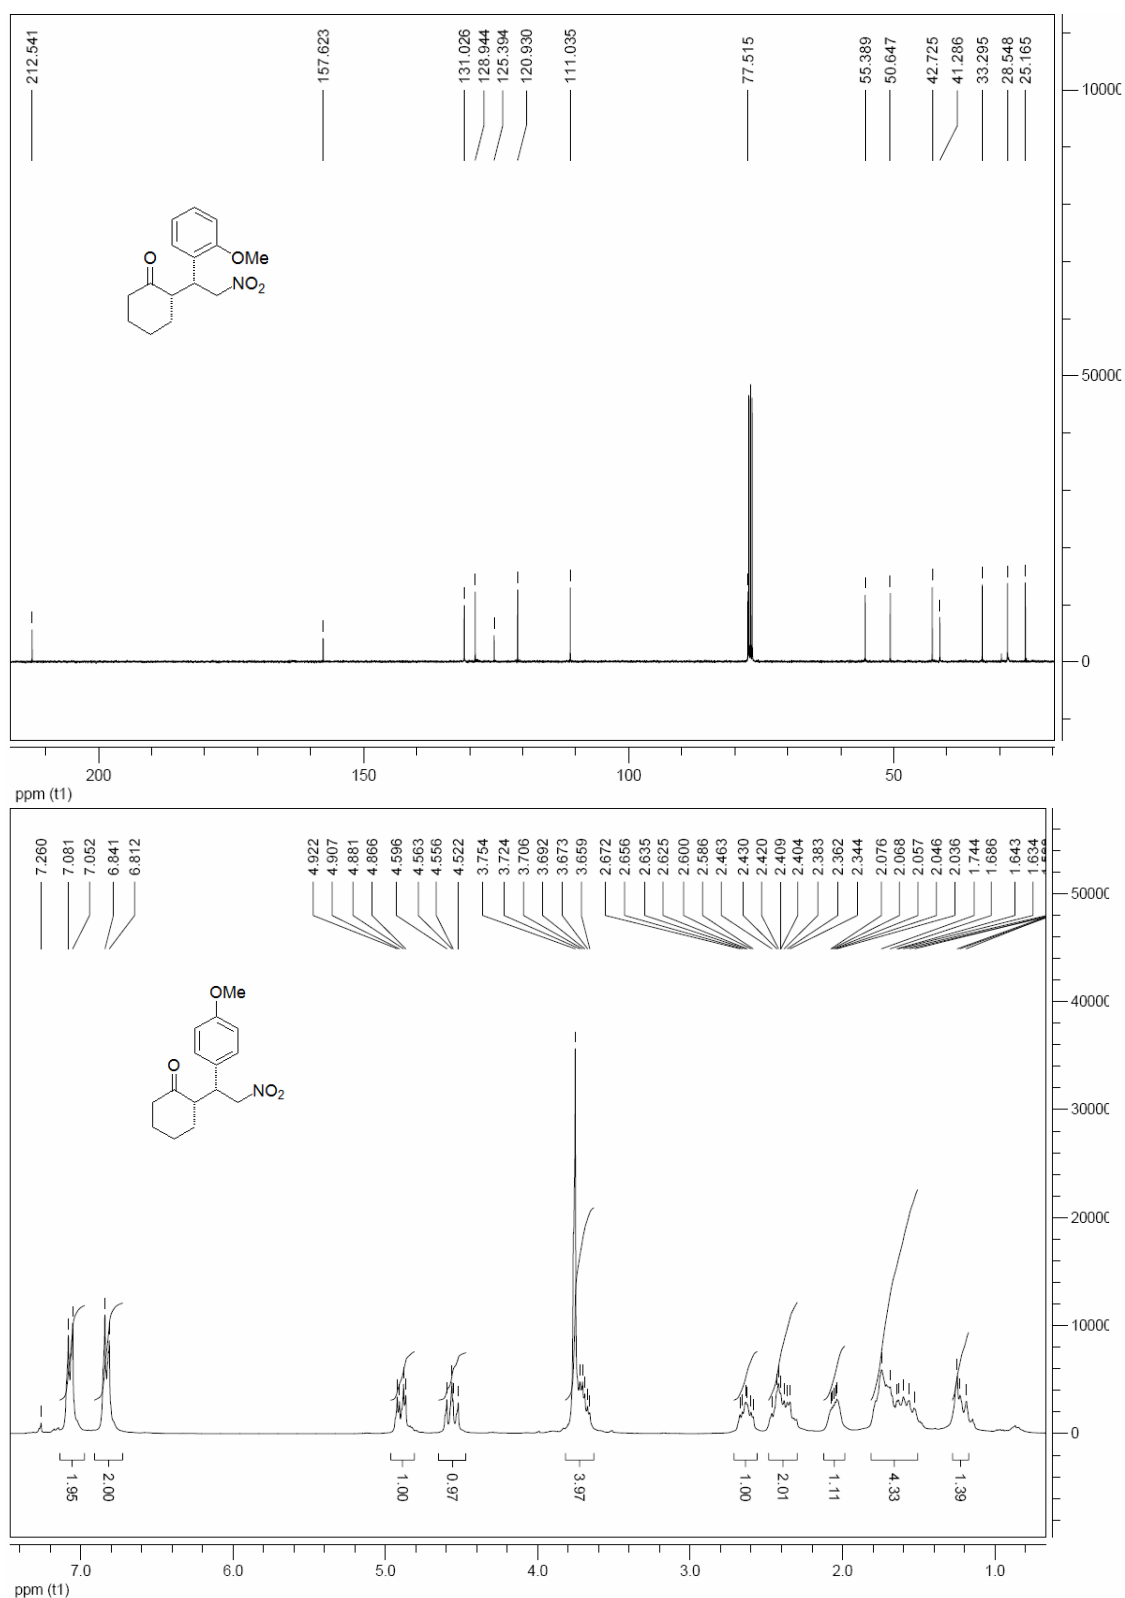

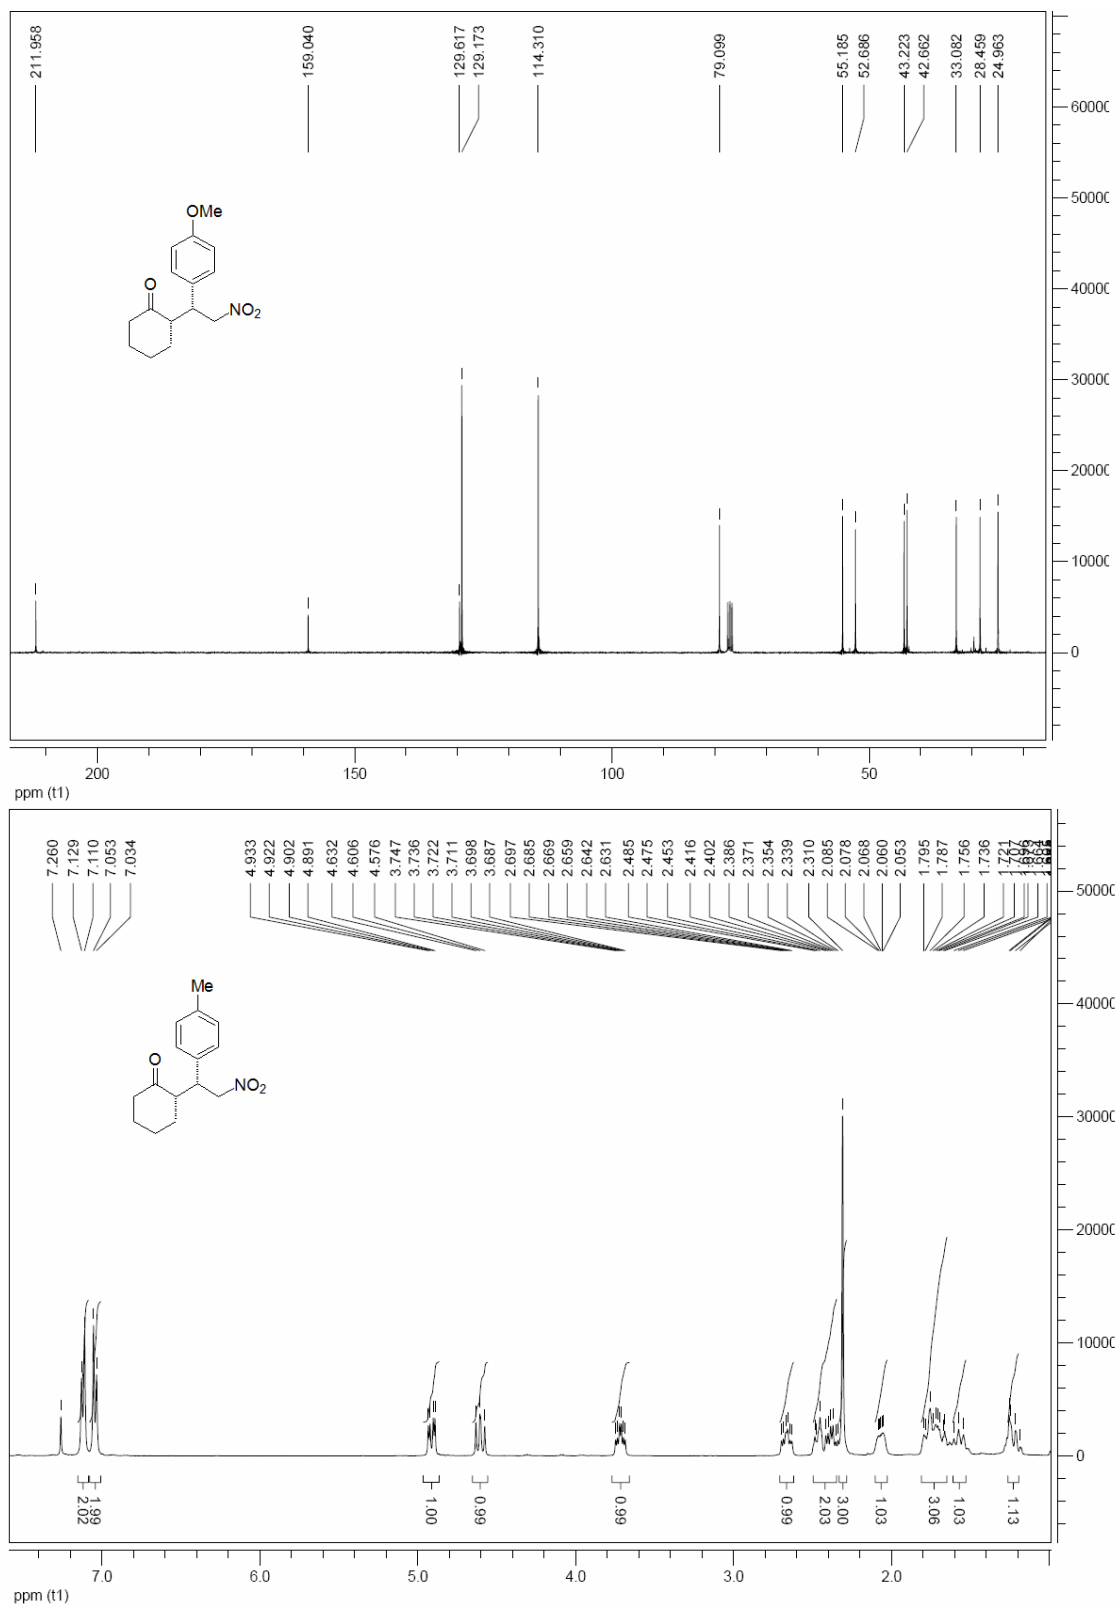

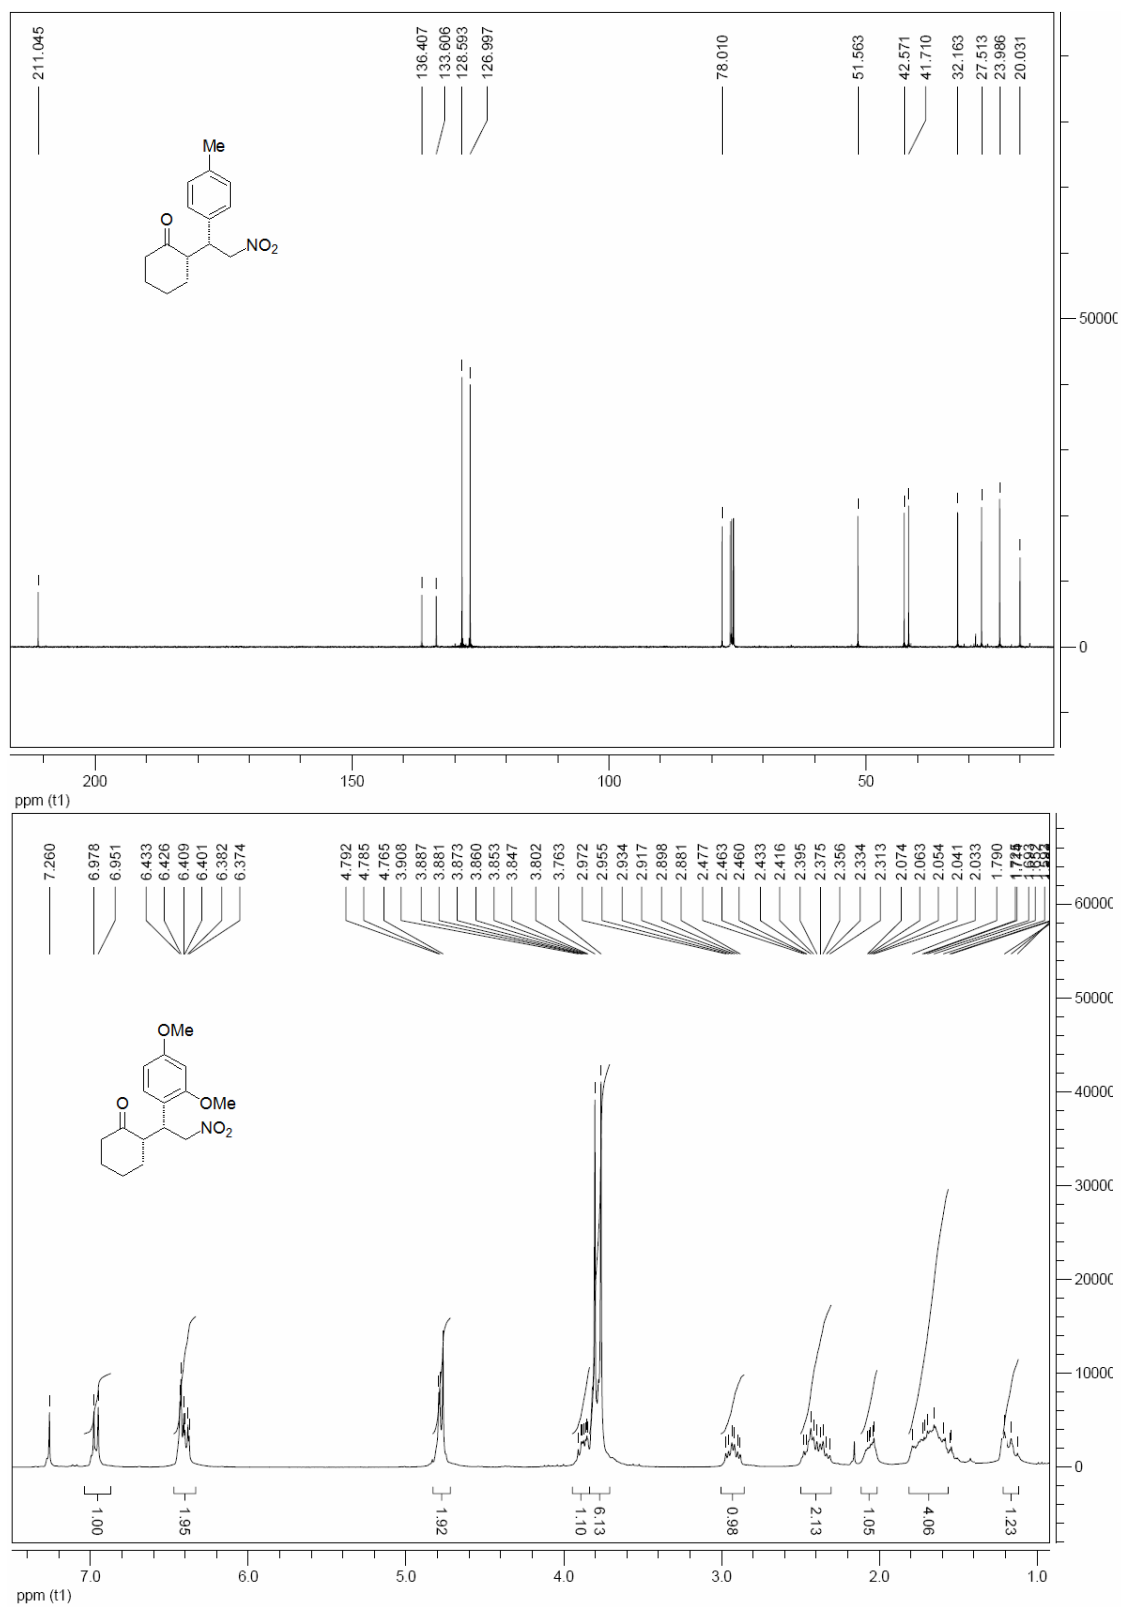



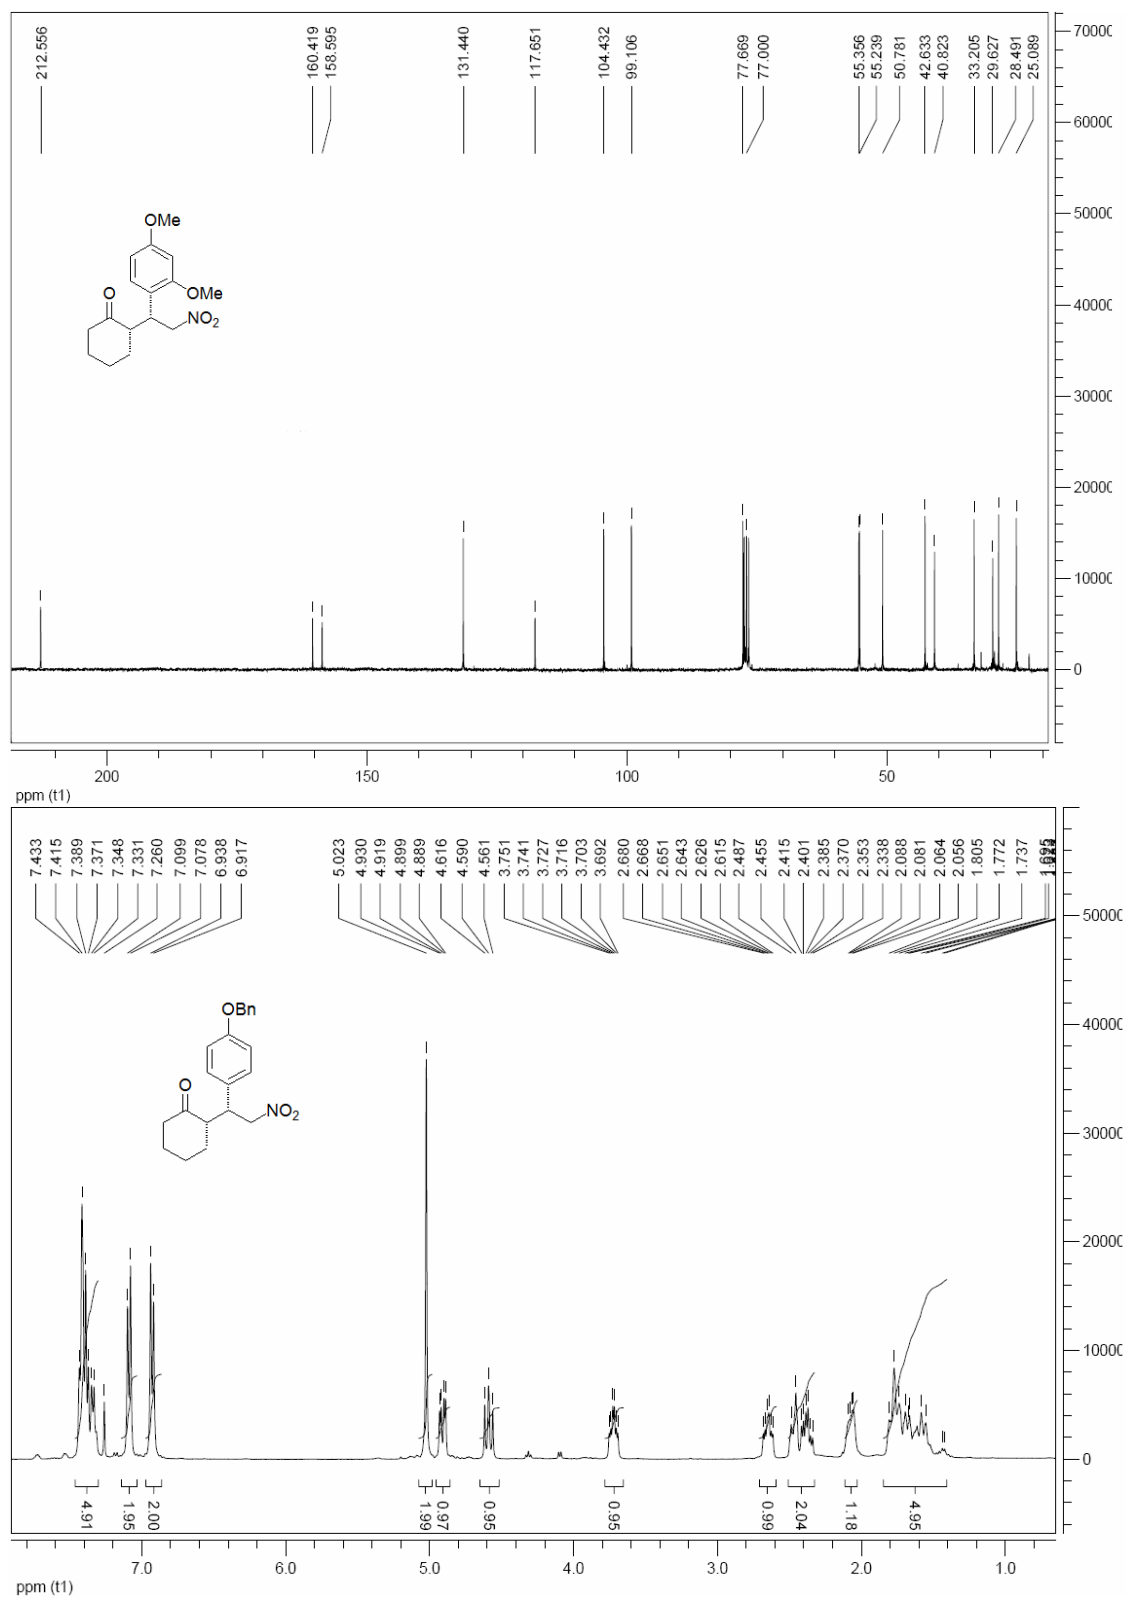

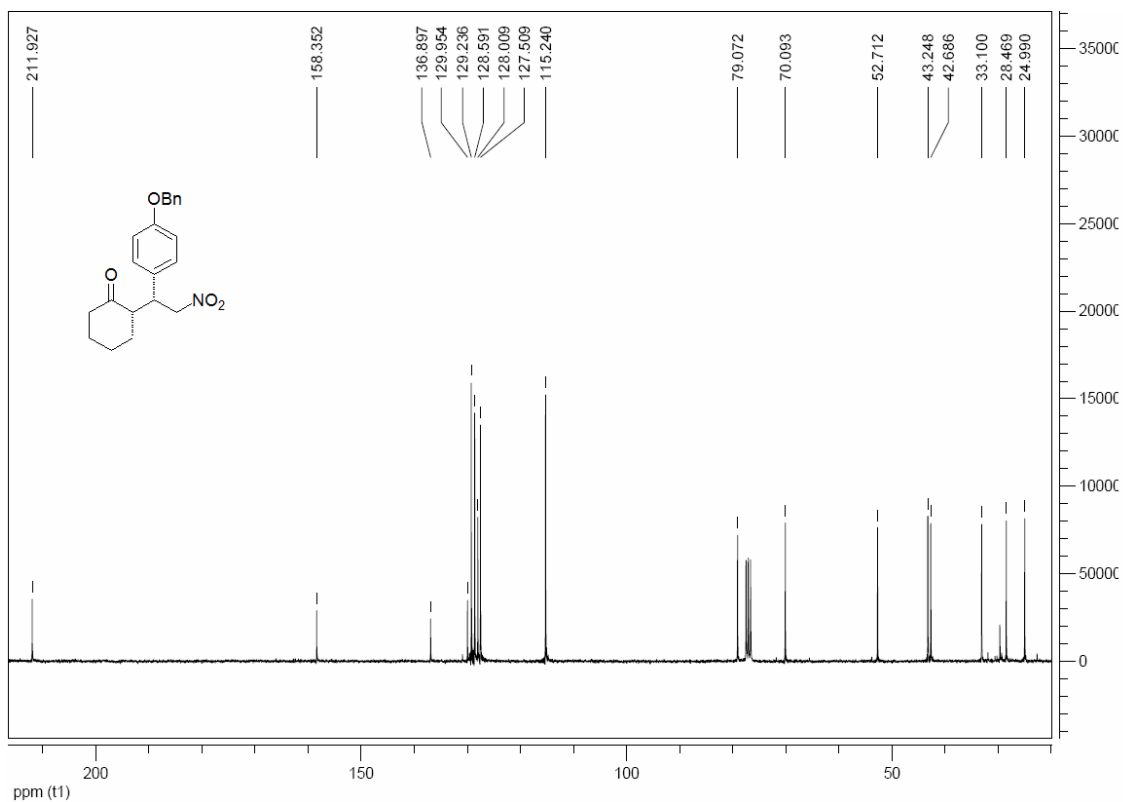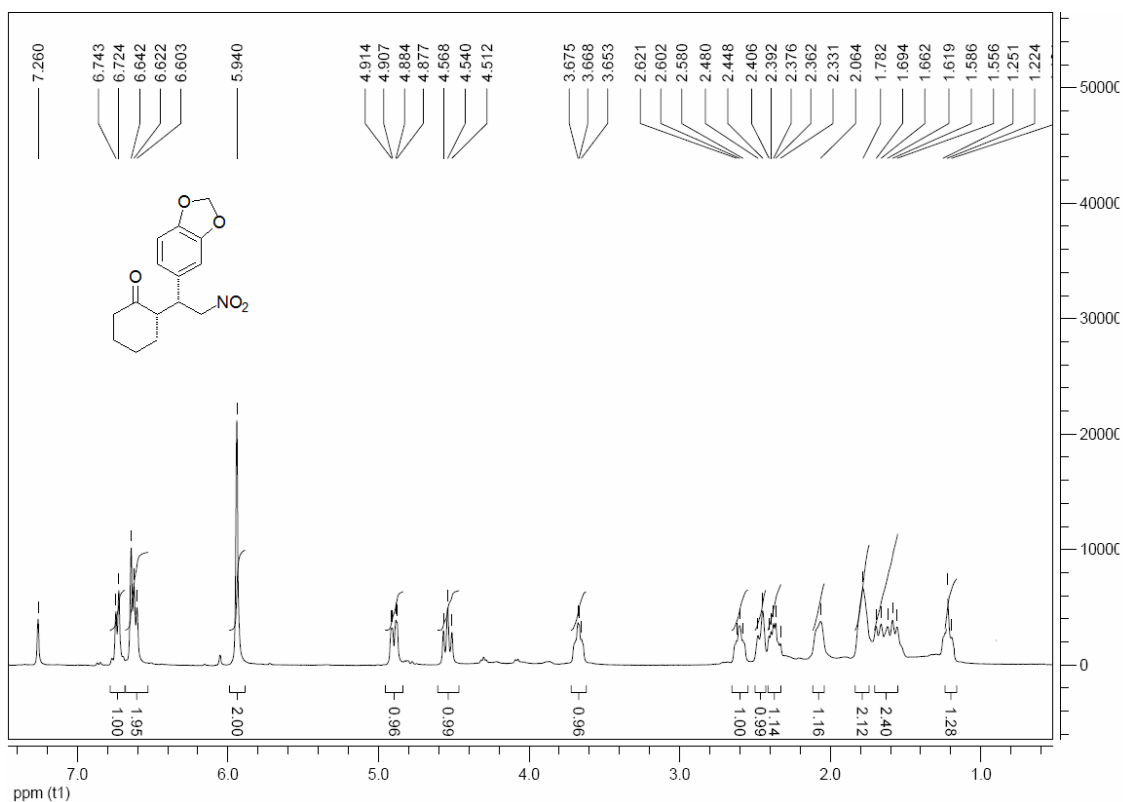

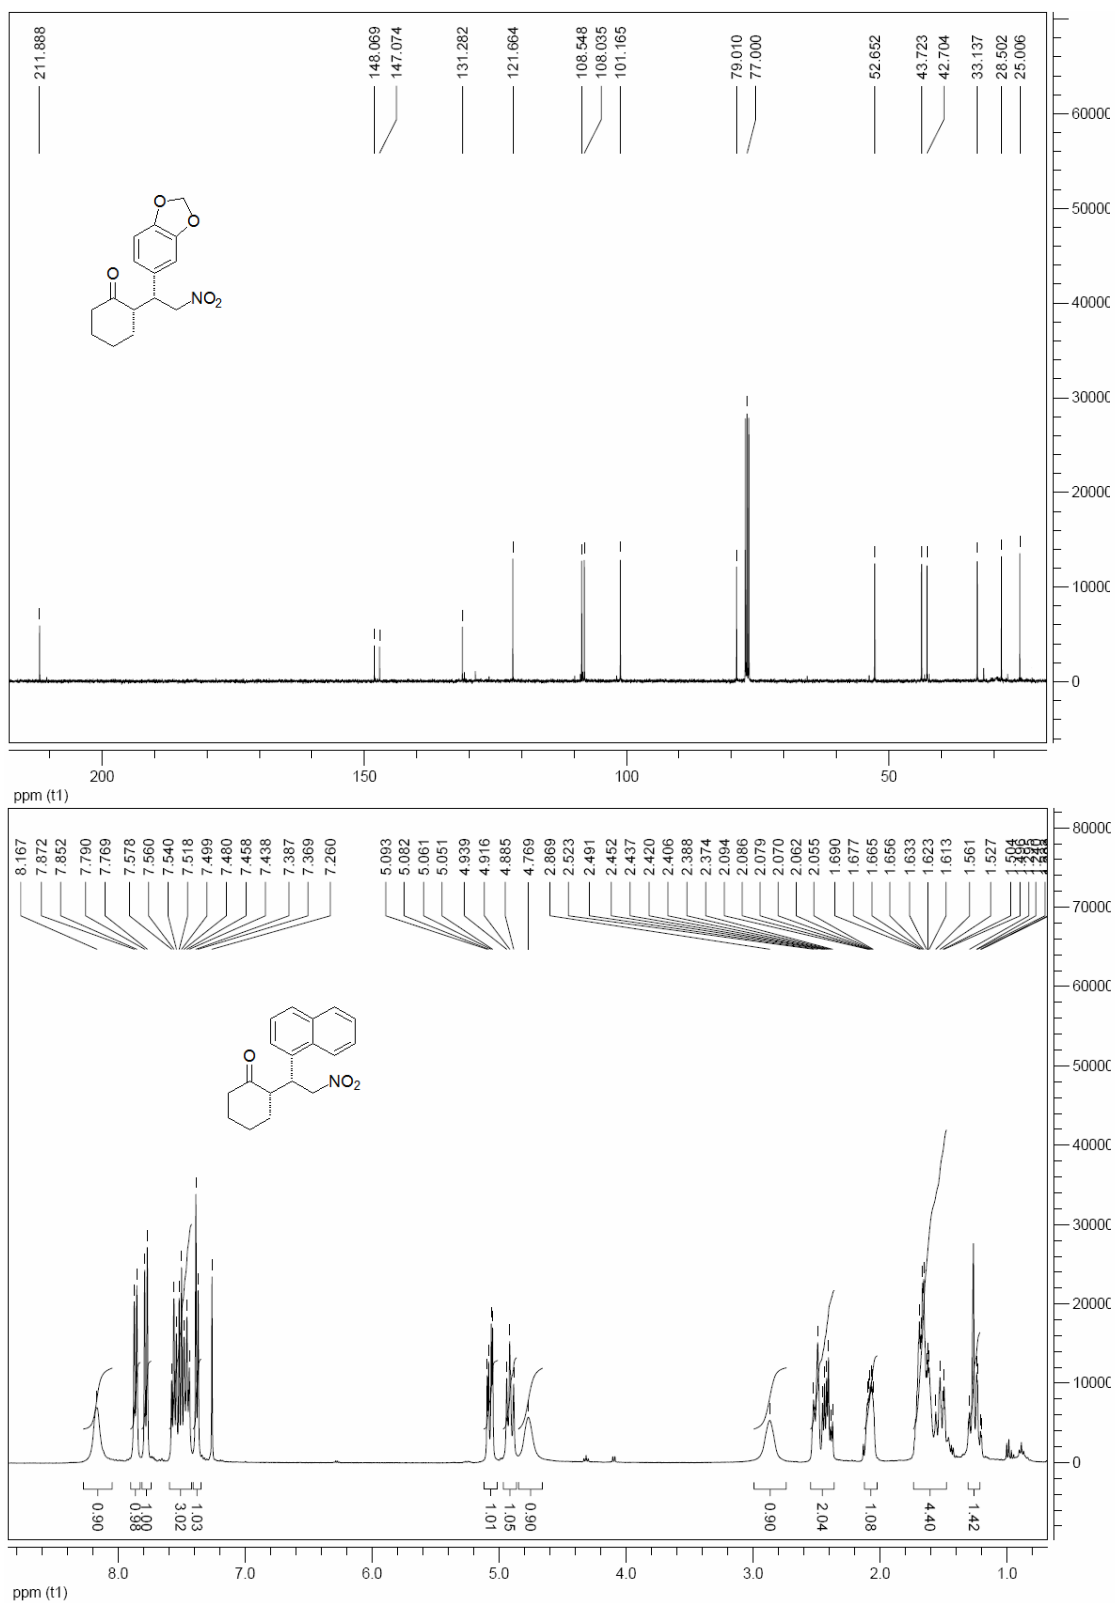

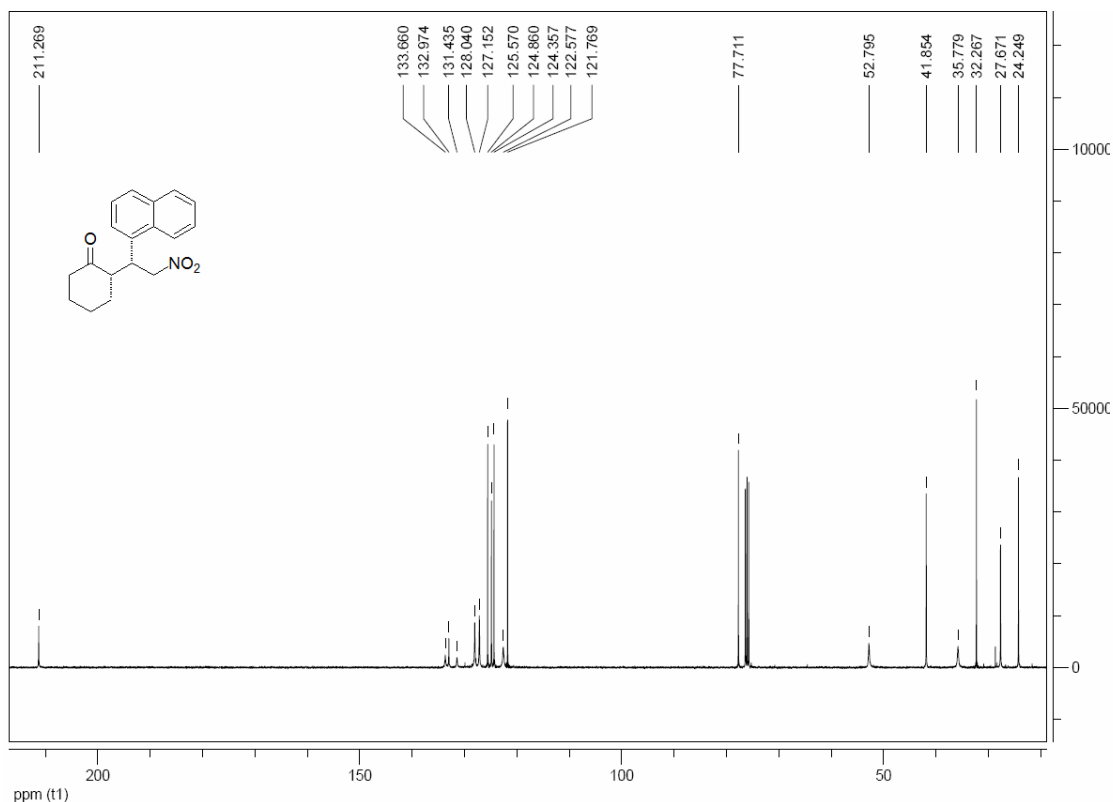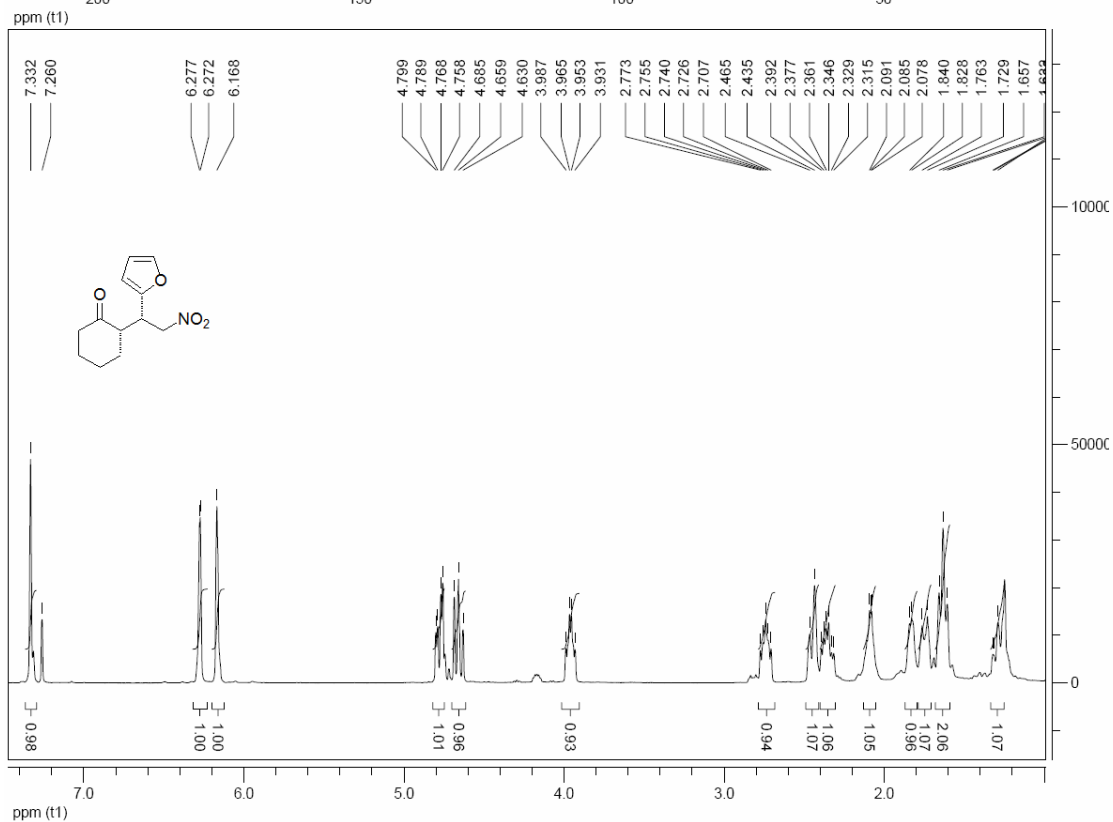

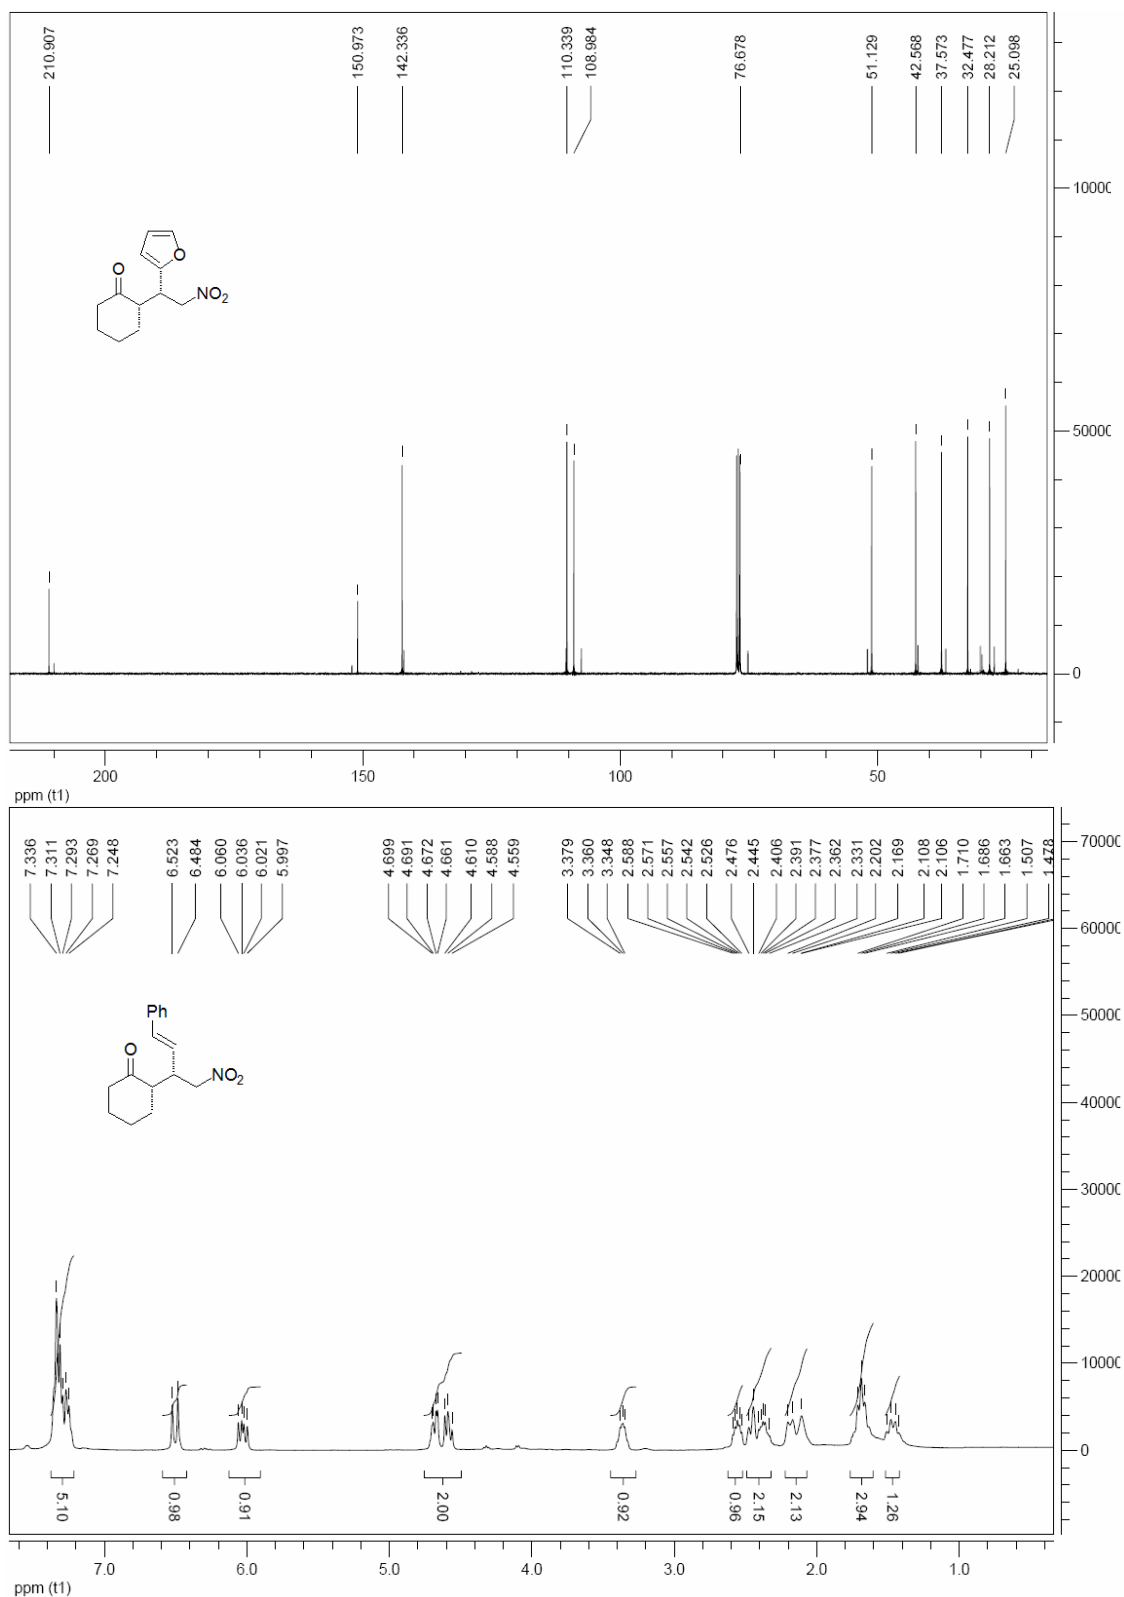

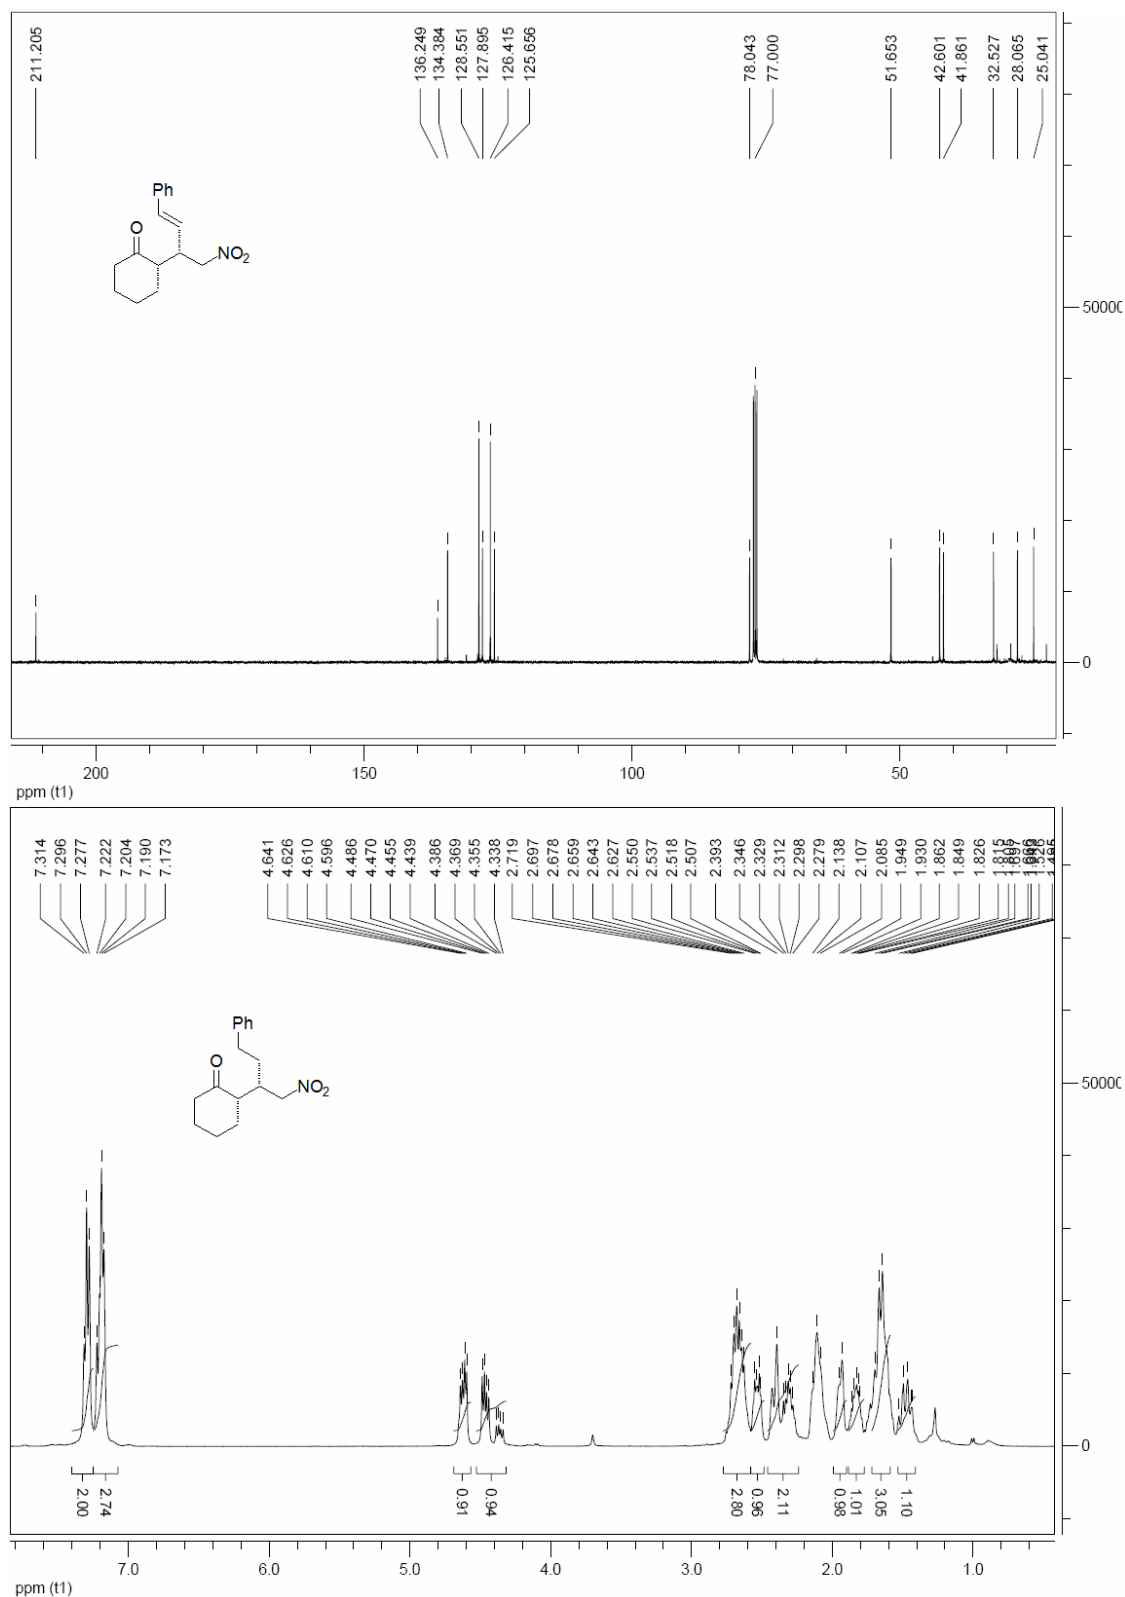

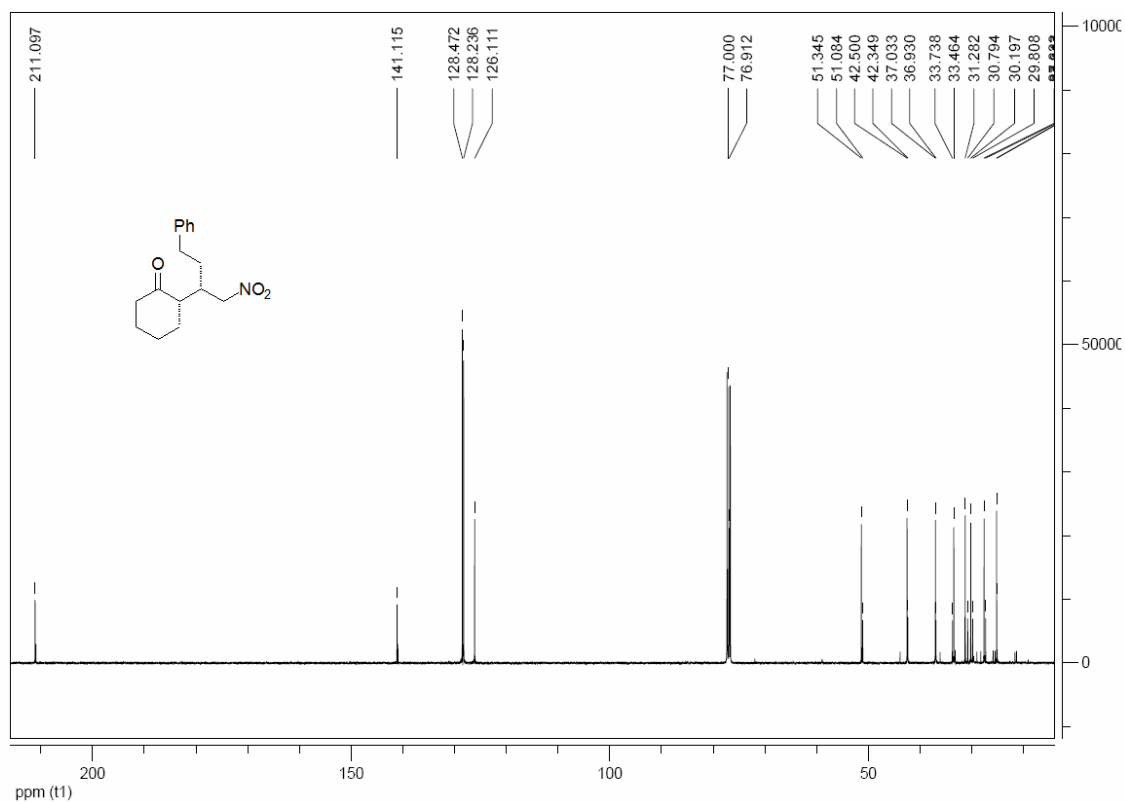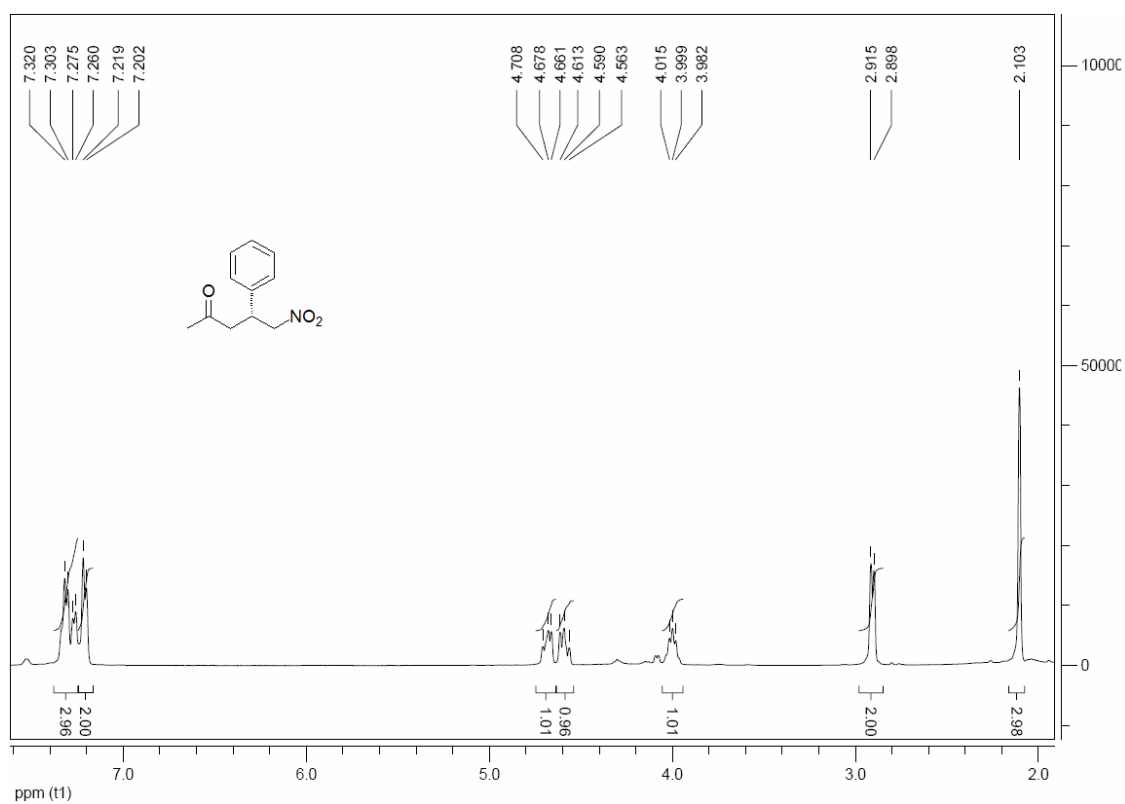

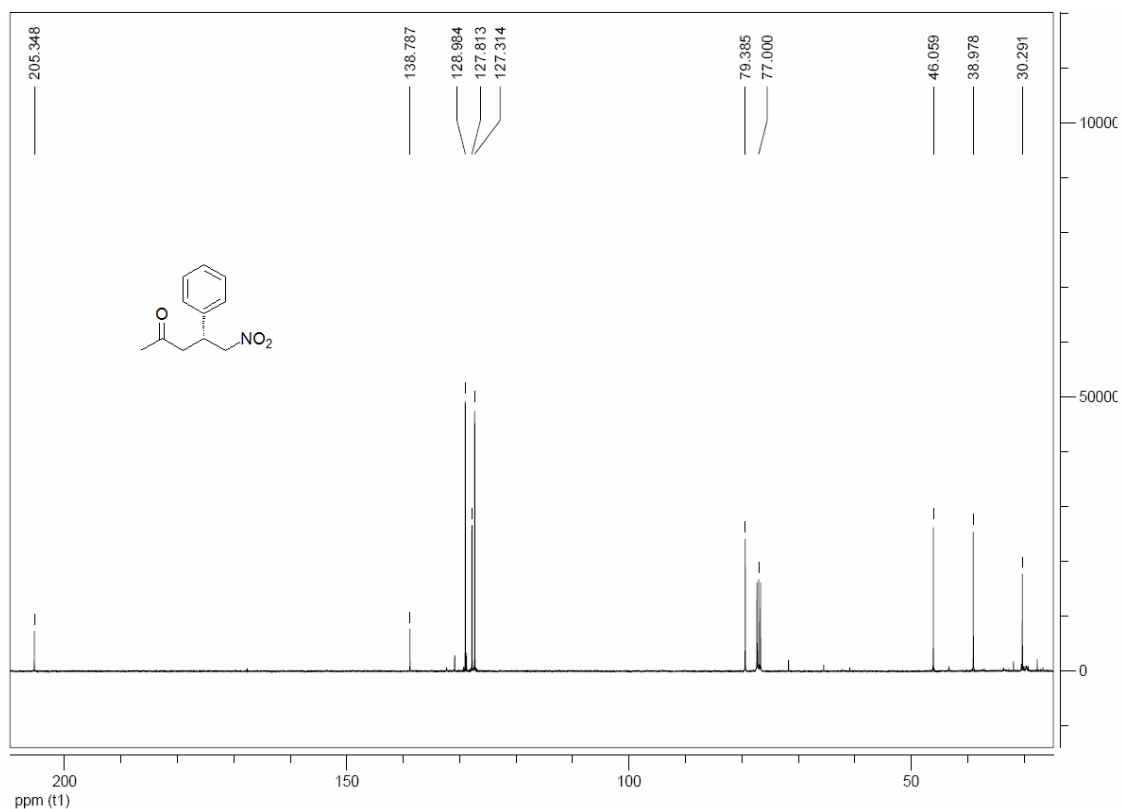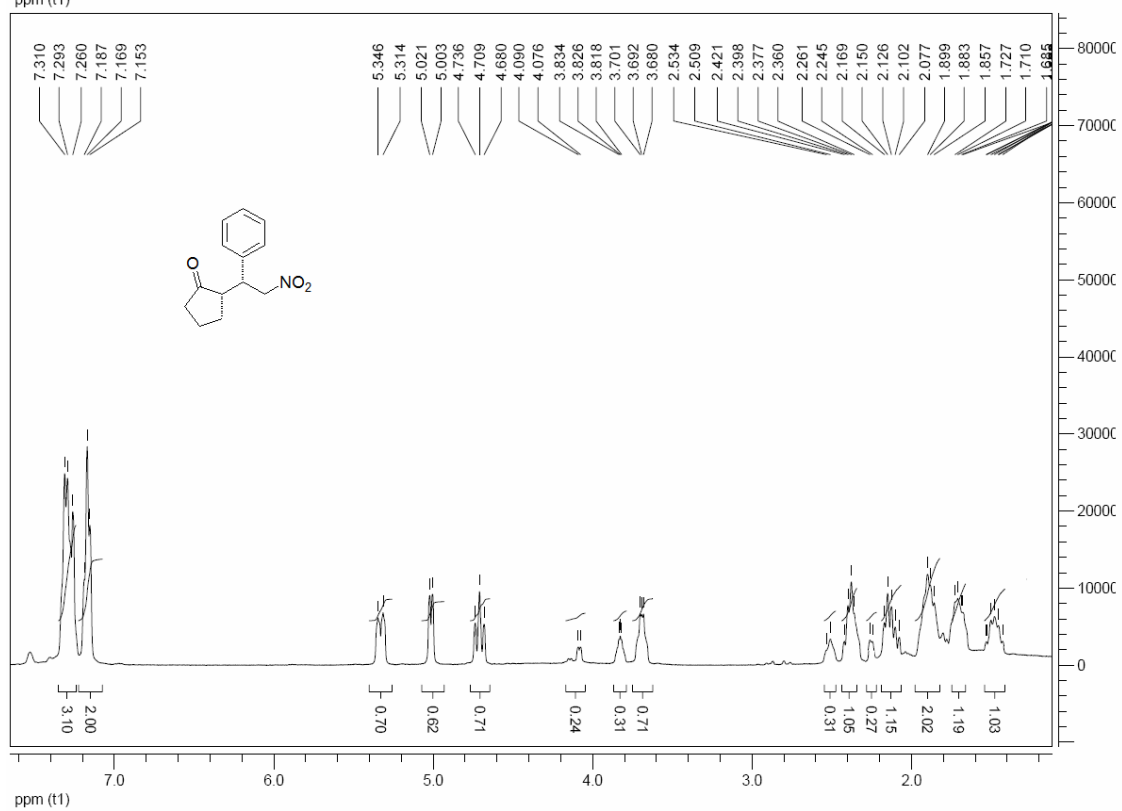



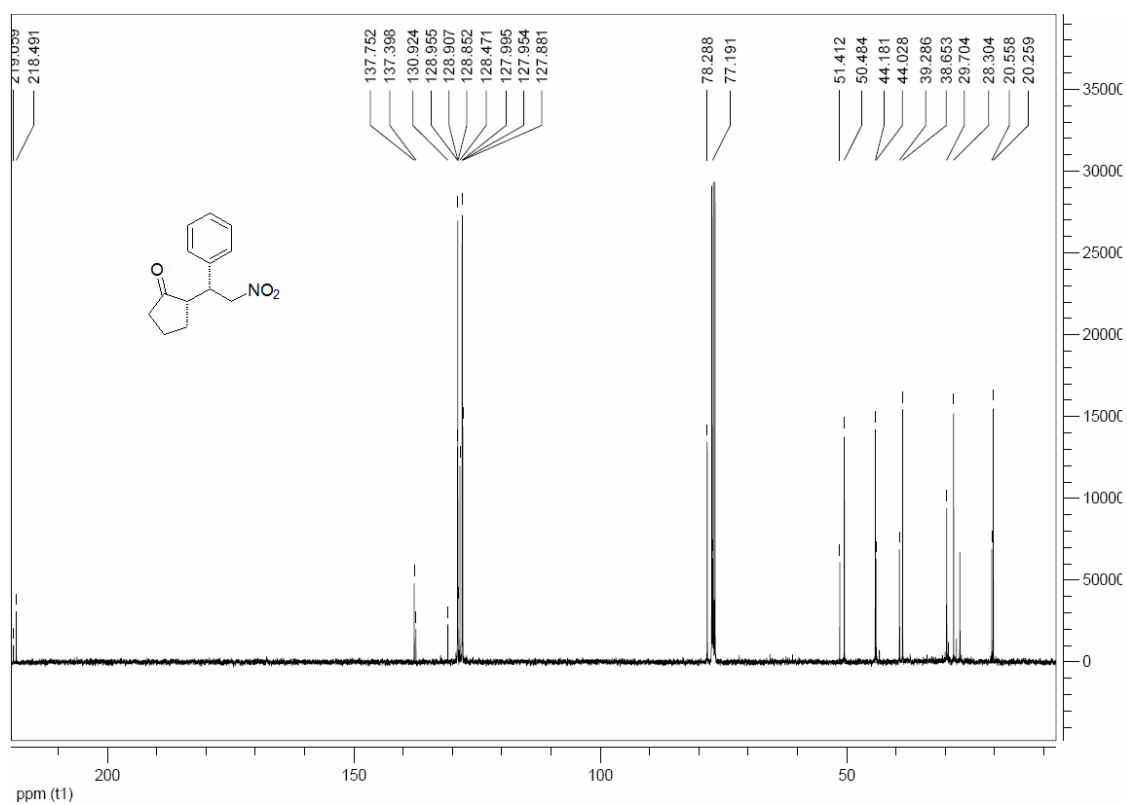

## 2. HRMS and IR spectra of the prepared thiourea catalysts 3 and new Michael addition adduct

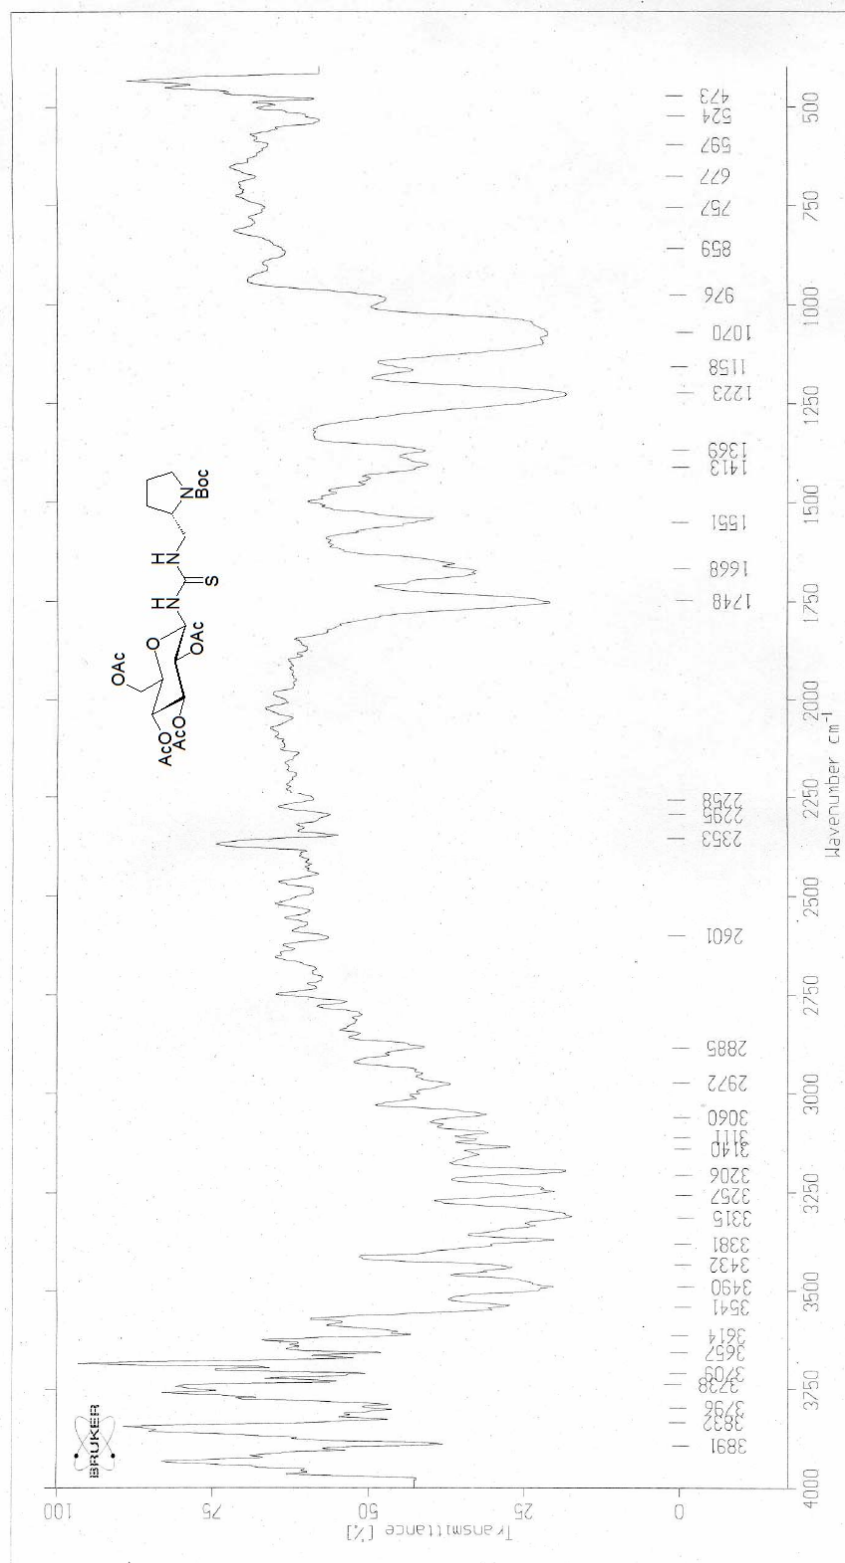

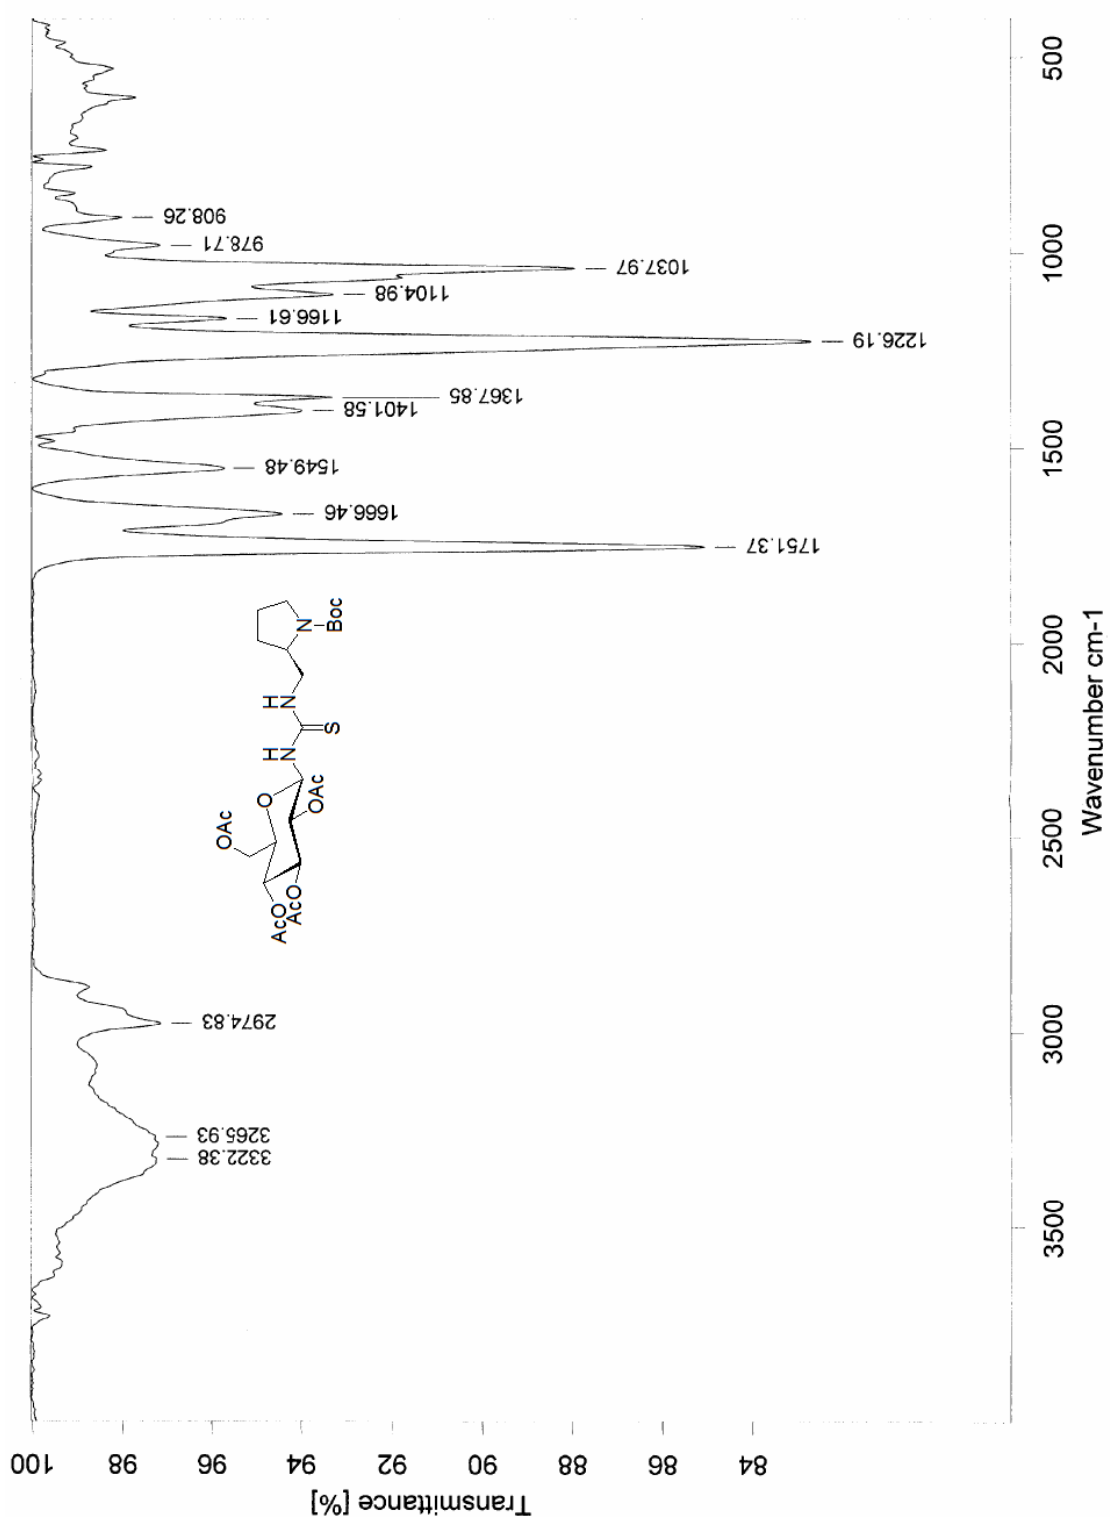

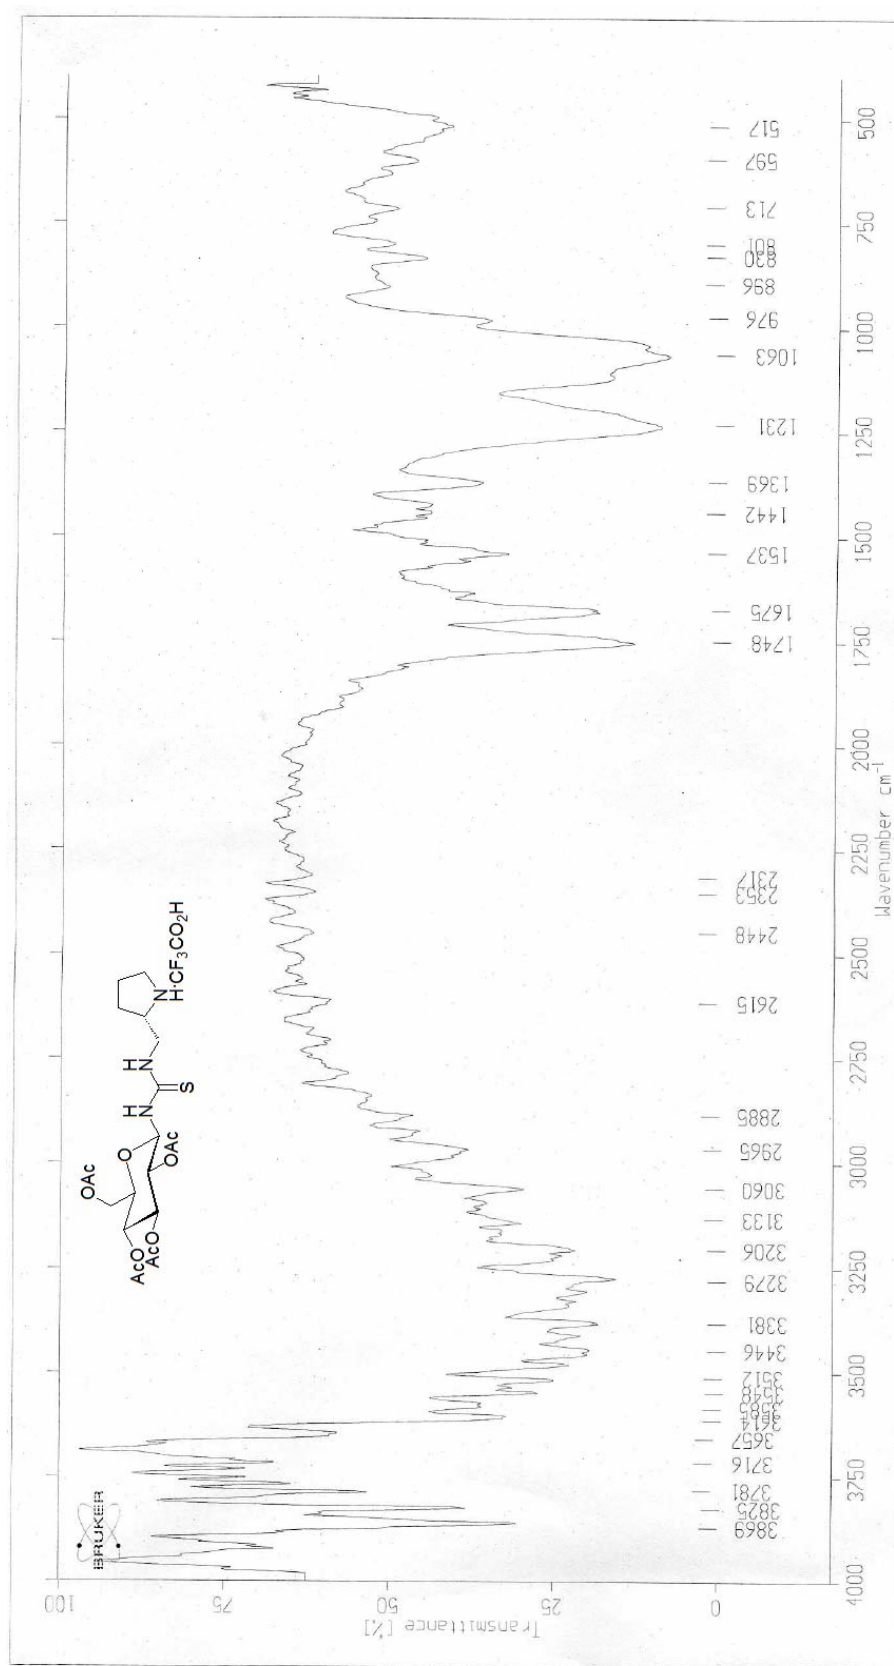

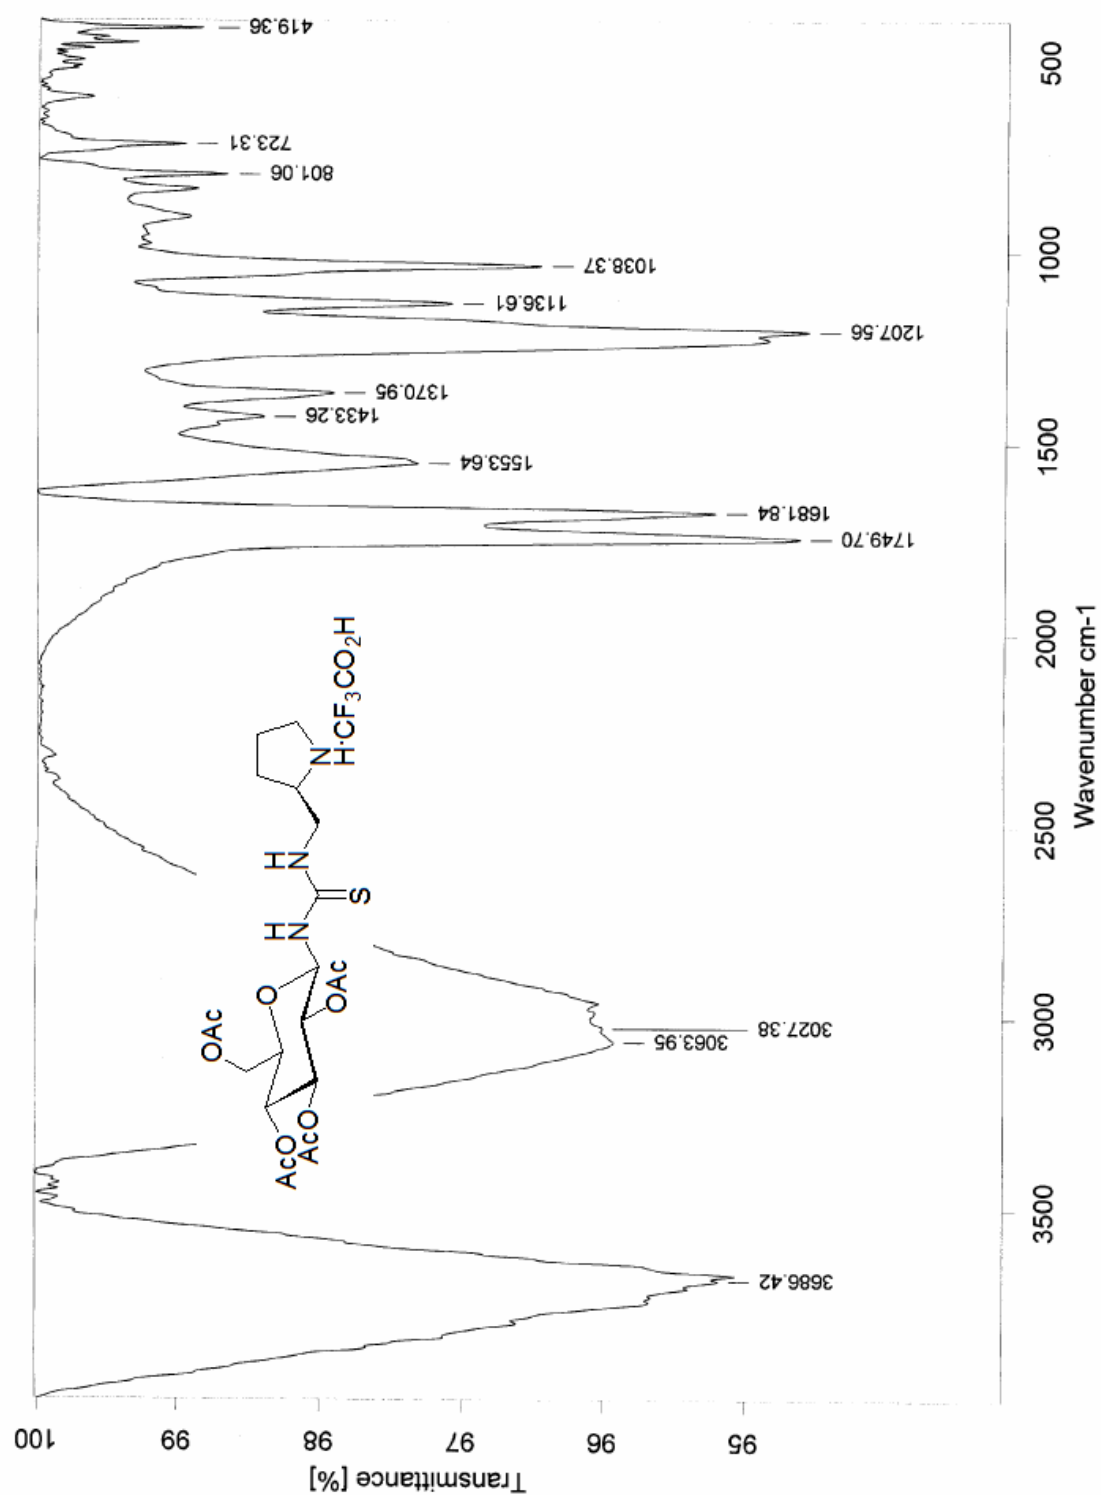

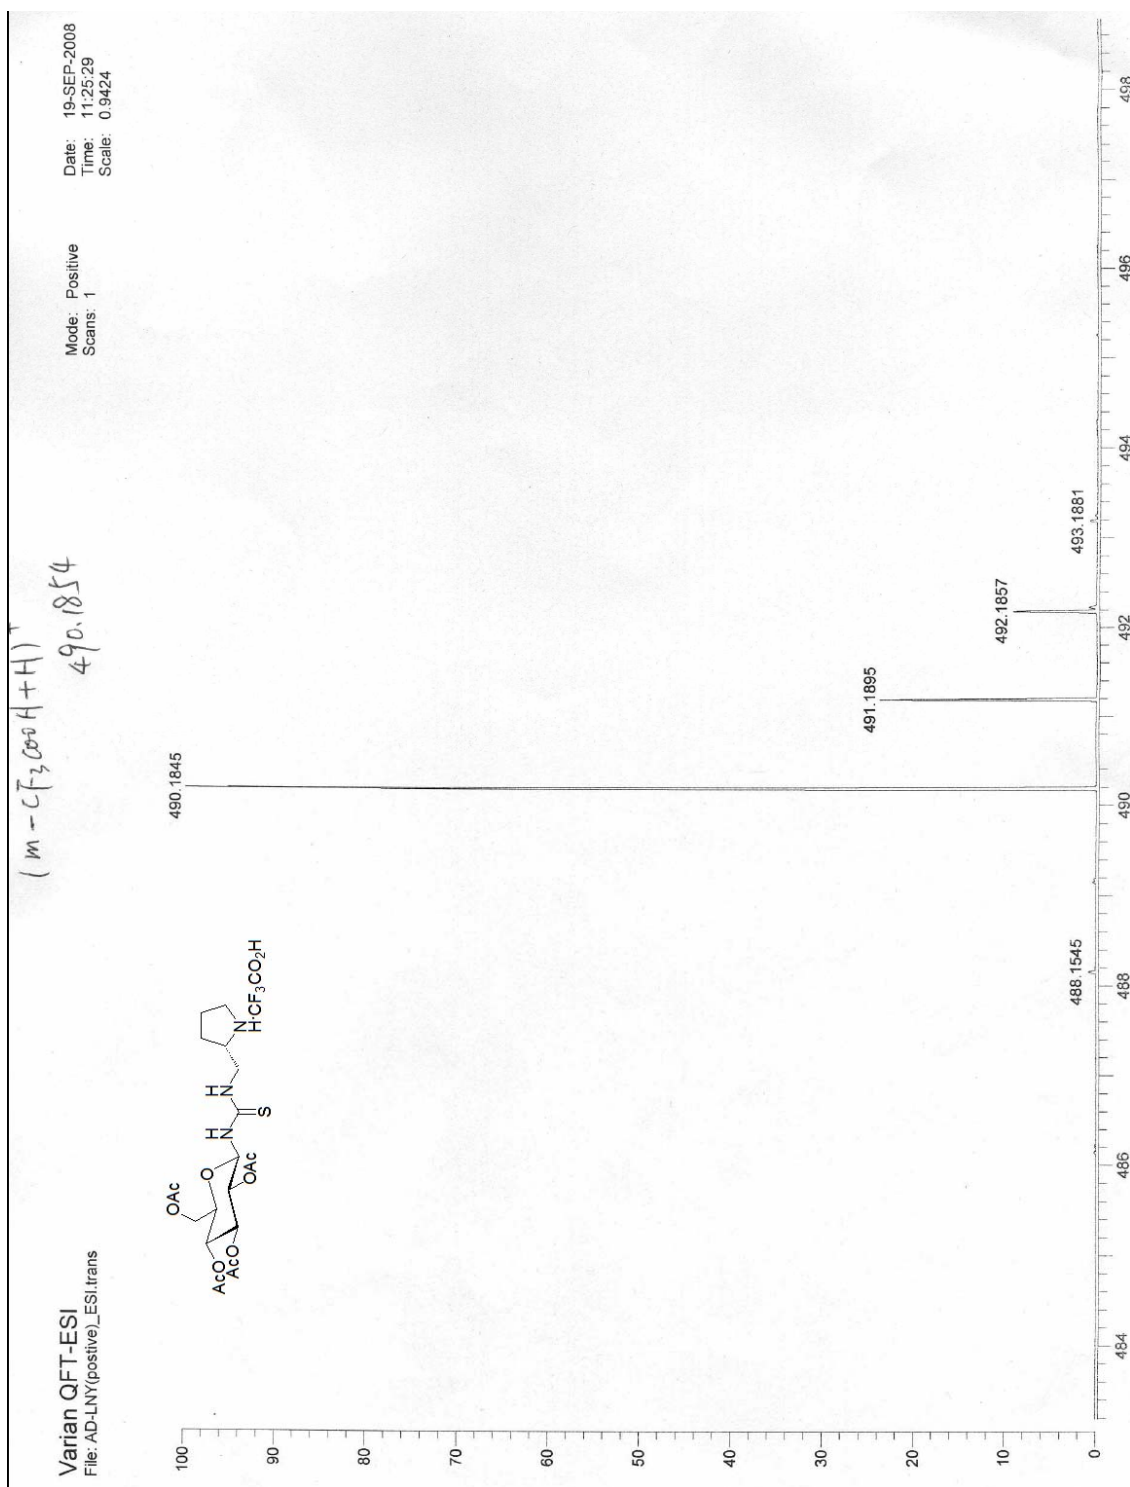

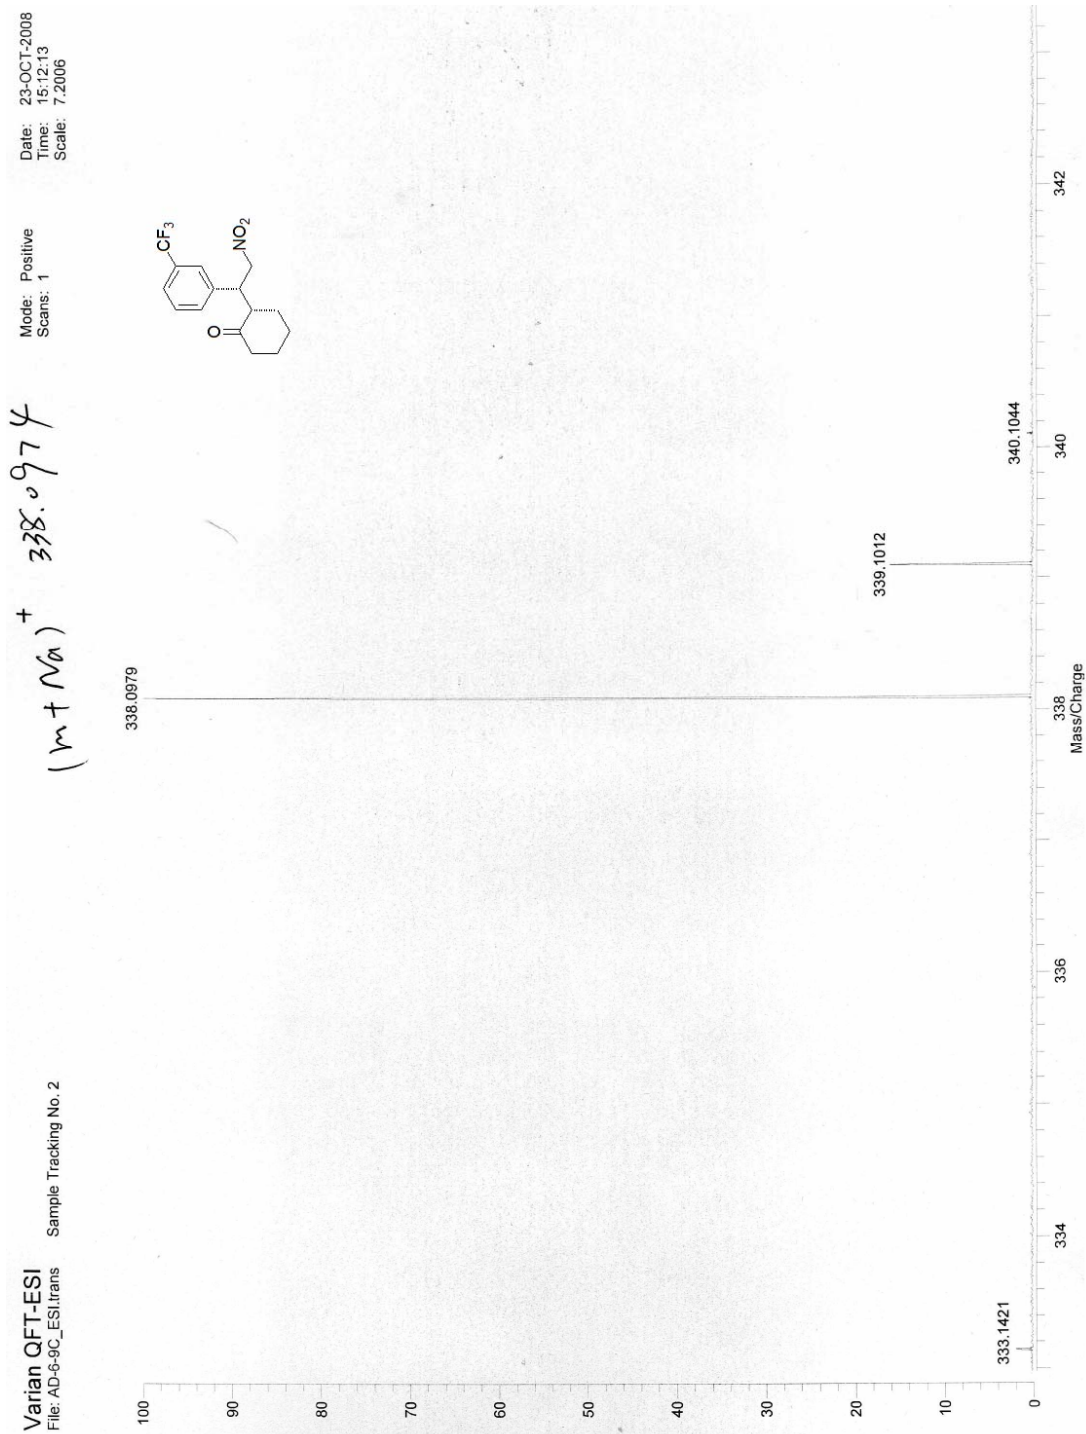

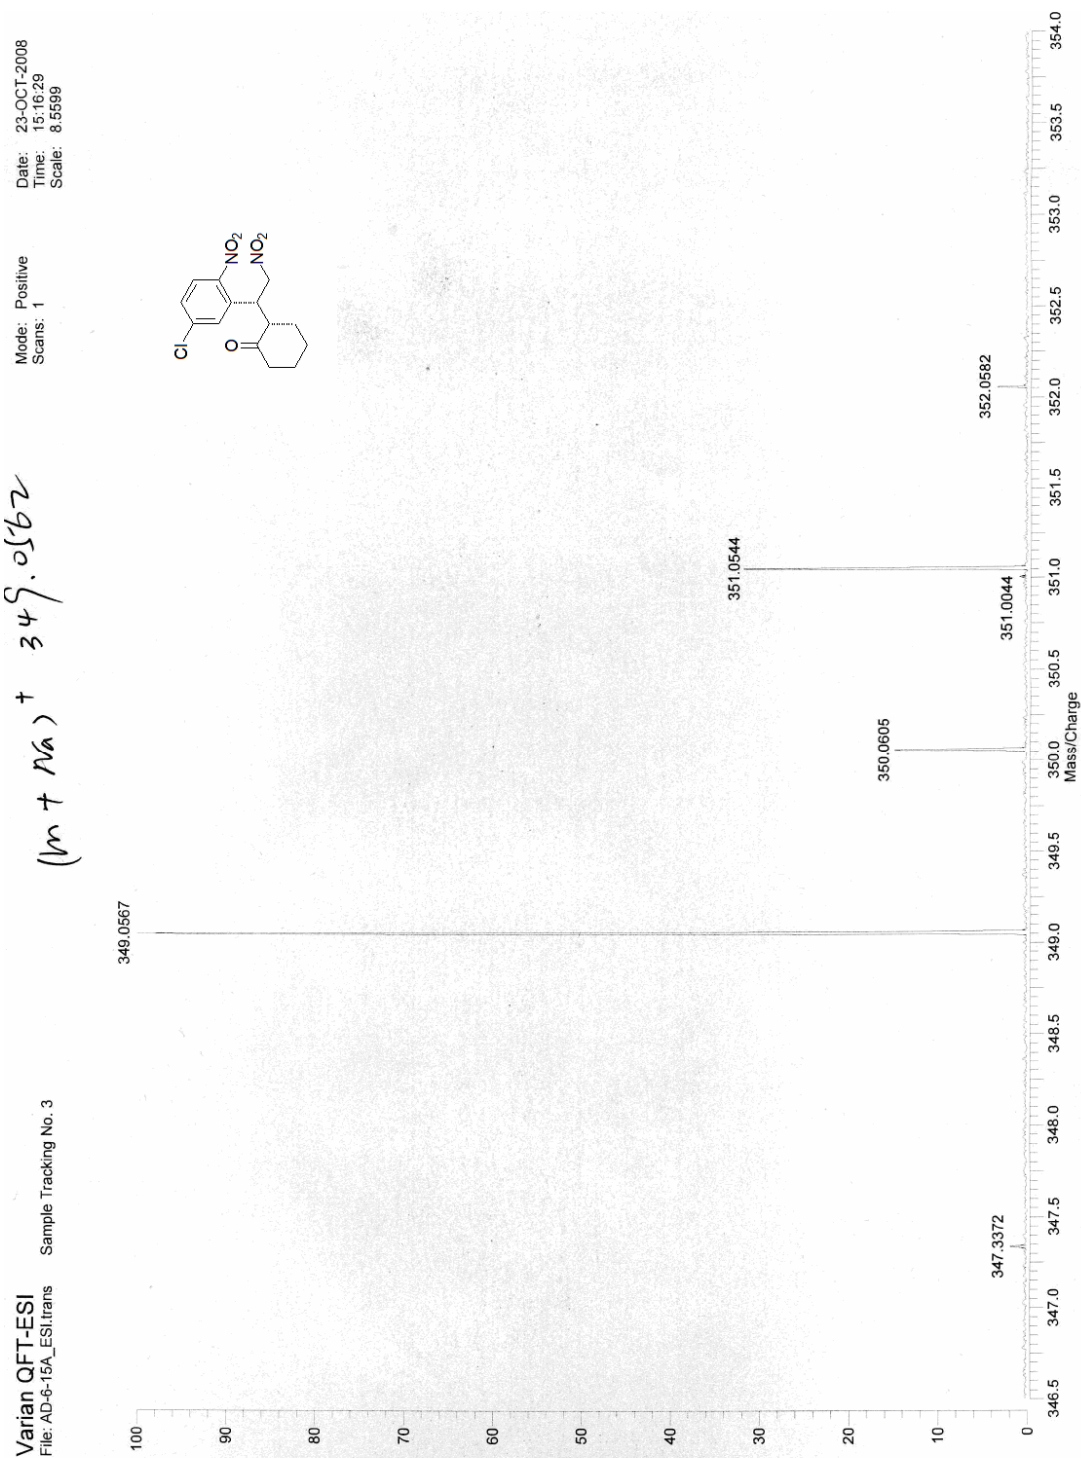



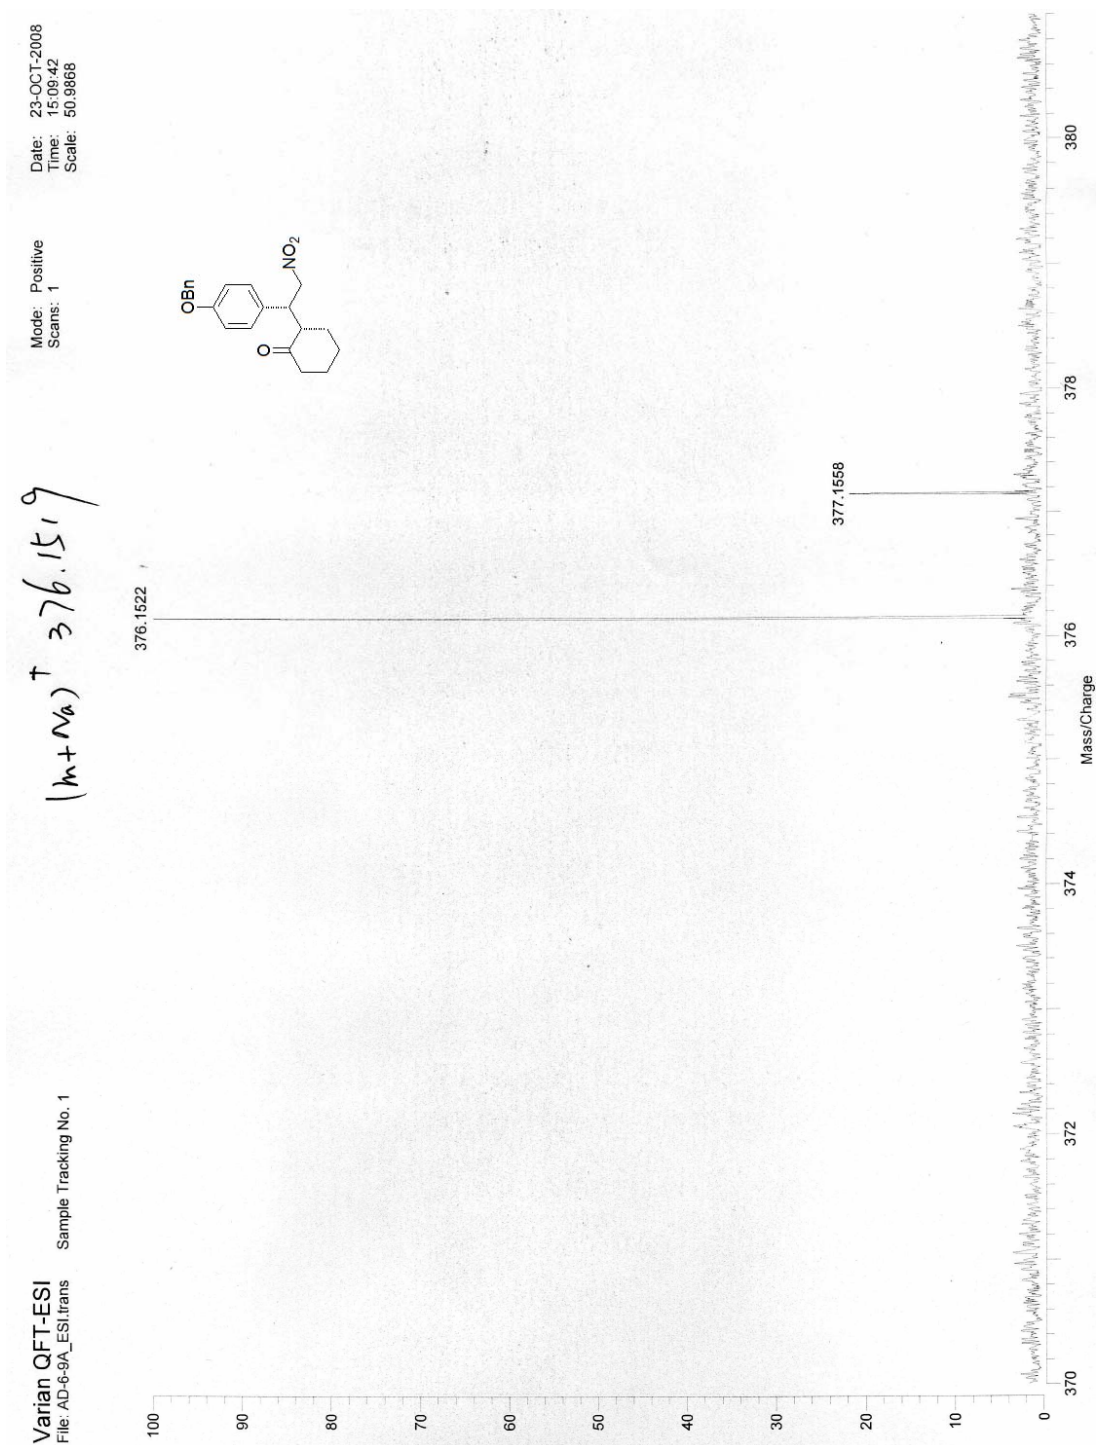

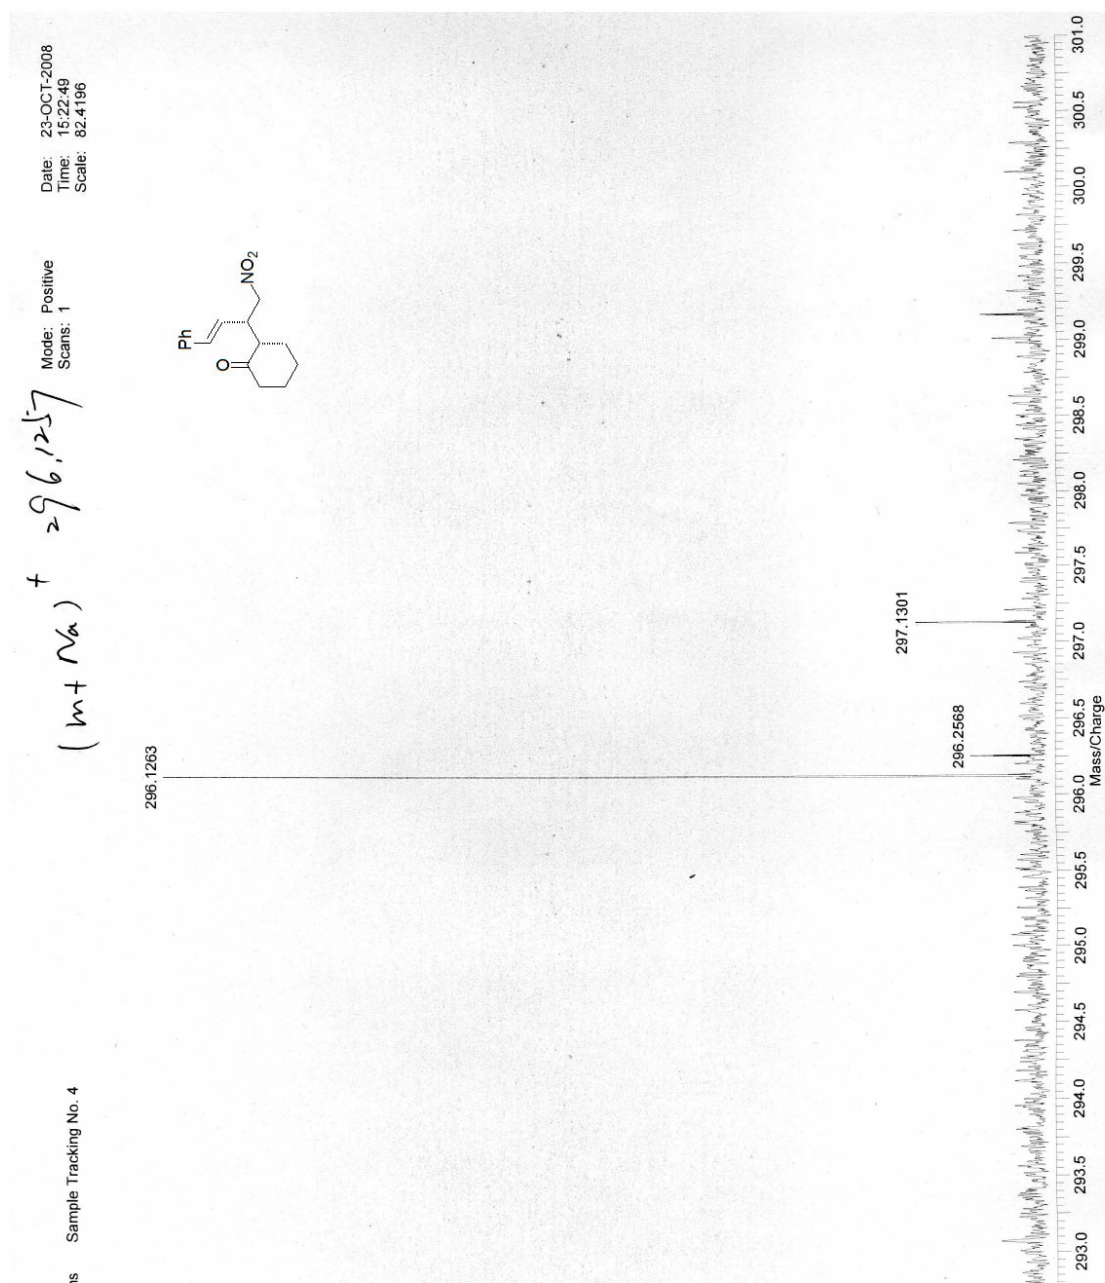

Mode: Positive  
Scans: 1

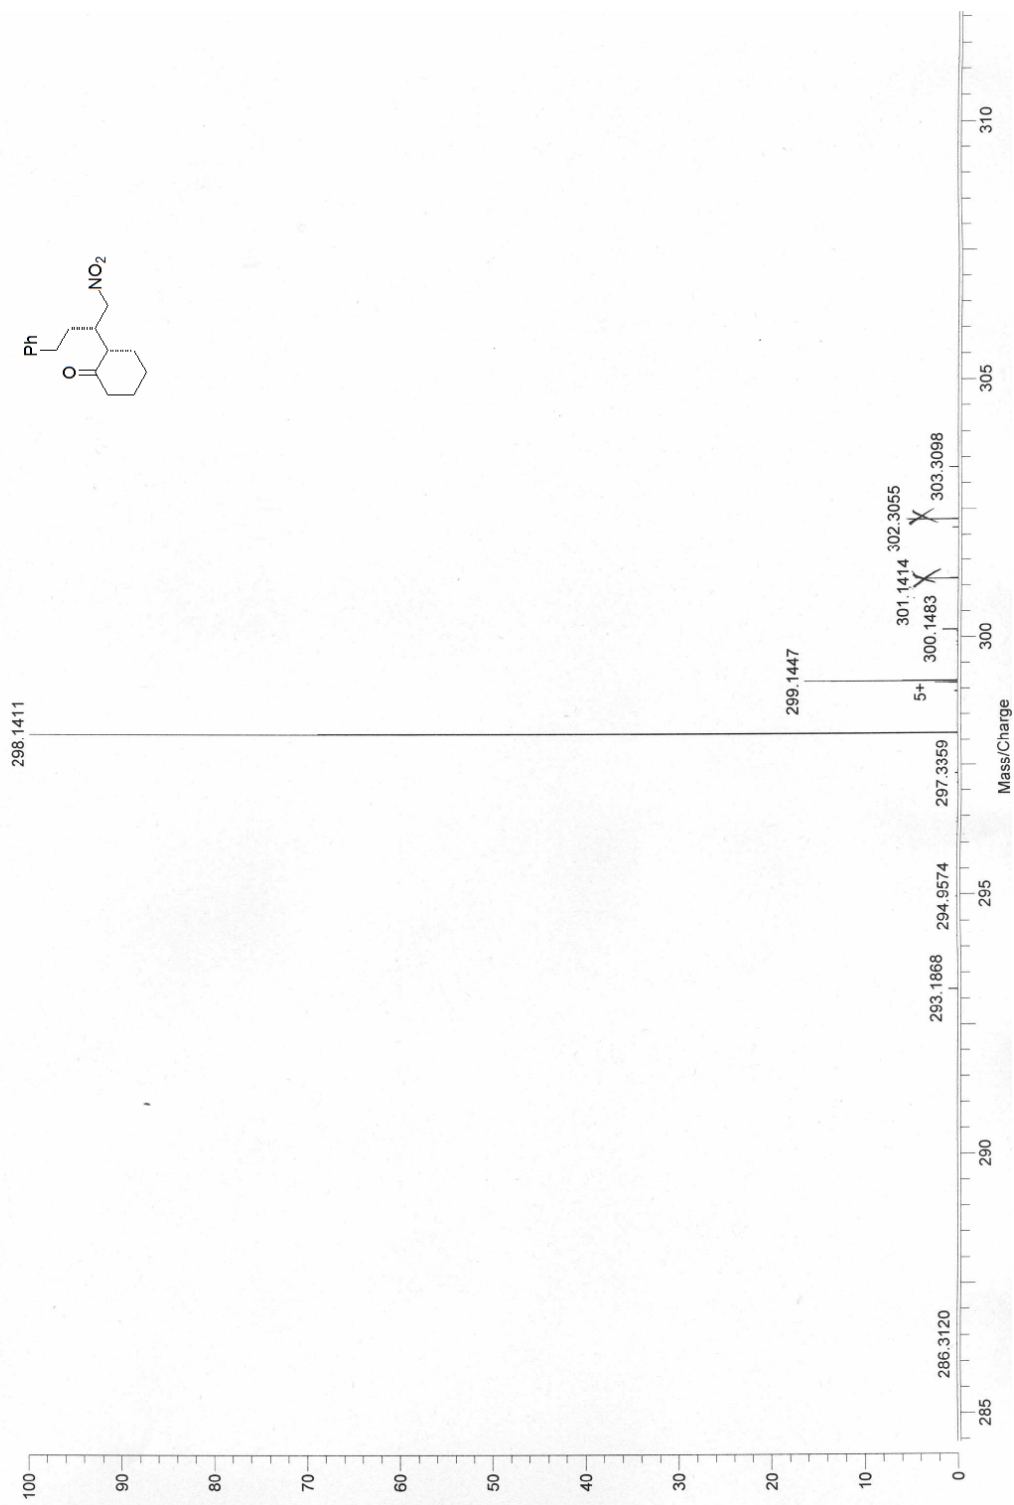

### 3. Copies of HPLC data

操作者 :  
仪器 : 仪器 2 位置 : 样品瓶 1  
进样日期 : 2008-7-25 11:08:27 上午  
采集方法 : D:\CHEM32\2\METHODS\DEF\_LC.M  
最后修改 : 2008-7-25 10:37:33 上午  
(调用后修改)  
分析方法 : D:\CHEM32\2\METHODS\DEF\_LC.M  
样品信息 : 85:15 AD-H 1ml/min

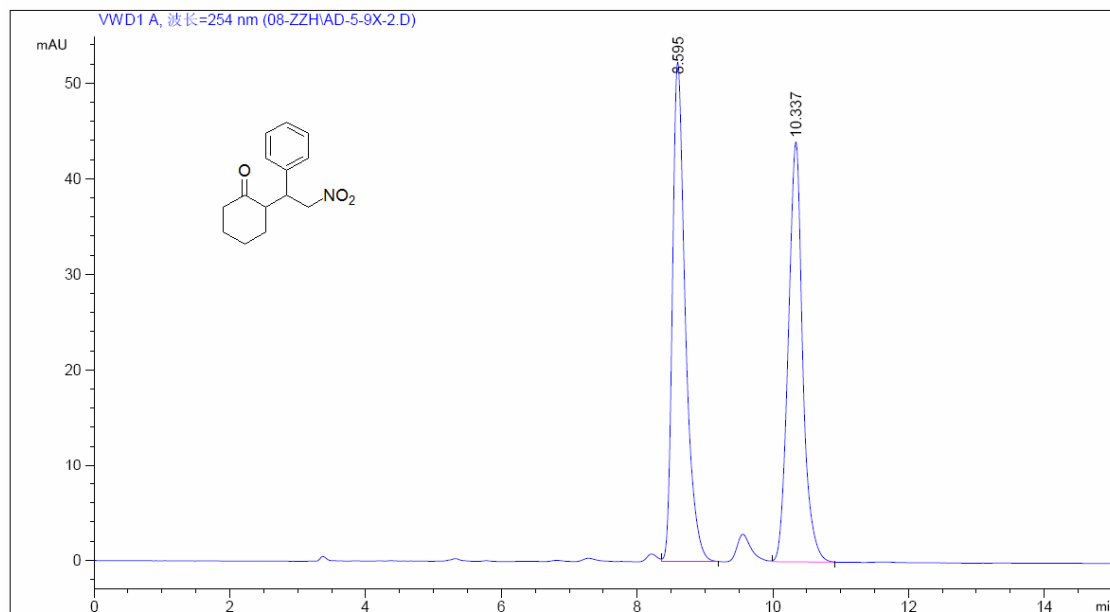

#### 面积百分比报告

排序 : 信号  
乘积因子 : 1.0000  
稀释因子 : 1.0000  
内标使用乘积因子和稀释因子

信号 1: VWD1 A, 波长=254 nm

| 峰 # | 保留时间 [min] | 类型 | 峰宽 [min] | 峰面积 mAU *s | 峰高 [mAU] | 峰面积 %   |
|-----|------------|----|----------|------------|----------|---------|
| 1   | 8.595      | VB | 0.1995   | 692.60132  | 52.35240 | 51.6037 |
| 2   | 10.337     | BB | 0.2216   | 649.55426  | 44.03545 | 48.3963 |

总量 : 1342.15558 96.38785

```
=====
操作者      :
仪器        : 仪器 2                      位置 : 样品瓶 1
进样日期    : 2008-7-18 11:16:32 上午
采集方法    : D:\CHEM32\2\METHODS\DEF_LC.M
最后修改    : 2008-7-18 11:11:46 上午
              (调用后修改)
分析方法    : D:\CHEM32\2\METHODS\DEF_LC.M
样品信息    : 85:15
=====
```

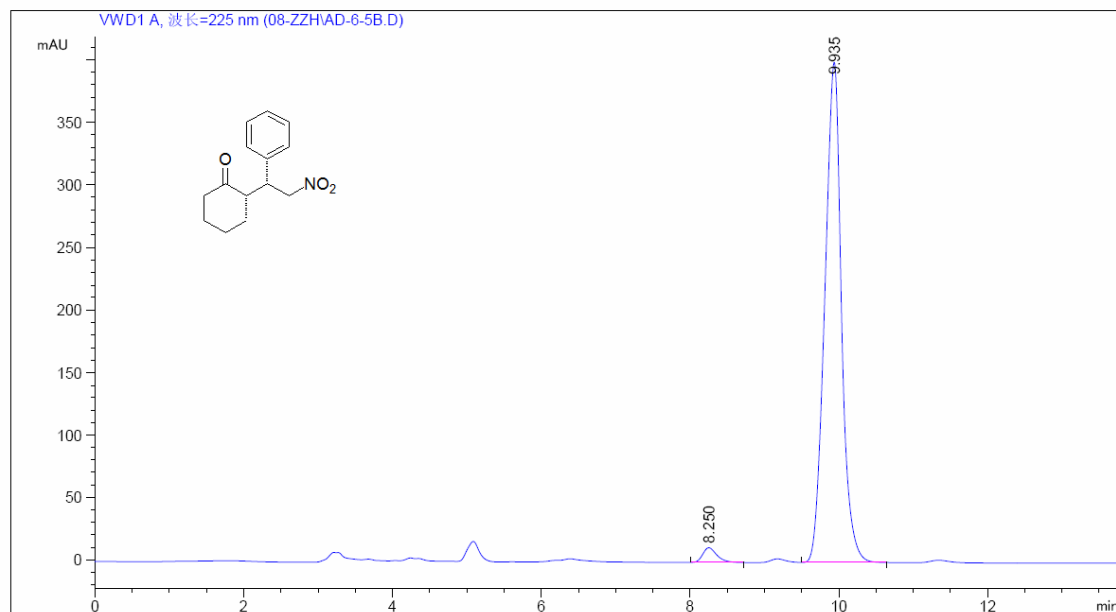

=====  
面积百分比报告  
=====

```
排序      : 信号
乘积因子   : 1.0000
稀释因子   : 1.0000
内标使用乘积因子和稀释因子
```

信号 1: VWD1 A, 波长=225 nm

| 峰 # | 保留时间 [min] | 类型 | 峰宽 [min] | 峰面积 mAU    | 峰高 [mAU]  | 峰面积 %   |
|-----|------------|----|----------|------------|-----------|---------|
| 1   | 8.250      | BB | 0.2008   | 154.86856  | 11.71980  | 2.4376  |
| 2   | 9.935      | VB | 0.2360   | 6198.44092 | 400.21255 | 97.5624 |

总量 : 6353.30948 411.93235

```

=====
操作者      :
仪器        : 仪器 2                      位置 : 样品瓶 1
进样日期    : 2008-8-26 4:24:17 下午
采集方法    : D:\CHEM32\2\METHODS\DEF_LC.M
最后修改    : 2008-8-26 4:20:03 下午
              (调用后修改)
分析方法    : D:\CHEM32\2\METHODS\DEF_LC.M
最后修改    : 2008-10-9 7:40:26 下午
              (调用后修改)
样品信息    : 10:90 0.7ml/min 254nm
=====
  
```

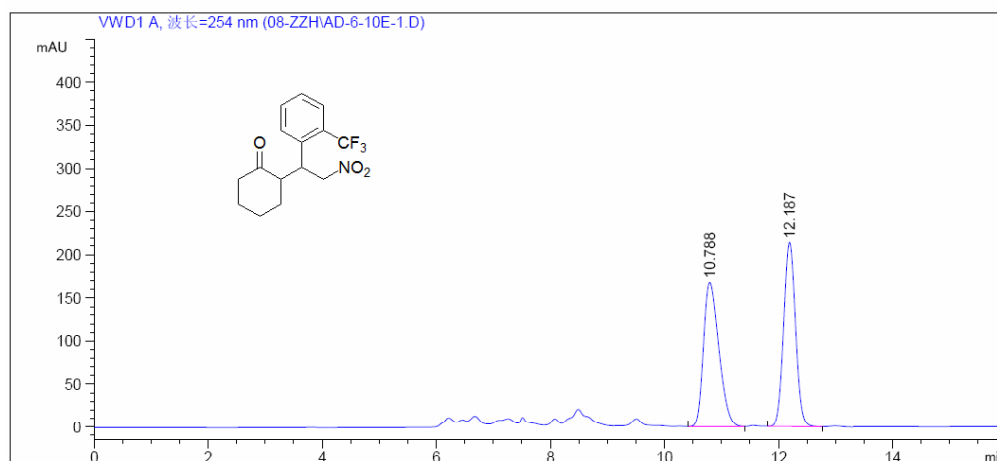

面积百分比报告

```

=====
排序      :      信号
乘积因子  :      1.0000
稀释因子  :      1.0000
内标使用乘积因子和稀释因子
=====
  
```

信号 1: VWD1 A, 波长=254 nm

| 峰 # | 保留时间 [min] | 类型 | 峰宽 [min] | 峰面积 mAU *s | 峰高 [mAU]  | 峰面积 %   |
|-----|------------|----|----------|------------|-----------|---------|
| 1   | 10.788     | BB | 0.2910   | 3135.48657 | 167.61678 | 50.0802 |
| 2   | 12.187     | VV | 0.2282   | 3125.44263 | 214.49406 | 49.9198 |

总量 : 6260.92920 382.11084

```

=====
操作者      :
仪器        : 仪器 2                      位置 : 样品瓶 1
进样日期    : 2008-8-26 4:01:26 下午
采集方法    : D:\CHEM32\2\METHODS\DEF_LC.M
最后修改    : 2008-8-26 3:59:49 下午
              (调用后修改)
分析方法    : D:\CHEM32\2\METHODS\DEF_LC.M
最后修改    : 2008-10-9 8:07:58 下午
              (调用后修改)
样品信息    : 10:90 0.7ml/min 254nm
=====
  
```

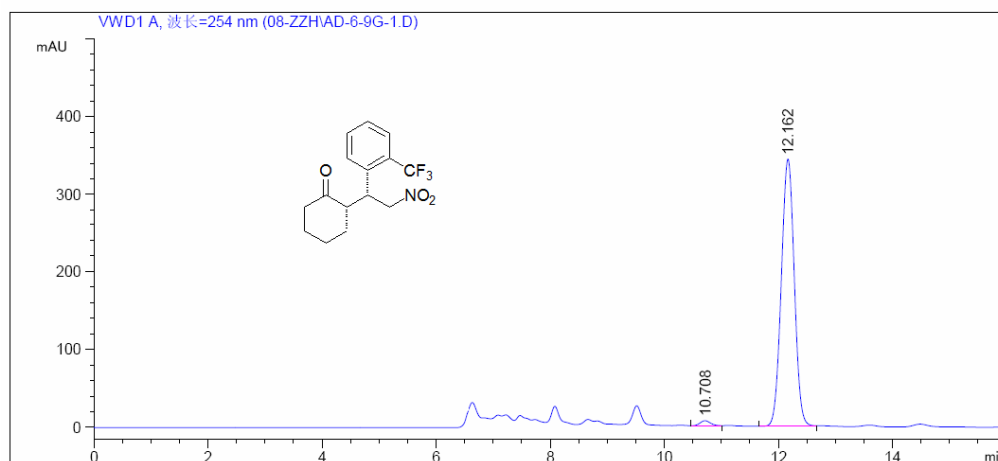

面积百分比报告

```

=====
排序      :      信号
乘积因子  :      1.0000
稀释因子  :      1.0000
内标使用乘积因子和稀释因子
=====
  
```

信号 1: VWD1 A, 波长=254 nm

| 峰 # | 保留时间 [min] | 类型 | 峰宽 [min] | 峰面积 mAU *s | 峰高 [mAU]  | 峰面积 %   |
|-----|------------|----|----------|------------|-----------|---------|
| 1   | 10.708     | BV | 0.1994   | 86.08102   | 6.57336   | 1.5587  |
| 2   | 12.162     | BV | 0.2483   | 5436.67334 | 344.30118 | 98.4413 |

```

=====
操作者      :
仪器        : 仪器 2                      位置 : 样品瓶 1
进样日期    : 2008-8-8 7:48:16 下午
采集方法    : D:\CHEM32\2\METHODS\DEF_LC.M
最后修改    : 2008-8-8 7:47:09 下午
              (调用后修改)
分析方法    : D:\CHEM32\2\METHODS\DEF_LC.M
最后修改    : 2008-10-6 4:11:26 下午
              (调用后修改)
样品信息    : 10:90 1.0ml/min 254nm 42bar
=====

```

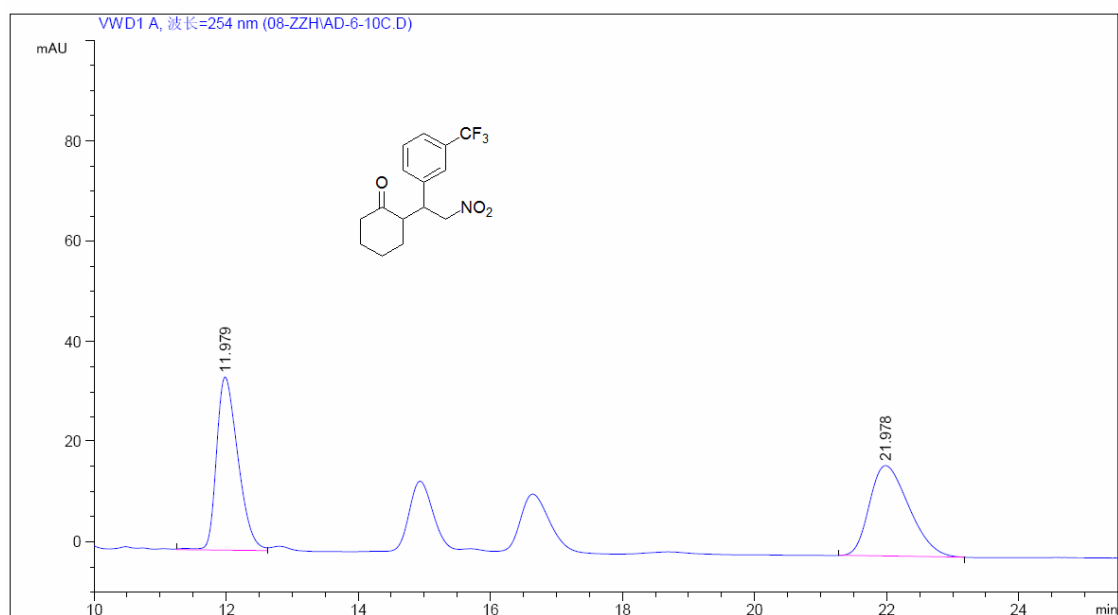

面积百分比报告

```

=====
排序      : 信号
乘积因子  : 1.0000
稀释因子  : 1.0000
内标使用乘积因子和稀释因子
=====

```

信号 1: VWD1 A, 波长=254 nm

| 峰 # | 保留时间 [min] | 类型 | 峰宽 [min] | 峰面积 mAU *s | 峰高 [mAU] | 峰面积 %   |
|-----|------------|----|----------|------------|----------|---------|
| 1   | 11.979     | BV | 0.3493   | 782.91608  | 34.67413 | 51.0240 |
| 2   | 21.978     | BB | 0.6447   | 751.49225  | 18.03920 | 48.9760 |

总量 : 1534.40833 52.71333



```
=====
操作者      :
仪器        : 仪器 2                      位置 : 样品瓶 1
进样日期    : 2008-9-12 9:31:06 下午
采集方法    : D:\CHEM32\2\METHODS\DEF_LC.M
最后修改    : 2008-9-12 9:26:48 下午
              (调用后修改)
分析方法    : D:\CHEM32\2\METHODS\DEF_LC.M
最后修改    : 2008-10-8 9:10:20 下午
              (调用后修改)
样品信息    : 10:90 AS-H 1ml/min 254nm
=====
```

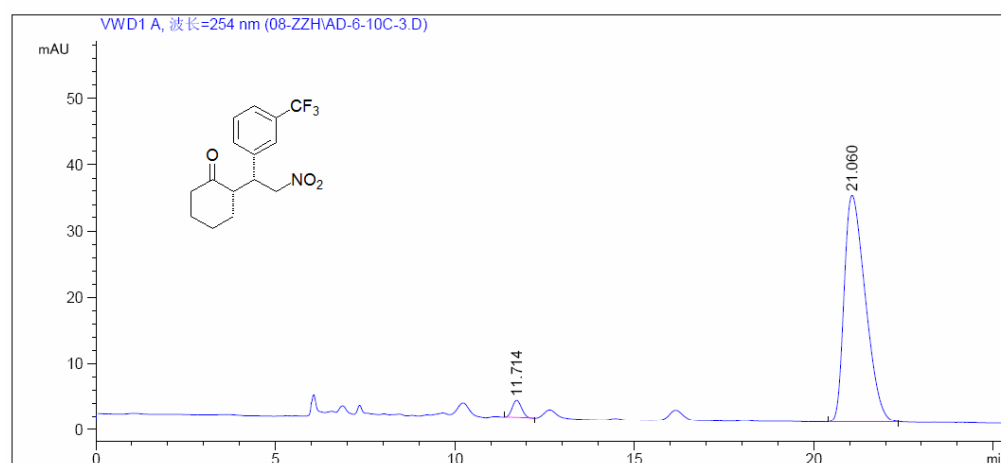

面积百分比报告

```
=====
排序      : 信号
乘积因子  : 1.0000
稀释因子  : 1.0000
内标使用乘积因子和稀释因子
=====
```

信号 1: VWD1 A, 波长=254 nm

| 峰 # | 保留时间 [min] | 类型 | 峰宽 [min] | 峰面积 mAU *s | 峰高 [mAU] | 峰面积 %   |
|-----|------------|----|----------|------------|----------|---------|
| 1   | 11.714     | BB | 0.2886   | 48.13490   | 2.62008  | 3.3101  |
| 2   | 21.060     | BB | 0.6366   | 1406.02673 | 34.21813 | 96.6899 |

总量 : 1454.16163 36.83821

```
=====
操作者      :
仪器        : 仪器 2                      位置 : 样品瓶 1
进样日期    : 2008-8-8 6:57:27 下午
采集方法    : D:\CHEM32\2\METHODS\DEF_LC.M
最后修改    : 2008-8-8 6:56:27 下午
              (调用后修改)
分析方法    : D:\CHEM32\2\METHODS\DEF_LC.M
最后修改    : 2008-10-9 8:15:21 下午
              (调用后修改)
样品信息    : 10:90 1.0ml/min 254nm 42bar
=====
```

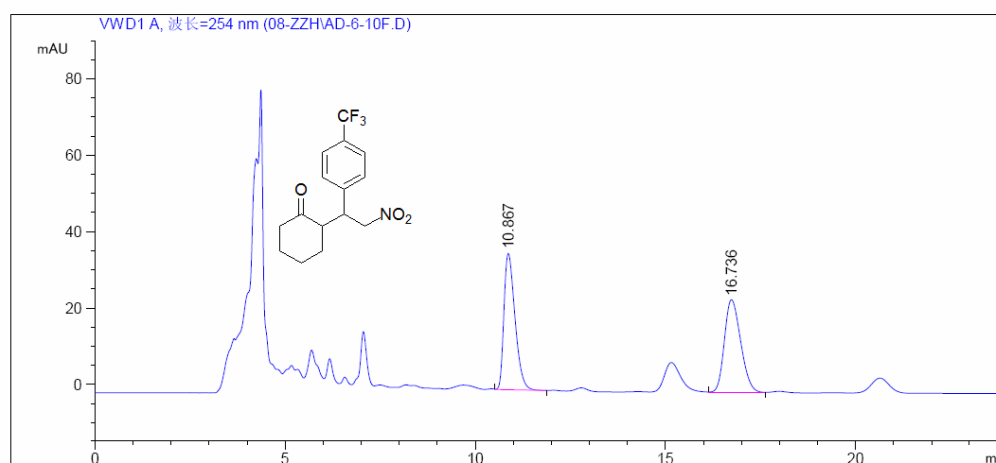

面积百分比报告

```
=====
排序      :      信号
乘积因子   :      1.0000
稀释因子   :      1.0000
内标使用乘积因子和稀释因子
=====
```

信号 1: VWD1 A, 波长=254 nm

| 峰 # | 保留时间 [min] | 类型 | 峰宽 [min] | 峰面积 mAU *s | 峰高 [mAU] | 峰面积 %   |
|-----|------------|----|----------|------------|----------|---------|
| 1   | 10.867     | VV | 0.3152   | 725.36426  | 35.77193 | 49.9744 |
| 2   | 16.736     | VV | 0.4673   | 726.10773  | 24.34729 | 50.0256 |

总量 : 1451.47198 60.11922

\*\*\* 报告结束 \*\*\*

```

=====
操作者      :
仪器        : 仪器 2                      位置 : 样品瓶 1
进样日期    : 2008-8-8 7:22:34 下午
采集方法    : D:\CHEM32\2\METHODS\DEF_LC.M
最后修改    : 2008-8-8 7:21:55 下午
              (调用后修改)
分析方法    : D:\CHEM32\2\METHODS\DEF_LC.M
最后修改    : 2008-10-10 10:42:59 上午
              (调用后修改)
样品信息    : 10:90 1.0ml/min 254nm 42bar
=====
  
```

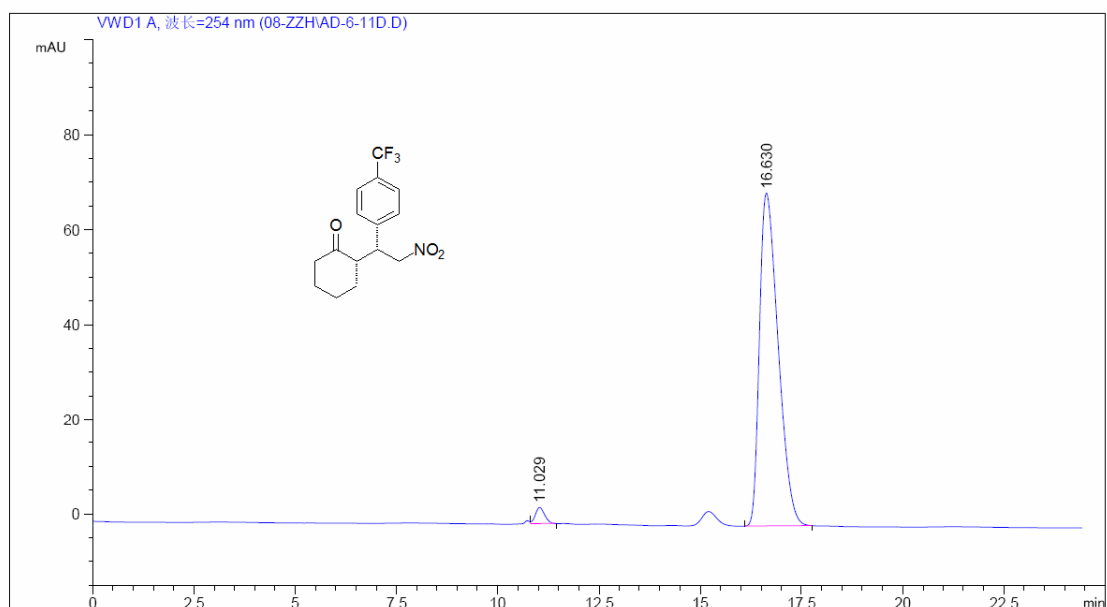

面积百分比报告

```

=====
排序      :      信号
乘积因子   :      1.0000
稀释因子   :      1.0000
内标使用乘积因子和稀释因子
  
```

信号 1: VWD1 A, 波长=254 nm

| 峰 # | 保留时间 [min] | 类型 | 峰宽 [min] | 峰面积 mAU * s | 峰高 [mAU] | 峰面积 %   |
|-----|------------|----|----------|-------------|----------|---------|
| 1   | 11.029     | VB | 0.2478   | 55.36341    | 3.43312  | 2.3998  |
| 2   | 16.630     | BB | 0.4978   | 2251.61743  | 70.22929 | 97.6002 |

总量 : 2306.98085 73.66241

```

=====
操作者      :
仪器        : 仪器 2                      位置 : 样品瓶 1
进样日期    : 2008-9-13 9:01:27 上午
采集方法    : D:\CHEM32\2\METHODS\DEF_LC.M
最后修改    : 2008-9-13 8:36:10 上午
              (调用后修改)
分析方法    : D:\CHEM32\2\METHODS\DEF_LC.M
最后修改    : 2008-10-6 4:17:35 下午
              (调用后修改)
样品信息    : 10:90 AS-H 1ml/min   254nm
=====
  
```

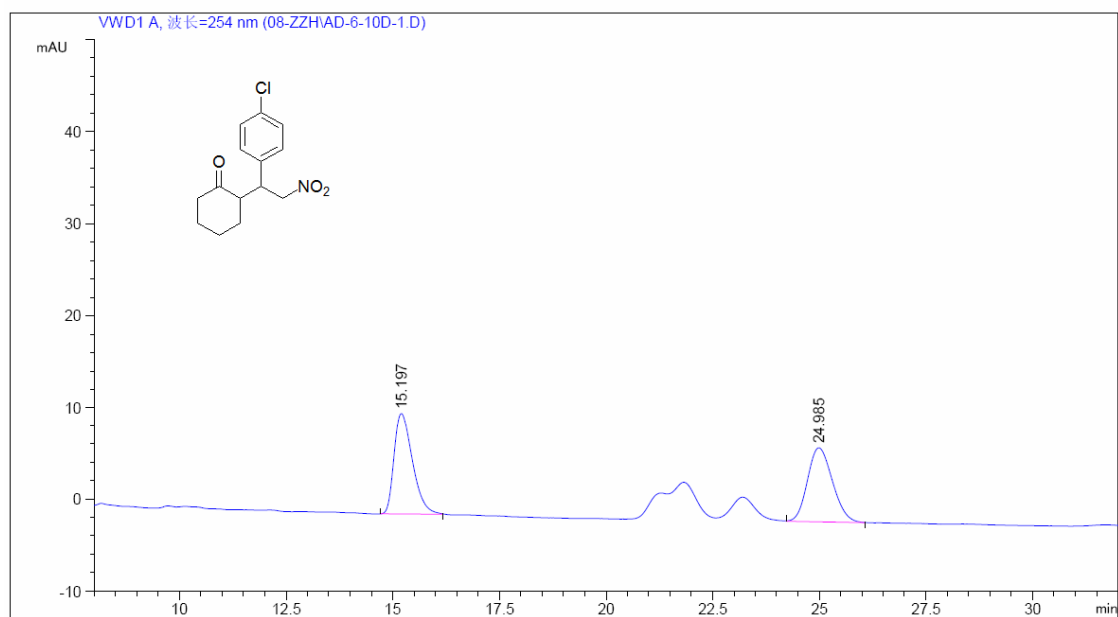

面积百分比报告

```

=====
排序      :      信号
乘积因子  :      1.0000
稀释因子  :      1.0000
内标使用乘积因子和稀释因子
=====
  
```

信号 1: VWD1 A, 波长=254 nm

| 峰 # | 保留时间 [min] | 类型 | 峰宽 [min] | 峰面积 mAU *s | 峰高 [mAU] | 峰面积 %   |
|-----|------------|----|----------|------------|----------|---------|
| 1   | 15.197     | BB | 0.4598   | 331.49066  | 11.03015 | 50.2783 |
| 2   | 24.985     | BB | 0.6370   | 327.82047  | 8.04587  | 49.7217 |

总量 : 659.31113 19.07602

```

=====
操作者      :
仪器        : 仪器 2                      位置 : 样品瓶 1
进样日期    : 2008-7-30 2:02:11 上午
采集方法    : D:\CHEM32\2\METHODS\DEF_LC.M
最后修改    : 2008-7-30 2:01:18 上午
              (调用后修改)
分析方法    : D:\CHEM32\2\METHODS\DEF_LC.M
最后修改    : 2008-10-8 9:06:31 下午
              (调用后修改)
样品信息    : 90:10   AS-H   1.0ml/min  254nm
=====
  
```

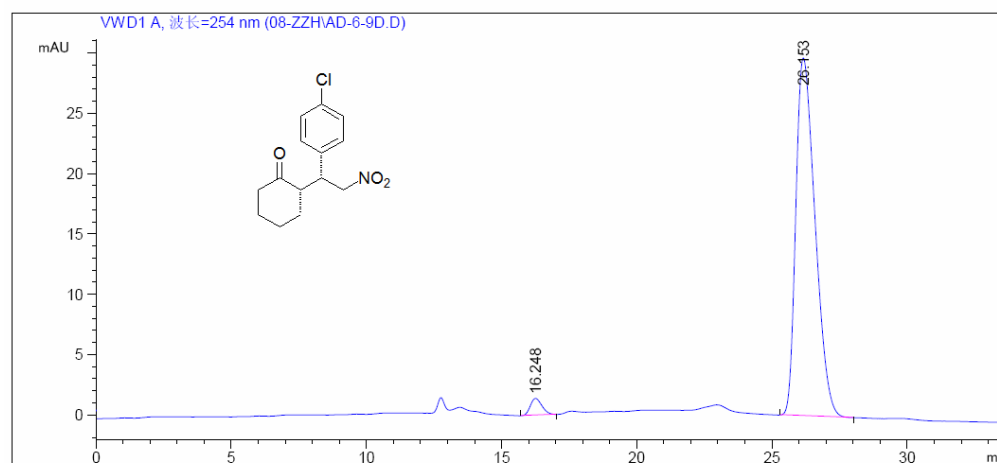

面积百分比报告

```

=====
排序      :      信号
乘积因子  :      1.0000
稀释因子  :      1.0000
内标使用乘积因子和稀释因子
=====
  
```

信号 1: VWD1 A, 波长=254 nm

| 峰 # | 保留时间 [min] | 类型 | 峰宽 [min] | 峰面积 mAU *s | 峰高 [mAU] | 峰面积 %   |
|-----|------------|----|----------|------------|----------|---------|
| 1   | 16.248     | BV | 0.4664   | 41.77210   | 1.39289  | 2.7710  |
| 2   | 26.153     | BB | 0.7687   | 1465.68787 | 29.65858 | 97.2290 |

总量 : 1507.45997 31.05146

```

=====
操作者      :
仪器        : 仪器 2                      位置 : 样品瓶 1
进样日期    : 2008-7-29 7:53:05 下午
采集方法    : D:\CHEM32\2\METHODS\DEF_LC.M
最后修改    : 2008-7-29 7:51:02 下午
              (调用后修改)
分析方法    : D:\CHEM32\2\METHODS\DEF_LC.M
最后修改    : 2008-10-6 4:30:56 下午
              (调用后修改)
样品信息    : 90:10   AS-H 0.7ml/min 238nm
=====
  
```

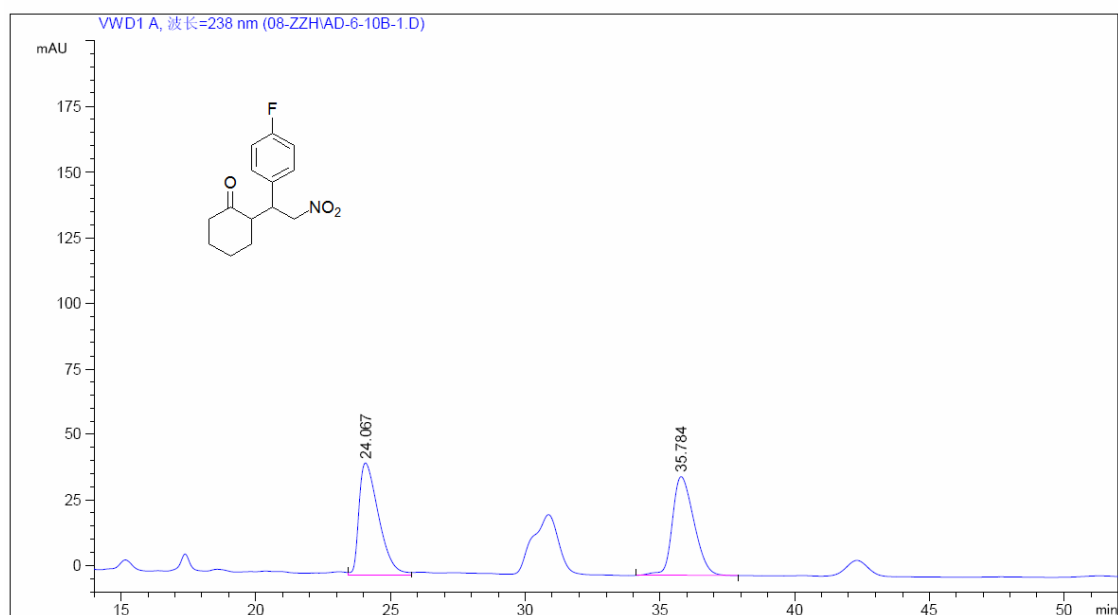

面积百分比报告

```

=====
排序      :      信号
乘积因子  :      1.0000
稀释因子  :      1.0000
内标使用乘积因子和稀释因子
=====
  
```

信号 1: VWD1 A, 波长=238 nm

| 峰 # | 保留时间 [min] | 类型 | 峰宽 [min] | 峰面积 mAU *s | 峰高 [mAU] | 峰面积 %   |
|-----|------------|----|----------|------------|----------|---------|
| 1   | 24.067     | VV | 0.7840   | 2155.69507 | 42.49733 | 50.7066 |
| 2   | 35.784     | BB | 0.8674   | 2095.61450 | 37.50423 | 49.2934 |

总量 : 4251.30957 80.00156

```

=====
操作者      :
仪器        : 仪器 2                      位置 : 样品瓶 1
进样日期    : 2008-7-29 9:49:19 下午
采集方法    : D:\CHEM32\2\METHODS\DEF_LC.M
最后修改    : 2008-7-29 9:48:04 下午
              (调用后修改)
分析方法    : D:\CHEM32\2\METHODS\DEF_LC.M
最后修改    : 2008-10-6 4:08:04 下午
              (调用后修改)
样品信息    : 90:10   AS-H 0.7ml/min 238nm
=====
  
```

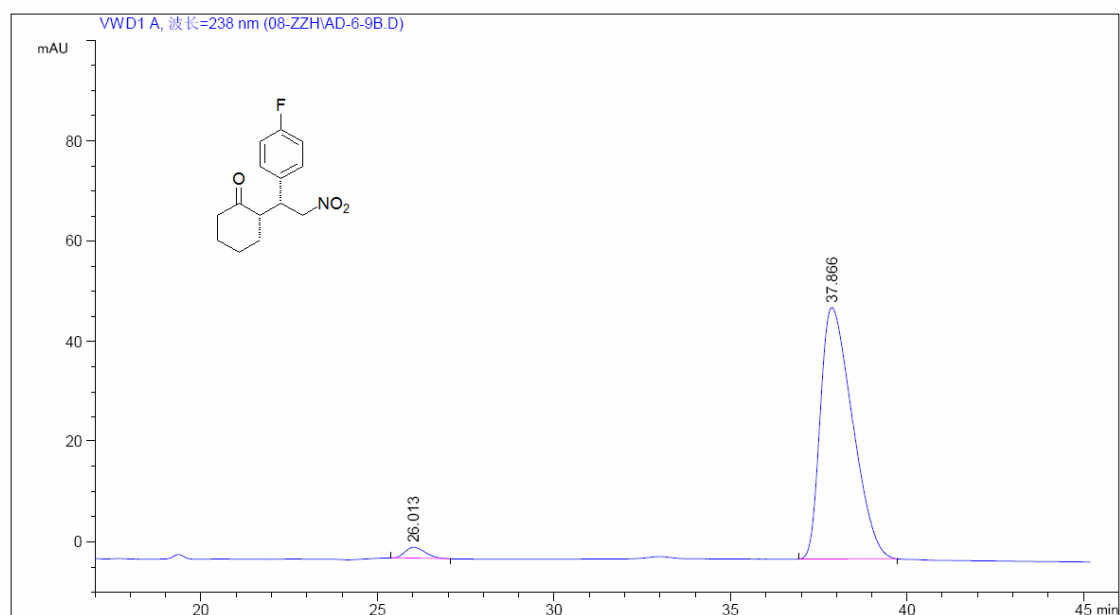

面积百分比报告

```

=====
排序      :      信号
乘积因子  :      1.0000
稀释因子  :      1.0000
内标使用乘积因子和稀释因子
=====
  
```

信号 1: VWD1 A, 波长=238 nm

| 峰 # | 保留时间 [min] | 类型 | 峰宽 [min] | 峰面积 mAU *s | 峰高 [mAU] | 峰面积 %   |
|-----|------------|----|----------|------------|----------|---------|
| 1   | 26.013     | BB | 0.5848   | 89.15659   | 2.20734  | 2.7358  |
| 2   | 37.866     | BB | 0.9702   | 3169.71973 | 50.26116 | 97.2642 |

总量 : 3258.87632 52.46849

```
=====
操作者      :
仪器        : 仪器 2                      位置 : 样品瓶 1
进样日期    : 2008-10-21 10:41:57 上午
采集方法    : D:\CHEM32\2\METHODS\DEF_LC.M
最后修改    : 2008-10-21 10:36:33 上午
              (调用后修改)
分析方法    : D:\CHEM32\2\METHODS\DEF_LC.M
最后修改    : 2008-10-21 6:25:15 下午
              (调用后修改)
样品信息    : hex:iso90:10 0.8ml/min AS-H 238nm
=====
```

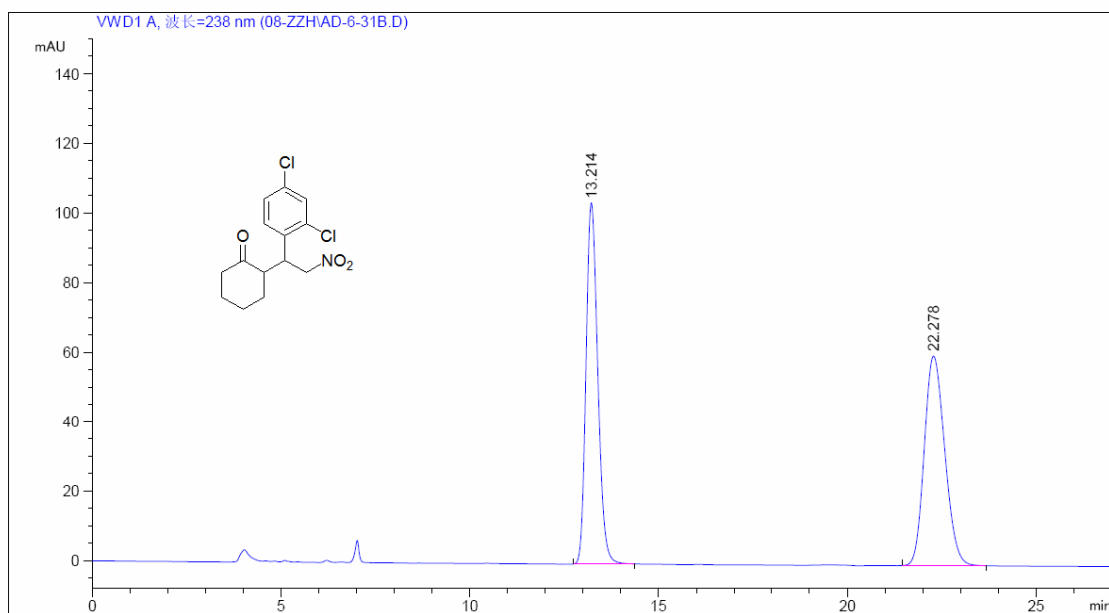

面积百分比报告

```
=====
排序      : 信号
乘积因子  : 1.0000
稀释因子  : 1.0000
内标使用乘积因子和稀释因子
=====
```

信号 1: VWD1 A, 波长=238 nm

| 峰 # | 保留时间 [min] | 类型 | 峰宽 [min] | 峰面积 mAU *s | 峰高 [mAU]  | 峰面积 %   |
|-----|------------|----|----------|------------|-----------|---------|
| 1   | 13.214     | BB | 0.3365   | 2246.92261 | 103.98386 | 49.6098 |
| 2   | 22.278     | BB | 0.5888   | 2282.27246 | 60.48099  | 50.3902 |

总量 : 4529.19507 164.46485



```
=====
操作者      :
仪器        : 仪器 2                      位置 : 样品瓶 1
进样日期    : 2008-10-21 3:21:38 下午
采集方法    : D:\CHEM32\2\METHODS\DEF_LC.M
最后修改    : 2008-10-21 3:02:41 下午
              (调用后修改)
分析方法    : D:\CHEM32\2\METHODS\DEF_LC.M
最后修改    : 2008-10-21 6:29:37 下午
              (调用后修改)
样品信息    : hex:iso90:10 0.8ml/min AS-H 238nm
=====
```

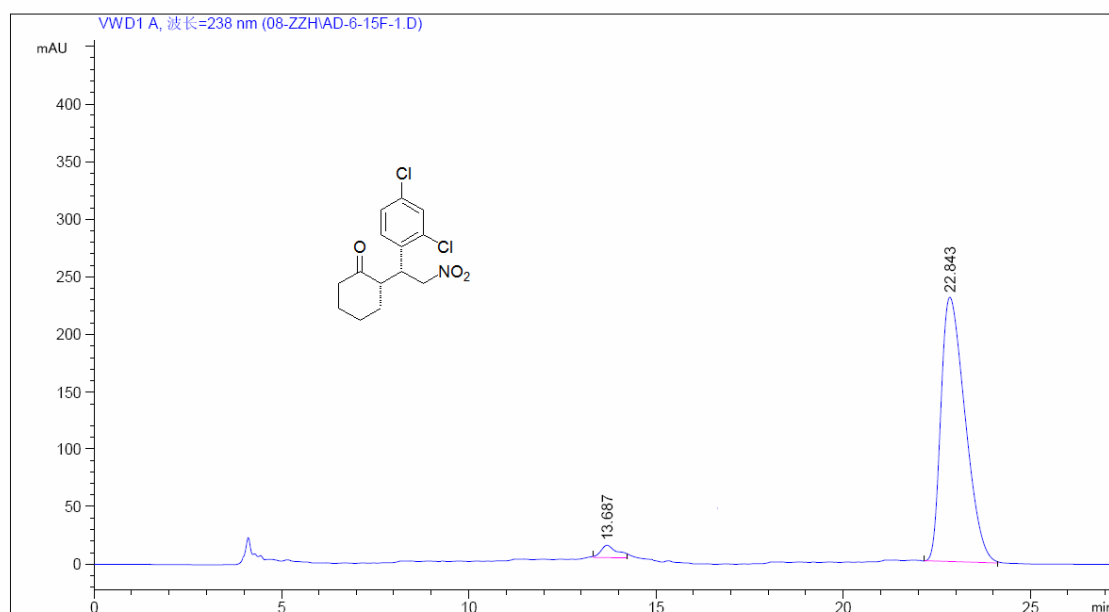

=====  
面积百分比报告  
=====

```
排序      :      信号
乘积因子   :      1.0000
稀释因子   :      1.0000
内标使用乘积因子和稀释因子
```

信号 1: VWD1 A, 波长=238 nm

| 峰 # | 保留时间 [min] | 类型 | 峰宽 [min] | 峰面积 mAU *s | 峰高 [mAU]  | 峰面积 %   |
|-----|------------|----|----------|------------|-----------|---------|
| 1   | 13.687     | BB | 0.4451   | 342.36972  | 10.98537  | 3.2076  |
| 2   | 22.843     | VB | 0.7010   | 1.03314e4  | 230.28918 | 96.7924 |

总量 : 1.06738e4 241.27455

```

=====
操作者      :
仪器        : 仪器 2                      位置 : 样品瓶 1
进样日期    : 2008-10-22 10:30:56 上午
采集方法    : D:\CHEM32\2\METHODS\DEF_LC.M
最后修改    : 2008-10-22 10:05:16 上午
              (调用后修改)
分析方法    : D:\CHEM32\2\METHODS\DEF_LC.M
最后修改    : 2008-10-22 2:20:31 下午
              (调用后修改)
样品信息    : hex:iso95:5 0.7ml/min AD-H 220nm
=====
  
```

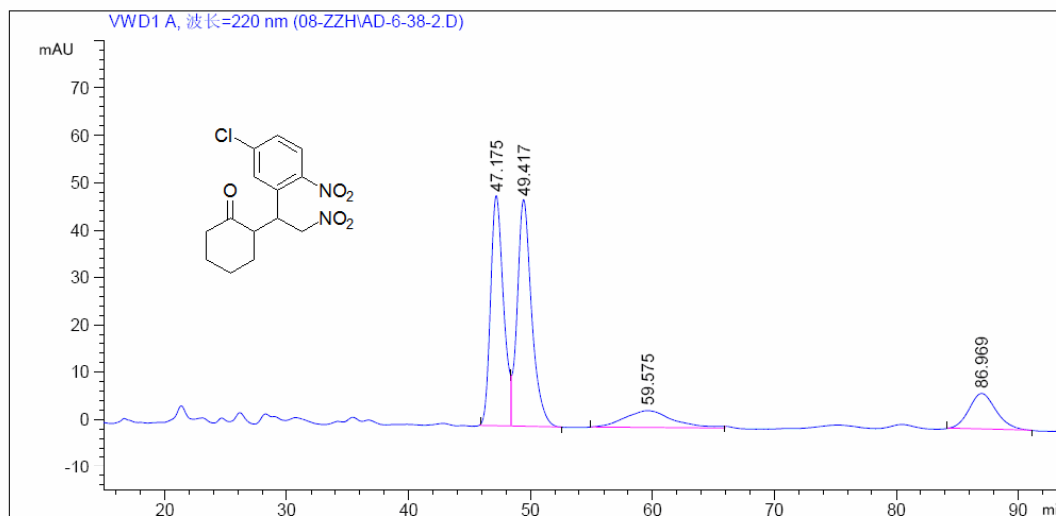

面积百分比报告

```

=====
排序      :      信号
乘积因子  :      1.0000
稀释因子  :      1.0000
内标使用乘积因子和稀释因子
=====
  
```

信号 1: VWD1 A, 波长=220 nm

| 峰 # | 保留时间 [min] | 类型 | 峰宽 [min] | 峰面积 mAU *s | 峰高 [mAU] | 峰面积 %   |
|-----|------------|----|----------|------------|----------|---------|
| 1   | 47.175     | BV | 1.1385   | 3568.66431 | 48.46941 | 36.6485 |
| 2   | 49.417     | VB | 1.2515   | 3965.72119 | 47.60372 | 40.7260 |
| 3   | 59.575     | BB | 3.9942   | 1024.16028 | 3.62595  | 10.5176 |
| 4   | 86.969     | BB | 2.3783   | 1179.00916 | 7.56115  | 12.1079 |

总量 : 9737.55493 107.26024

\*\*\* 报告结束 \*\*\*

```
=====
操作者      :
仪器        : 仪器 2                      位置 : 样品瓶 1
进样日期    : 2008-10-22 12:16:46 下午
采集方法    : D:\CHEM32\2\METHODS\DEF_LC.M
最后修改    : 2008-10-22 12:16:12 下午
              (调用后修改)
分析方法    : D:\CHEM32\2\METHODS\DEF_LC.M
最后修改    : 2008-10-22 2:10:22 下午
              (调用后修改)
样品信息    : hex:iso95:5 0.7ml/min AD-H 220nm
=====
```

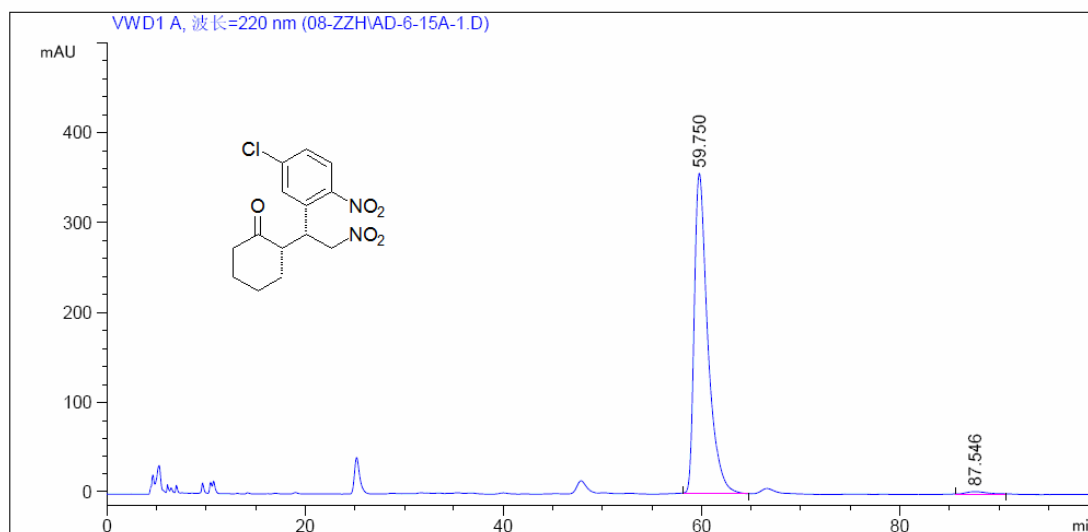

面积百分比报告

```
=====
排序      :      信号
乘积因子  :      1.0000
稀释因子  :      1.0000
内标使用乘积因子和稀释因子
=====
```

信号 1: VWD1 A, 波长=220 nm

| 峰 # | 保留时间 [min] | 类型 | 峰宽 [min] | 峰面积 mAU *s | 峰高 [mAU]  | 峰面积 %   |
|-----|------------|----|----------|------------|-----------|---------|
| 1   | 59.750     | BB | 1.4264   | 3.40469e4  | 357.24890 | 98.6636 |
| 2   | 87.546     | BB | 2.3035   | 461.16180  | 2.94662   | 1.3364  |

总量 : 3.45080e4 360.19552

\*\*\* 报告结束 \*\*\*

```

=====
操作者      :
仪器        : 仪器 2                      位置 : 样品瓶 1
进样日期    : 2008-8-8 4:38:29 下午
采集方法    : D:\CHEM32\2\METHODS\DEF_LC.M
最后修改    : 2008-8-8 4:36:58 下午
              (调用后修改)
分析方法    : D:\CHEM32\2\METHODS\DEF_LC.M
最后修改    : 2008-10-9 8:09:52 下午
              (调用后修改)
样品信息    : 10:90 1.0ml/min 254nm 42bar
=====
  
```

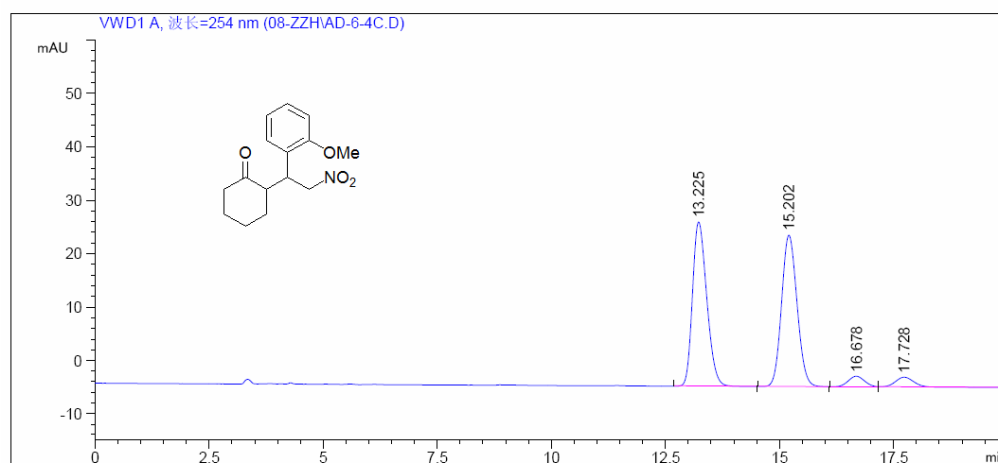

面积百分比报告

```

=====
排序      :      信号
乘积因子  :      1.0000
稀释因子  :      1.0000
内标使用乘积因子和稀释因子
=====
  
```

信号 1: VWD1 A, 波长=254 nm

| 峰 # | 保留时间 [min] | 类型  | 峰宽 [min] | 峰面积 mAU *s | 峰高 [mAU] | 峰面积 %   |
|-----|------------|-----|----------|------------|----------|---------|
| 1   | 13.225     | BB  | 0.3382   | 669.06195  | 30.75567 | 46.5181 |
| 2   | 15.202     | BB  | 0.3679   | 667.46643  | 28.34374 | 46.4071 |
| 3   | 16.678     | BV  | 0.3836   | 49.00926   | 1.98841  | 3.4075  |
| 4   | 17.728     | VBA | 0.4393   | 52.74632   | 1.83970  | 3.6673  |

总量 : 1438.28395 62.92752

\*\*\* 报告结束 \*\*\*

```
=====
操作者      :
仪器        : 仪器 2                      位置 : 样品瓶 1
进样日期    : 2008-8-8 4:59:52 下午
采集方法    : D:\CHEM32\2\METHODS\DEF_LC.M
最后修改    : 2008-8-8 4:59:04 下午
              (调用后修改)
分析方法    : D:\CHEM32\2\METHODS\DEF_LC.M
最后修改    : 2008-10-10 10:34:55 上午
              (调用后修改)
样品信息    : 10:90 1.0ml/min 254nm 42bar
=====
```

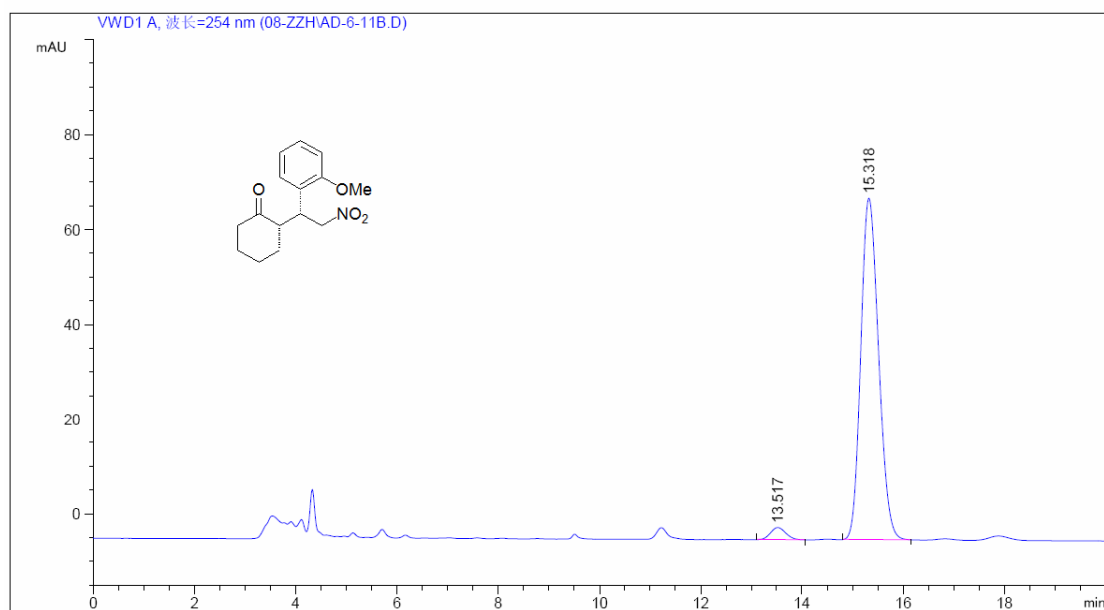

面积百分比报告

```
=====
排序      : 信号
乘积因子  : 1.0000
稀释因子  : 1.0000
内标使用乘积因子和稀释因子
=====
```

信号 1: VWD1 A, 波长=254 nm

| 峰 # | 保留时间 [min] | 类型 | 峰宽 [min] | 峰面积 mAU *s | 峰高 [mAU] | 峰面积 %   |
|-----|------------|----|----------|------------|----------|---------|
| 1   | 13.517     | BB | 0.3273   | 53.92971   | 2.55998  | 2.9826  |
| 2   | 15.318     | BB | 0.3818   | 1754.24060 | 71.99871 | 97.0174 |

总量 : 1808.17031 74.55869

```
=====
操作者      :
仪器        : 仪器 2                      位置 : 样品瓶 1
进样日期    : 2008-8-8 8:43:58 下午
采集方法    : D:\CHEM32\2\METHODS\DEF_LC.M
最后修改    : 2008-8-8 8:42:48 下午
              (调用后修改)
分析方法    : D:\CHEM32\2\METHODS\DEF_LC.M
最后修改    : 2008-10-6 4:40:27 下午
              (调用后修改)
样品信息    : 10:90 1.0ml/min 254nm 42bar
=====
```

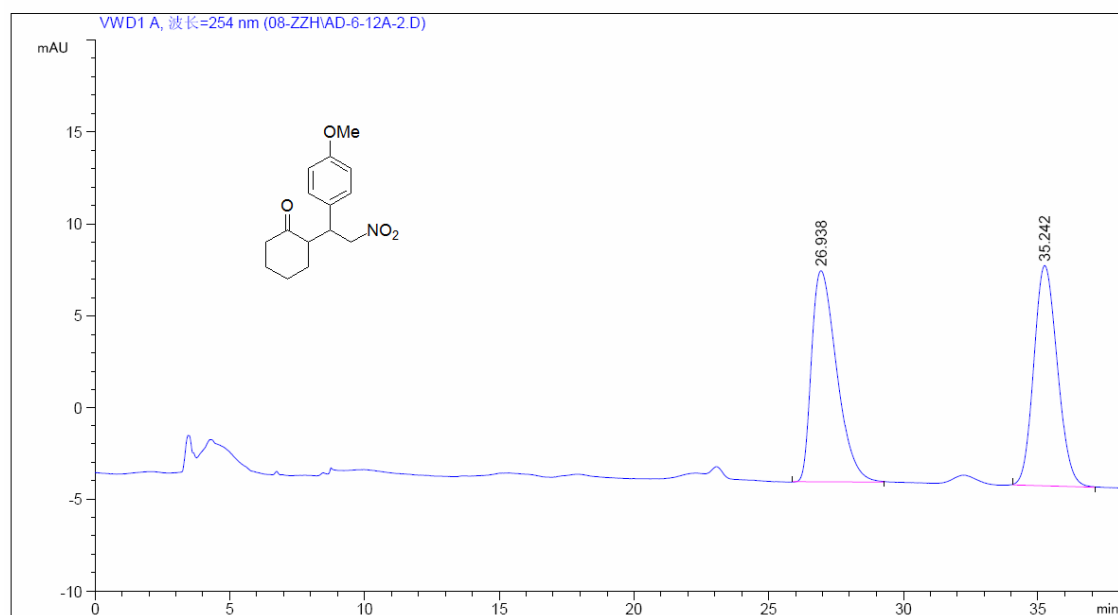

面积百分比报告

```
=====
排序      : 信号
乘积因子  : 1.0000
稀释因子  : 1.0000
内标使用乘积因子和稀释因子
=====
```

信号 1: VWD1 A, 波长=254 nm

| 峰 # | 保留时间 [min] | 类型 | 峰宽 [min] | 峰面积 mAU *s | 峰高 [mAU] | 峰面积 %   |
|-----|------------|----|----------|------------|----------|---------|
| 1   | 26.938     | BB | 1.0182   | 753.69202  | 11.53973 | 50.7034 |
| 2   | 35.242     | BB | 0.9553   | 732.77948  | 12.02916 | 49.2966 |

总量 : 1486.47150 23.56889

```

=====
操作者      :
仪器        : 仪器 2                      位置 : 样品瓶 1
进样日期    : 2008-8-8 9:23:39 下午
采集方法    : D:\CHEM32\2\METHODS\DEF_LC.M
最后修改    : 2008-8-8 9:22:04 下午
              (调用后修改)
分析方法    : D:\CHEM32\2\METHODS\DEF_LC.M
最后修改    : 2008-10-10 10:40:23 上午
              (调用后修改)
样品信息    : 10:90 1.0ml/min 254nm 42bar
=====
  
```

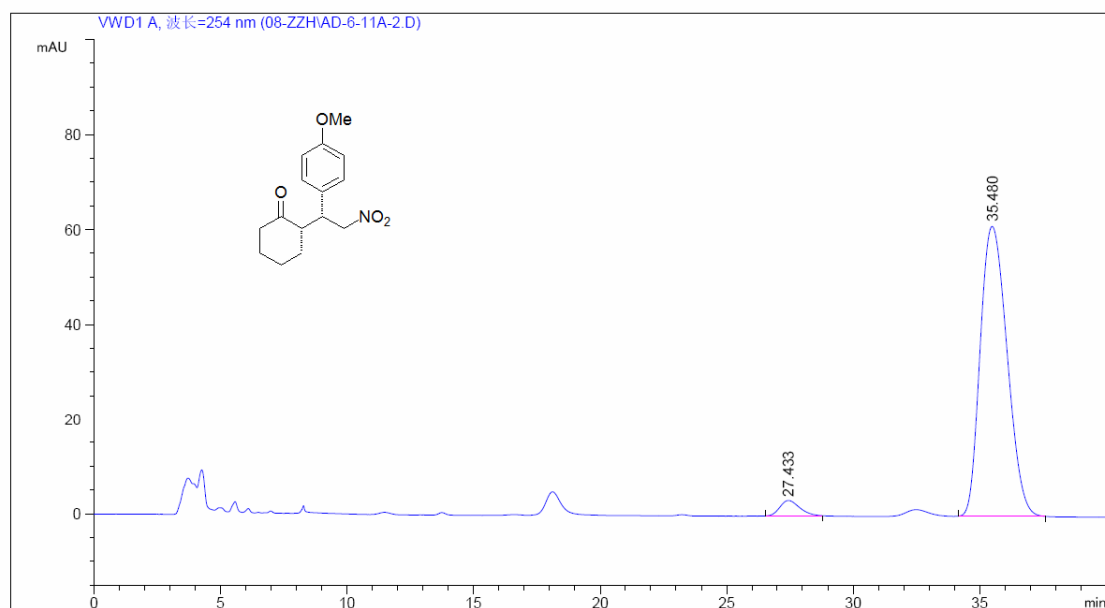

面积百分比报告

```

=====
排序      : 信号
乘积因子  : 1.0000
稀释因子  : 1.0000
内标使用乘积因子和稀释因子
=====
  
```

信号 1: VWD1 A, 波长=254 nm

| 峰 # | 保留时间 [min] | 类型 | 峰宽 [min] | 峰面积 mAU *s | 峰高 [mAU] | 峰面积 %   |
|-----|------------|----|----------|------------|----------|---------|
| 1   | 27.433     | BB | 0.7543   | 177.09096  | 3.23915  | 3.7756  |
| 2   | 35.480     | BB | 1.1796   | 4513.32129 | 61.17681 | 96.2244 |

总量 : 4690.41225 64.41596

```

=====
操作者      :
仪器        : 仪器 2                      位置 : 样品瓶 1
进样日期    : 2008-7-30 2:37:47 上午
采集方法    : D:\CHEM32\2\METHODS\DEF_LC.M
最后修改    : 2008-7-30 2:36:00 上午
              (调用后修改)
分析方法    : D:\CHEM32\2\METHODS\DEF_LC.M
最后修改    : 2008-10-9 7:35:50 下午
              (调用后修改)
样品信息    : 90:10   AS-H   1.0ml/min  254nm
=====
  
```

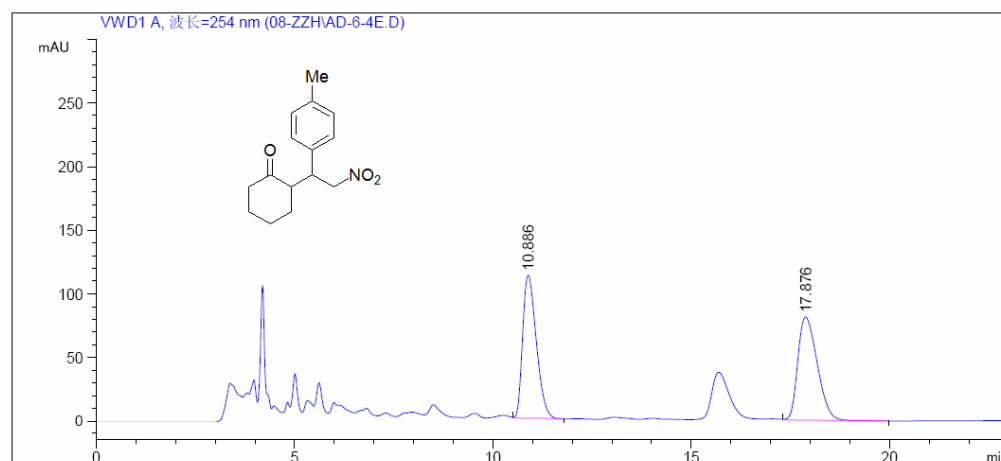

面积百分比报告

```

=====
排序      : 信号
乘积因子  : 1.0000
稀释因子  : 1.0000
内标使用乘积因子和稀释因子
=====
  
```

信号 1: VWD1 A, 波长=254 nm

| 峰 # | 保留时间 [min] | 类型 | 峰宽 [min] | 峰面积 mAU * s | 峰高 [mAU]  | 峰面积 %   |
|-----|------------|----|----------|-------------|-----------|---------|
| 1   | 10.886     | VB | 0.3760   | 2702.15186  | 112.61205 | 49.4082 |
| 2   | 17.876     | VB | 0.5432   | 2766.88306  | 81.19263  | 50.5918 |

总量 : 5469.03491 193.80469



```

=====
操作者      :
仪器        : 仪器 2                      位置 : 样品瓶 1
进样日期    : 2008-7-30 3:04:56 上午
采集方法    : D:\CHEM32\2\METHODS\DEF_LC.M
最后修改    : 2008-7-30 3:02:05 上午
              (调用后修改)
分析方法    : D:\CHEM32\2\METHODS\DEF_LC.M
最后修改    : 2008-10-9 11:09:23 上午
              (调用后修改)
样品信息    : 90:10   AS-H  1.0ml/min  254nm
=====
  
```

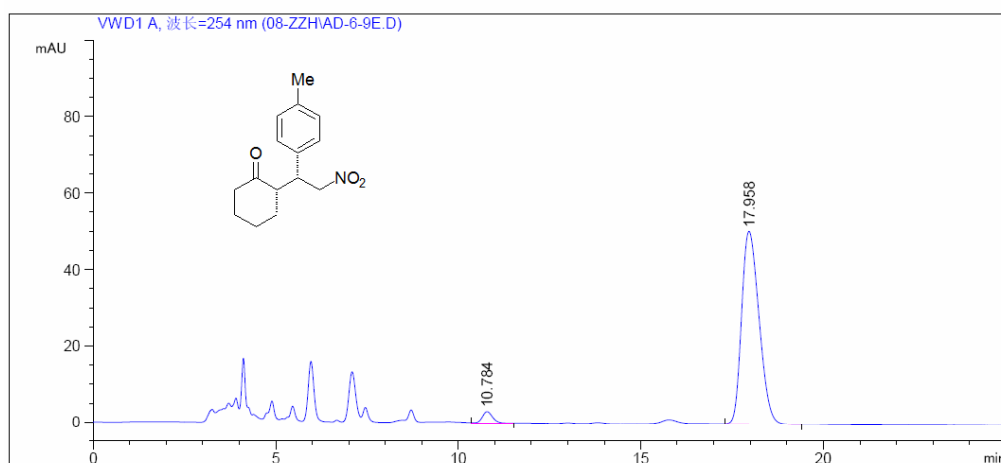

面积百分比报告

```

=====
排序      :      信号
乘积因子  :      1.0000
稀释因子  :      1.0000
内标使用乘积因子和稀释因子
=====
  
```

信号 1: VWD1 A, 波长=254 nm

| 峰 # | 保留时间 [min] | 类型 | 峰宽 [min] | 峰面积 mAU *s | 峰高 [mAU] | 峰面积 %   |
|-----|------------|----|----------|------------|----------|---------|
| 1   | 10.784     | VB | 0.3072   | 60.68312   | 3.05772  | 3.4788  |
| 2   | 17.958     | BB | 0.5279   | 1683.70483 | 50.61489 | 96.5212 |

总量 : 1744.38795 53.67261

```
=====
操作者      :
仪器        : 仪器 2                      位置 : 样品瓶 1
进样日期    : 2008-9-12 6:57:26 下午
采集方法    : D:\CHEM32\2\METHODS\DEF_LC.M
最后修改    : 2008-9-12 6:45:27 下午
              (调用后修改)
分析方法    : D:\CHEM32\2\METHODS\DEF_LC.M
最后修改    : 2008-10-9 6:47:17 下午
              (调用后修改)
样品信息    : 2:98 AS-H 1ml/min 254nm
=====
```

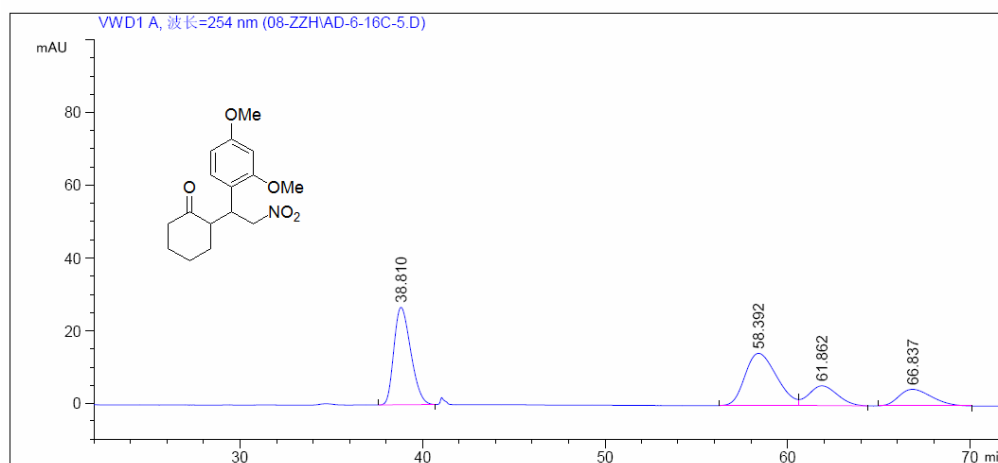

面积百分比报告

```
=====
排序      :      信号
乘积因子  :      1.0000
稀释因子  :      1.0000
内标使用乘积因子和稀释因子
=====
```

信号 1: VWD1 A, 波长=254 nm

| 峰 # | 保留时间 [min] | 类型 | 峰宽 [min] | 峰面积 mAU *s | 峰高 [mAU] | 峰面积 %   |
|-----|------------|----|----------|------------|----------|---------|
| 1   | 38.810     | BB | 1.0096   | 1722.99390 | 26.78585 | 37.1851 |
| 2   | 58.392     | BV | 1.8364   | 1732.64331 | 14.38280 | 37.3933 |
| 3   | 61.862     | VB | 1.5925   | 601.19330  | 5.50092  | 12.9747 |
| 4   | 66.837     | BB | 1.5451   | 576.73450  | 4.58821  | 12.4469 |

总量 : 4633.56500 51.25778

\*\*\* 报告结束 \*\*\*

```

=====
操作者      :
仪器        : 仪器 2                      位置 : 样品瓶 1
进样日期    : 2008-9-12 8:12:22 下午
采集方法    : D:\CHEM32\2\METHODS\DEF_LC.M
最后修改    : 2008-9-12 8:10:55 下午
              (调用后修改)
分析方法    : D:\CHEM32\2\METHODS\DEF_LC.M
最后修改    : 2008-10-9 6:54:25 下午
              (调用后修改)
样品信息    : 2:98 AS-H 1ml/min  254nm
=====
  
```

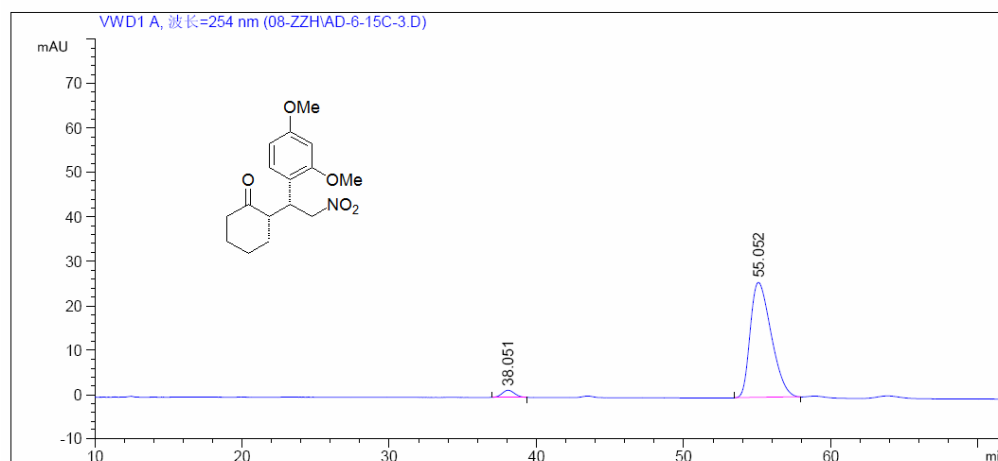

面积百分比报告

```

=====
排序      :      信号
乘积因子  :      1.0000
稀释因子  :      1.0000
内标使用乘积因子和稀释因子
=====
  
```

信号 1: VWD1 A, 波长=254 nm

| 峰 # | 保留时间 [min] | 类型 | 峰宽 [min] | 峰面积 mAU * s | 峰高 [mAU] | 峰面积 %   |
|-----|------------|----|----------|-------------|----------|---------|
| 1   | 38.051     | BB | 0.7010   | 93.29793    | 1.59235  | 3.5160  |
| 2   | 55.052     | BB | 1.4675   | 2560.25269  | 25.87380 | 96.4840 |

总量 : 2653.55061 27.46616

\*\*\* 报告结束 \*\*\*

```

=====
操作者      :
仪器        : 仪器 2                      位置 : 样品瓶 1
进样日期    : 2008-10-8 7:00:41 下午
采集方法    : D:\CHEM32\2\METHODS\DEF_LC.M
最后修改    : 2008-10-8 6:55:36 下午
              (调用后修改)
分析方法    : D:\CHEM32\2\METHODS\DEF_LC.M
最后修改    : 2008-10-8 8:09:42 下午
              (调用后修改)
样品信息    : 90/10  AD-H  0.5ml /min 254nm
=====
  
```

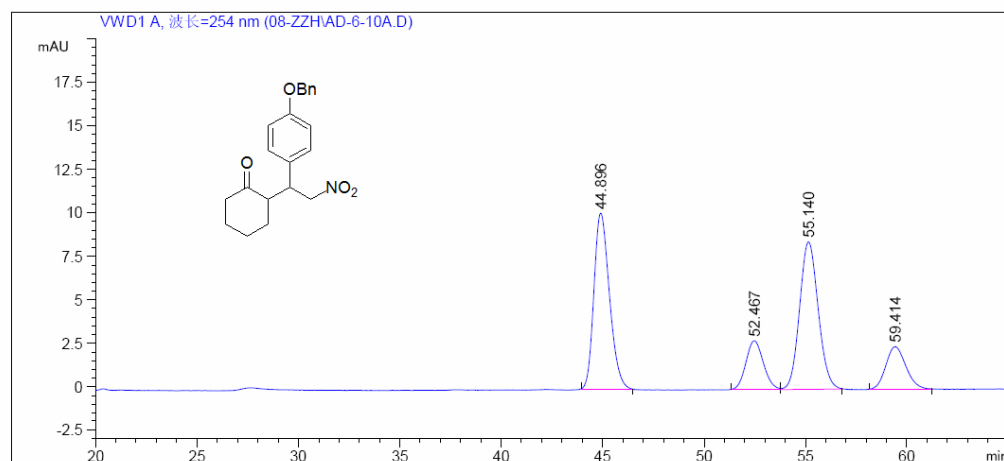

面积百分比报告

```

=====
排序      :      信号
乘积因子  :      1.0000
稀释因子  :      1.0000
内标使用乘积因子和稀释因子
=====
  
```

信号 1: VWD1 A, 波长=254 nm

| 峰 # | 保留时间 [min] | 类型 | 峰宽 [min] | 峰面积 mAU *s | 峰高 [mAU] | 峰面积 %   |
|-----|------------|----|----------|------------|----------|---------|
| 1   | 44.896     | BB | 0.8231   | 543.06714  | 10.13670 | 38.1542 |
| 2   | 52.467     | BV | 0.9324   | 168.40962  | 2.80899  | 11.8319 |
| 3   | 55.140     | VB | 0.9912   | 542.57703  | 8.47836  | 38.1198 |
| 4   | 59.414     | BB | 1.0750   | 169.29428  | 2.44721  | 11.8941 |

总量 : 1423.34807 23.87125

\*\*\* 报告结束 \*\*\*

```
=====
操作者      :
仪器        : 仪器 2                      位置 : 样品瓶 1
进样日期    : 2008-10-8 8:08:10 下午
采集方法    : D:\CHEM32\2\METHODS\DEF_LC.M
最后修改    : 2008-10-8 8:06:27 下午
              (调用后修改)
分析方法    : D:\CHEM32\2\METHODS\DEF_LC.M
最后修改    : 2008-10-8 9:30:05 下午
              (调用后修改)
样品信息    : 90/10  AD-H  0.5ml /min 254nm
=====
```

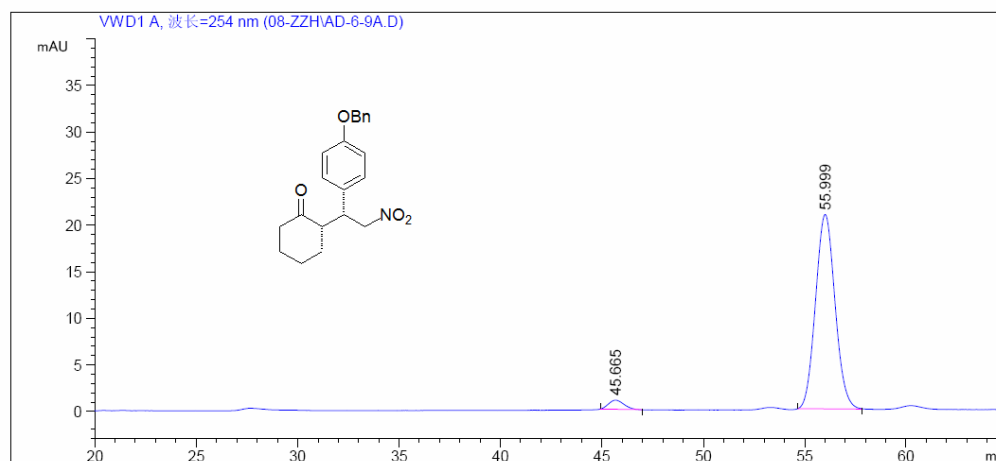

=====  
面积百分比报告  
=====

```
排序      :      信号
乘积因子   :      1.0000
稀释因子   :      1.0000
内标使用乘积因子和稀释因子
```

信号 1: VWD1 A, 波长=254 nm

| 峰 # | 保留时间 [min] | 类型 | 峰宽 [min] | 峰面积 mAU *s | 峰高 [mAU] | 峰面积 %   |
|-----|------------|----|----------|------------|----------|---------|
| 1   | 45.665     | BB | 0.8388   | 55.64682   | 1.01310  | 3.8271  |
| 2   | 55.999     | BB | 1.0428   | 1398.36389 | 20.89658 | 96.1729 |

总量 : 1454.01071 21.90968

=====  
\*\*\* 报告结束 \*\*\*  
=====

```

=====
操作者      :
仪器        : 仪器 2                      位置 : 样品瓶 1
进样日期    : 2008-9-11 3:34:56 下午
采集方法    : D:\CHEM32\2\METHODS\DEF_LC.M
最后修改    : 2008-9-11 3:29:09 下午
              (调用后修改)
分析方法    : D:\CHEM32\2\METHODS\DEF_LC.M
最后修改    : 2008-10-9 5:44:01 下午
              (调用后修改)
样品信息    : 85:25 0.5ml/min 254nm AD-H
=====
  
```

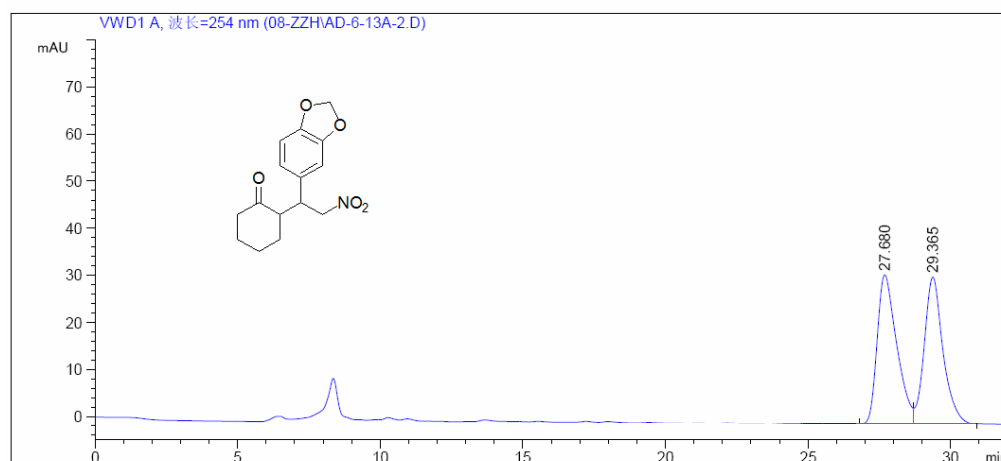

面积百分比报告

```

=====
排序      : 信号
乘积因子  : 1.0000
稀释因子  : 1.0000
内标使用乘积因子和稀释因子
=====
  
```

信号 1: VWD1 A, 波长=254 nm

| 峰 # | 保留时间 [min] | 类型 | 峰宽 [min] | 峰面积 mAU    | 峰高 [mAU] | 峰面积 %   |
|-----|------------|----|----------|------------|----------|---------|
| 1   | 27.680     | BV | 0.7038   | 1513.94519 | 31.72317 | 51.3355 |
| 2   | 29.365     | VB | 0.6884   | 1435.17346 | 31.26842 | 48.6645 |

总量 : 2949.11865 62.99159

\*\*\* 报告结束 \*\*\*

```

=====
操作者      :
仪器        : 仪器 2                      位置 : 样品瓶 1
进样日期    : 2008-9-11 4:10:56 下午
采集方法    : D:\CHEM32\2\METHODS\DEF_LC.M
最后修改    : 2008-9-11 4:10:12 下午
              (调用后修改)
分析方法    : D:\CHEM32\2\METHODS\DEF_LC.M
最后修改    : 2008-10-9 5:37:12 下午
              (调用后修改)
样品信息    : 85:25   0.5ml/min   254nm   AD-H
=====
  
```

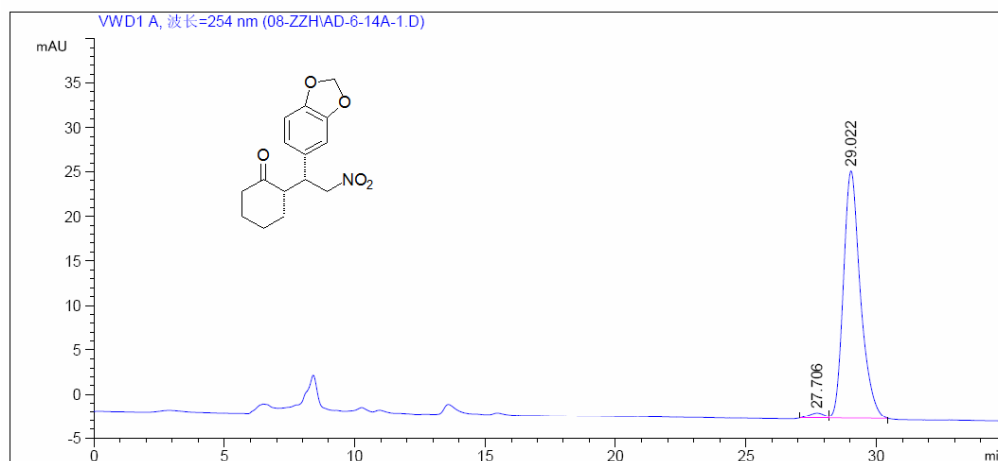

面积百分比报告

```

=====
排序      :      信号
乘积因子  :      1.0000
稀释因子  :      1.0000
内标使用乘积因子和稀释因子
  
```

信号 1: VWD1 A, 波长=254 nm

| 峰 # | 保留时间 [min] | 类型 | 峰宽 [min] | 峰面积 mAU *s | 峰高 [mAU]   | 峰面积 %   |
|-----|------------|----|----------|------------|------------|---------|
| 1   | 27.706     | BV | 0.4989   | 26.86157   | 6.41230e-1 | 2.0690  |
| 2   | 29.022     | VB | 0.6890   | 1271.41919 | 27.89341   | 97.9310 |

总量 : 1298.28076 28.53464

\*\*\* 报告结束 \*\*\*

```

=====
操作者      :
仪器        : 仪器 2                      位置 : 样品瓶 1
进样日期    : 2008-7-29 5:37:51 下午
采集方法    : D:\CHEM32\2\METHODS\DEF_LC.M
最后修改    : 2008-7-29 5:36:45 下午
              (调用后修改)
分析方法    : D:\CHEM32\2\METHODS\DEF_LC.M
最后修改    : 2008-10-9 7:37:51 下午
              (调用后修改)
样品信息    : 75:25    AS-H    1ml/min    238nm
=====
  
```

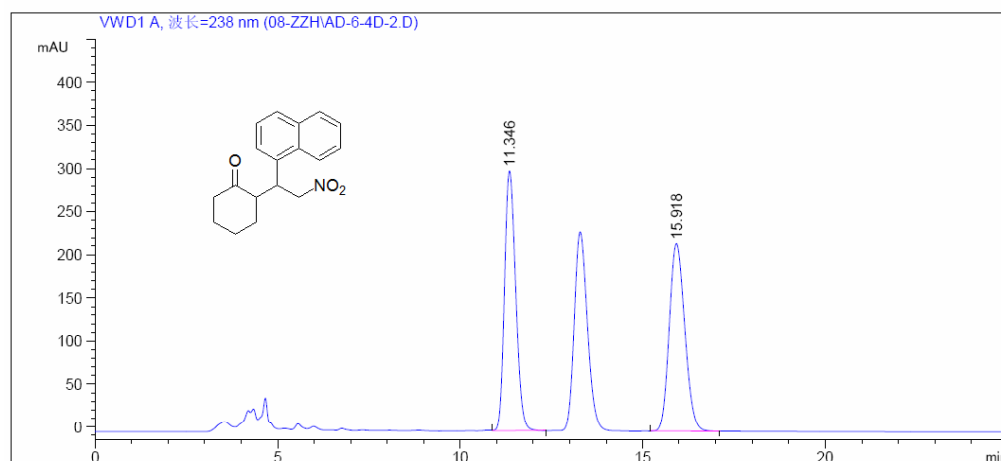

面积百分比报告

```

=====
排序      :      信号
乘积因子  :      1.0000
稀释因子  :      1.0000
内标使用乘积因子和稀释因子
=====
  
```

信号 1: VWD1 A, 波长=238 nm

| 峰 # | 保留时间 [min] | 类型 | 峰宽 [min] | 峰面积 mAU * s | 峰高 [mAU]  | 峰面积 %   |
|-----|------------|----|----------|-------------|-----------|---------|
| 1   | 11.346     | VB | 0.3328   | 6433.50293  | 302.21408 | 49.7652 |
| 2   | 15.918     | VV | 0.4691   | 6494.20557  | 218.44804 | 50.2348 |

总量 : 1.29277e4 520.66212



```
=====
操作者      :
仪器        : 仪器 2                      位置 : 样品瓶 1
进样日期    : 2008-7-29 4:32:33 下午
采集方法    : D:\CHEM32\2\METHODS\DEF_LC.M
最后修改    : 2008-7-29 4:28:49 下午
              (调用后修改)
分析方法    : D:\CHEM32\2\METHODS\DEF_LC.M
最后修改    : 2008-10-6 4:25:17 下午
              (调用后修改)
样品信息    : 75:25   AS-H   1ml/min  238nm
=====
```

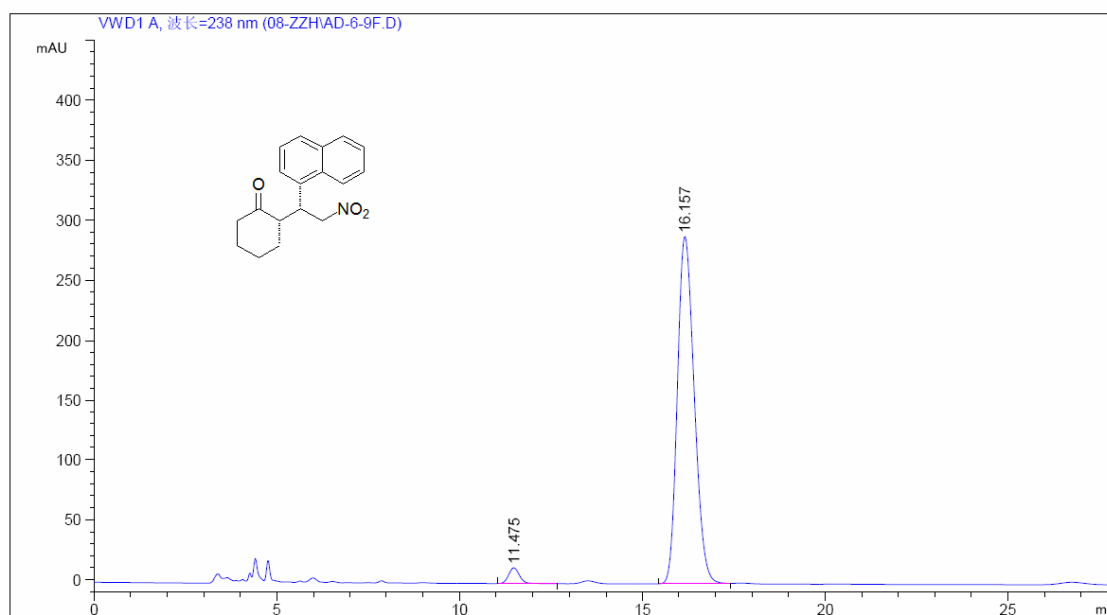

面积百分比报告

```
=====
排序      :      信号
乘积因子  :      1.0000
稀释因子  :      1.0000
内标使用乘积因子和稀释因子
=====
```

信号 1: VWD1 A, 波长=238 nm

| 峰 # | 保留时间 [min] | 类型 | 峰宽 [min] | 峰面积 mAU *s | 峰高 [mAU]  | 峰面积 %   |
|-----|------------|----|----------|------------|-----------|---------|
| 1   | 11.475     | BB | 0.3266   | 275.73618  | 13.12440  | 2.8760  |
| 2   | 16.157     | BV | 0.5031   | 9311.61719 | 289.68842 | 97.1240 |

总量 : 9587.35336 302.81282

```
=====
操作者      :
仪器        : 仪器 2                      位置 : 样品瓶 1
进样日期    : 2008-10-8 2:14:02 下午
采集方法    : D:\CHEM32\2\METHODS\DEF_LC.M
最后修改    : 2008-10-8 2:12:09 下午
              (调用后修改)
分析方法    : D:\CHEM32\2\METHODS\DEF_LC.M
最后修改    : 2008-10-9 5:54:18 下午
              (调用后修改)
样品信息    : 98/2   AD-H   0.7ml /min 254nm
=====
```

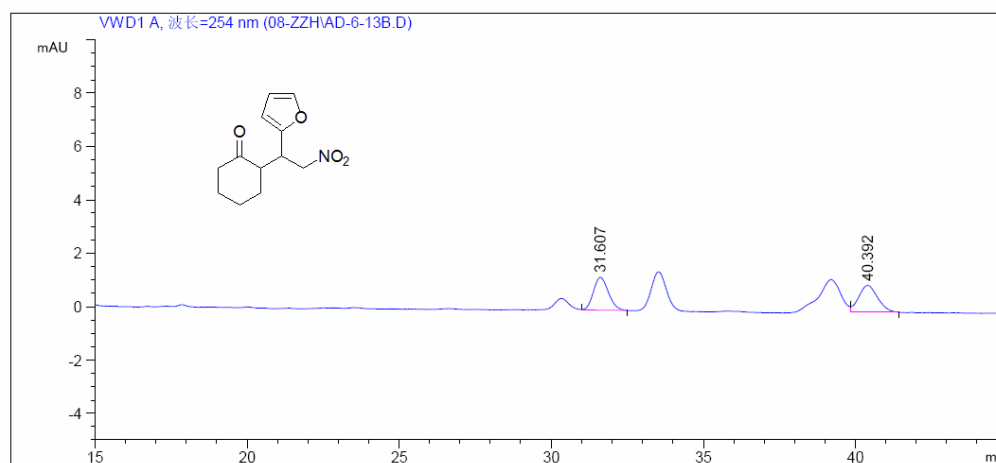

=====  
面积百分比报告  
=====

```
排序      :      信号
乘积因子   :      1.0000
稀释因子   :      1.0000
内标使用乘积因子和稀释因子
```

信号 1: VWD1 A, 波长=254 nm

| 峰 # | 保留时间 [min] | 类型 | 峰宽 [min] | 峰面积 mAU * s | 峰高 [mAU] | 峰面积 %   |
|-----|------------|----|----------|-------------|----------|---------|
| 1   | 31.607     | VB | 0.5212   | 43.03622    | 1.24073  | 49.0076 |
| 2   | 40.392     | VB | 0.6359   | 44.77924    | 1.01719  | 50.9924 |

总量 : 87.81546 2.25792

=====  
\*\*\* 报告结束 \*\*\*  
=====

```
=====
操作者      :
仪器        : 仪器 2                      位置 : 样品瓶 1
进样日期    : 2008-10-8 1:26:16 下午
采集方法    : D:\CHEM32\2\METHODS\DEF_LC.M
最后修改    : 2008-10-8 1:17:44 下午
              (调用后修改)
分析方法    : D:\CHEM32\2\METHODS\DEF_LC.M
最后修改    : 2008-10-9 6:00:09 下午
              (调用后修改)
样品信息    : 98/2   AD-H   0.7ml /min 254nm
=====
```

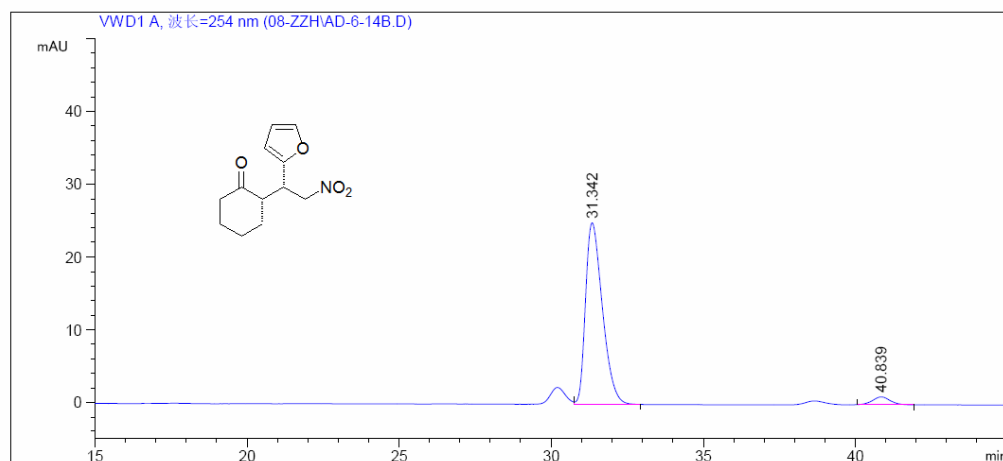

=====  
面积百分比报告  
=====

```
排序      :      信号
乘积因子  :      1.0000
稀释因子  :      1.0000
内标使用乘积因子和稀释因子
```

信号 1: VWD1 A, 波长=254 nm

| 峰 # | 保留时间 [min] | 类型 | 峰宽 [min] | 峰面积 mAU *s | 峰高 [mAU] | 峰面积 %   |
|-----|------------|----|----------|------------|----------|---------|
| 1   | 31.342     | VB | 0.5905   | 963.16711  | 24.93131 | 95.5518 |
| 2   | 40.839     | BB | 0.6020   | 44.83764   | 1.09055  | 4.4482  |

总量 : 1008.00476 26.02186

=====  
\*\*\* 报告结束 \*\*\*  
=====

```

=====
操作者      :
仪器        : 仪器 2                      位置 : 样品瓶 1
进样日期    : 2008-10-7 6:04:40 下午
采集方法    : D:\CHEM32\2\METHODS\DEF_LC.M
最后修改    : 2008-10-7 5:56:58 下午
              (调用后修改)
分析方法    : D:\CHEM32\2\METHODS\DEF_LC.M
最后修改    : 2008-10-10 11:18:05 上午
              (调用后修改)
样品信息    : 98/2      AD-H      0.5ml /min 254nm
=====
  
```

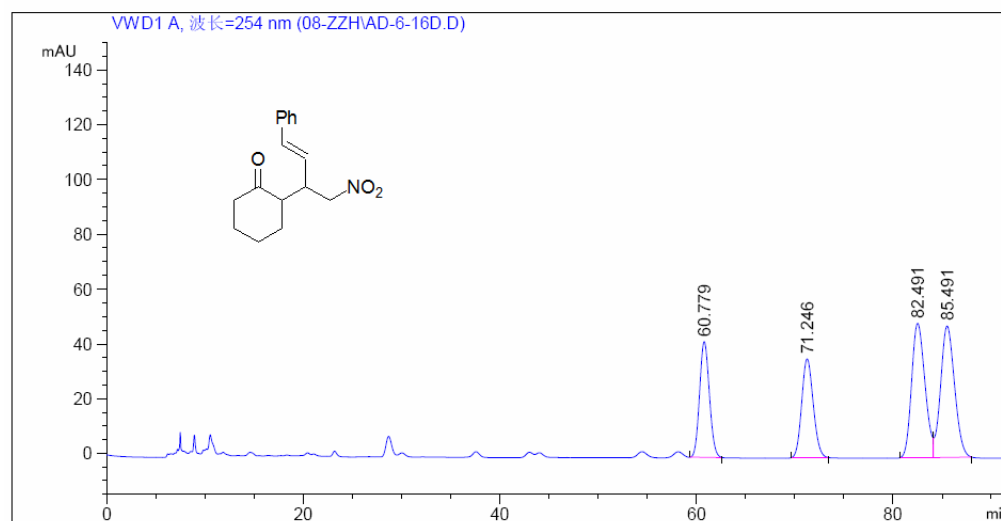

面积百分比报告

```

=====
排序      :      信号
乘积因子  :      1.0000
稀释因子  :      1.0000
内标使用乘积因子和稀释因子
=====
  
```

信号 1: VWD1 A, 波长=254 nm

| 峰 # | 保留时间 [min] | 类型 | 峰宽 [min] | 峰面积 mAU *s | 峰高 [mAU] | 峰面积 %   |
|-----|------------|----|----------|------------|----------|---------|
| 1   | 60.779     | VB | 1.0667   | 2939.23608 | 42.31095 | 19.2145 |
| 2   | 71.246     | BB | 1.2386   | 2955.61328 | 36.12009 | 19.3216 |
| 3   | 82.491     | BV | 1.4160   | 4651.79297 | 49.07371 | 30.4099 |
| 4   | 85.491     | VB | 1.4969   | 4750.31494 | 47.99303 | 31.0540 |

总量 : 1.52970e4 175.49778

\*\*\* 报告结束 \*\*\*

```
=====
操作者      :
仪器        : 仪器 2                      位置 : 样品瓶 1
进样日期    : 2008-10-7 8:11:36 下午
采集方法    : D:\CHEM32\2\METHODS\DEF_LC.M
最后修改    : 2008-10-7 7:58:44 下午
              (调用后修改)
分析方法    : D:\CHEM32\2\METHODS\DEF_LC.M
最后修改    : 2008-10-10 11:21:05 上午
              (调用后修改)
样品信息    : 99/1    AD-H    0.5ml /min 254nm
=====
```

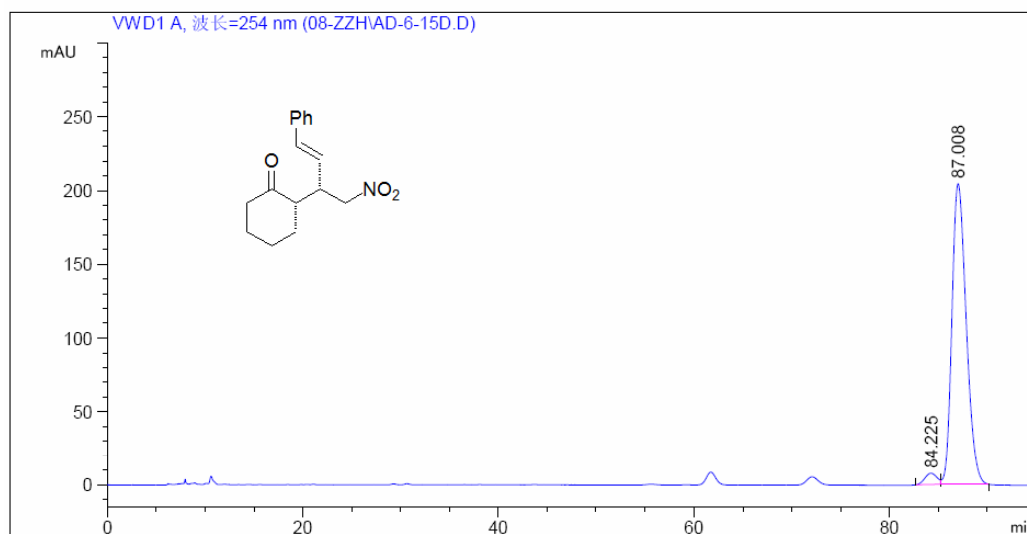

面积百分比报告

```
=====
排序      :      信号
乘积因子  :      1.0000
稀释因子  :      1.0000
内标使用乘积因子和稀释因子
=====
```

信号 1: VWD1 A, 波长=254 nm

| 峰 # | 保留时间 [min] | 类型 | 峰宽 [min] | 峰面积 mAU *s | 峰高 [mAU]  | 峰面积 %   |
|-----|------------|----|----------|------------|-----------|---------|
| 1   | 84.225     | BV | 1.0394   | 672.96466  | 7.80488   | 3.1299  |
| 2   | 87.008     | VB | 1.5560   | 2.08279e4  | 204.60893 | 96.8701 |

总量 : 2.15009e4 212.41381

\*\*\* 报告结束 \*\*\*

```

=====
操作者      :
仪器        : 仪器 2                      位置 : 样品瓶 1
进样日期    : 2008-10-21 7:52:26 下午
采集方法    : D:\CHEM32\2\METHODS\DEF_LC.M
最后修改    : 2008-10-21 7:46:31 下午
              (调用后修改)
分析方法    : D:\CHEM32\2\METHODS\DEF_LC.M
最后修改    : 2008-10-21 9:06:16 下午
              (调用后修改)
样品信息    : hex:iso98:2 0.5ml/min AD-H 254nm
=====
  
```

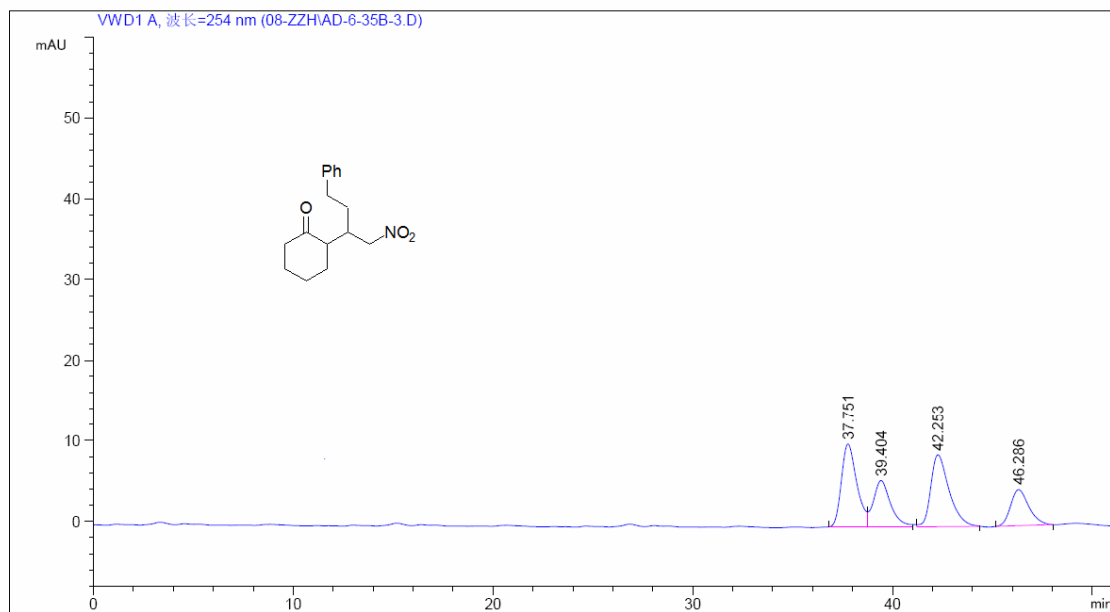

面积百分比报告

```

=====
排序      : 信号
乘积因子  : 1.0000
稀释因子  : 1.0000
内标使用乘积因子和稀释因子
=====
  
```

信号 1: VWD1 A, 波长=254 nm

| 峰 # | 保留时间 [min] | 类型 | 峰宽 [min] | 峰面积 mAU *s | 峰高 [mAU] | 峰面积 %   |
|-----|------------|----|----------|------------|----------|---------|
| 1   | 37.751     | BV | 0.8134   | 552.46796  | 10.27966 | 31.5845 |
| 2   | 39.404     | VB | 0.8945   | 345.51520  | 5.73944  | 19.7530 |
| 3   | 42.253     | BB | 0.9612   | 567.67847  | 8.88093  | 32.4541 |
| 4   | 46.286     | BB | 0.9692   | 283.51324  | 4.45719  | 16.2084 |

```

=====
操作者      :
仪器        : 仪器 2                      位置 : 样品瓶 1
进样日期    : 2008-10-21 8:48:22 下午
采集方法    : D:\CHEM32\2\METHODS\DEF_LC.M
最后修改    : 2008-10-21 8:45:23 下午
              (调用后修改)
分析方法    : D:\CHEM32\2\METHODS\DEF_LC.M
最后修改    : 2008-10-21 9:49:55 下午
              (调用后修改)
样品信息    : hex:iso98:2 0.5ml/min AD-H 254nm
=====
  
```

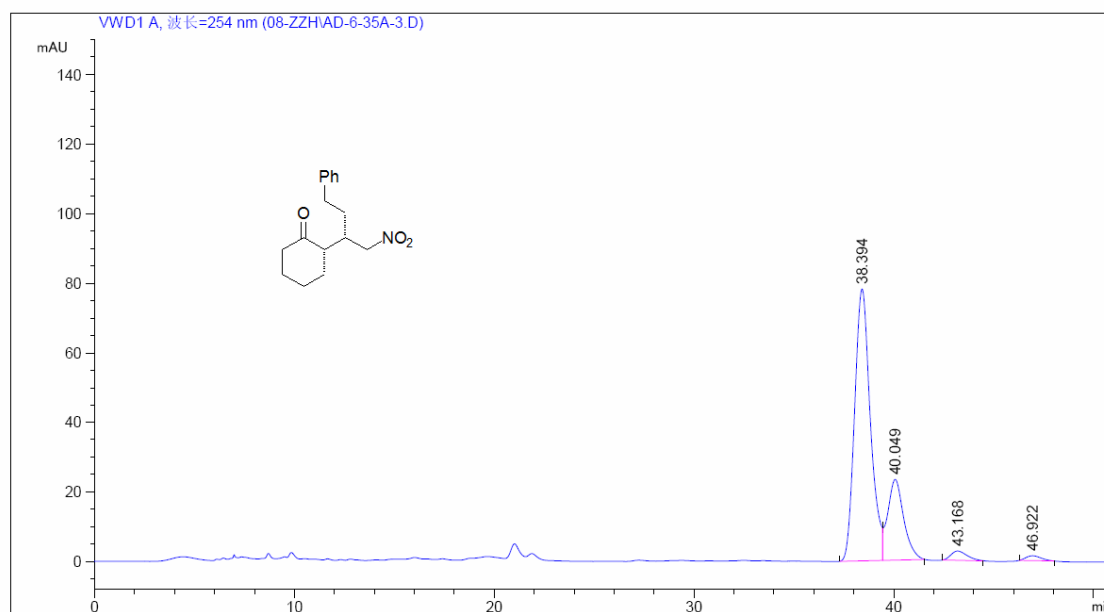

面积百分比报告

```

=====
排序      : 信号
乘积因子  : 1.0000
稀释因子  : 1.0000
内标使用乘积因子和稀释因子
=====
  
```

信号 1: VWD1 A, 波长=254 nm

| 峰 # | 保留时间 [min] | 类型 | 峰宽 [min] | 峰面积 mAU * s | 峰高 [mAU] | 峰面积 %   |
|-----|------------|----|----------|-------------|----------|---------|
| 1   | 38.394     | BV | 0.8340   | 4289.75391  | 78.33813 | 73.6955 |
| 2   | 40.049     | VB | 0.8254   | 1298.02856  | 23.21992 | 22.2994 |
| 3   | 43.168     | BB | 0.7704   | 153.03871   | 2.70051  | 2.6291  |
| 4   | 46.922     | BB | 0.6846   | 80.09606    | 1.46469  | 1.3760  |

```

=====
操作者      :
仪器        : 仪器 2                      位置 : 样品瓶 1
进样日期    : 2008-9-26 3:38:11 下午
采集方法    : D:\CHEM32\2\METHODS\DEF_LC.M
最后修改    : 2008-9-26 3:19:48 下午
              (调用后修改)
分析方法    : D:\CHEM32\2\METHODS\DEF_LC.M
最后修改    : 2008-10-9 6:59:31 下午
              (调用后修改)
样品信息    : Hex:i-Pr=85:15 1ml/min 220nm
=====
  
```

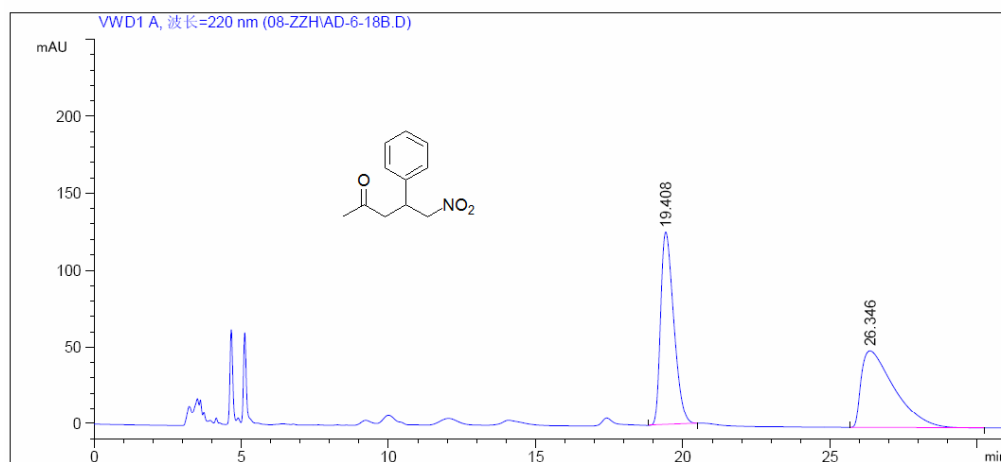

面积百分比报告

```

=====
排序      :      信号
乘积因子   :      1.0000
稀释因子   :      1.0000
内标使用乘积因子和稀释因子
=====
  
```

信号 1: VWD1 A, 波长=220 nm

| 峰 # | 保留时间 [min] | 类型 | 峰宽 [min] | 峰面积 mAU *s | 峰高 [mAU]  | 峰面积 %   |
|-----|------------|----|----------|------------|-----------|---------|
| 1   | 19.408     | BB | 0.4823   | 3908.32886 | 125.63995 | 49.7628 |
| 2   | 26.346     | BB | 1.1667   | 3945.59448 | 50.31645  | 50.2372 |

总量 : 7853.92334 175.95641

\*\*\* 报告结束 \*\*\*



```

=====
操作者      :
仪器        : 仪器 2                      位置 : 样品瓶 1
进样日期    : 2008-9-26 4:10:53 下午
采集方法    : D:\CHEM32\2\METHODS\DEF_LC.M
最后修改    : 2008-9-26 4:09:57 下午
              (调用后修改)
分析方法    : D:\CHEM32\2\METHODS\DEF_LC.M
最后修改    : 2008-10-9 6:59:31 下午
              (调用后修改)
样品信息    : Hex:i-Pr=85:15 1ml/min 220nm AS-H
=====
  
```

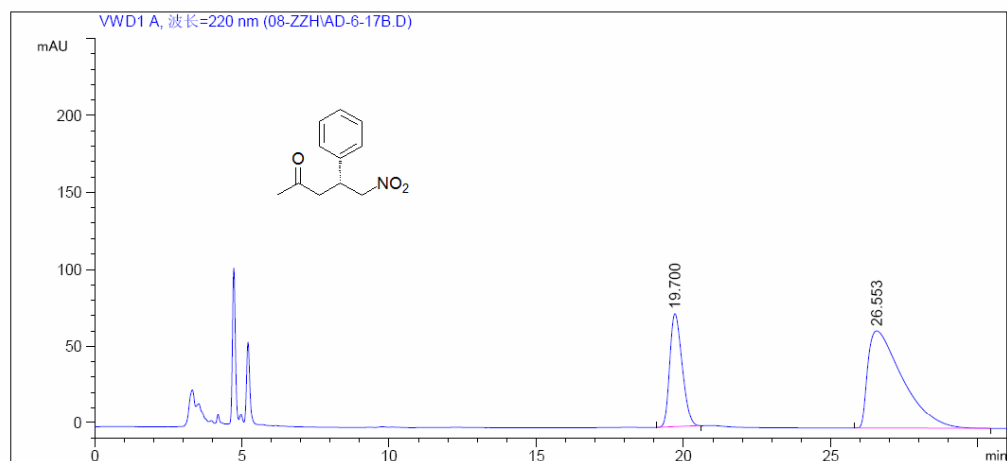

=====  
面积百分比报告  
=====

```

排序      :      信号
乘积因子  :      1.0000
稀释因子  :      1.0000
内标使用乘积因子和稀释因子
  
```

信号 1: VWD1 A, 波长=220 nm

| 峰 # | 保留时间 [min] | 类型 | 峰宽 [min] | 峰面积 mAU *s | 峰高 [mAU] | 峰面积 %   |
|-----|------------|----|----------|------------|----------|---------|
| 1   | 19.700     | BB | 0.4580   | 2174.73608 | 73.98475 | 29.3925 |
| 2   | 26.553     | BB | 1.1920   | 5224.21094 | 63.64580 | 70.6075 |

总量 : 7398.94702 137.63055

=====  
\*\*\* 报告结束 \*\*\*

```

=====
操作者      :
仪器        : 仪器 2                      位置 : 样品瓶 1
进样日期    : 2008-9-26 4:56:20 下午
采集方法    : D:\CHEM32\2\METHODS\DEF_LC.M
最后修改    : 2008-9-26 4:46:35 下午
              (调用后修改)
分析方法    : D:\CHEM32\2\METHODS\DEF_LC.M
最后修改    : 2008-10-9 6:56:48 下午
              (调用后修改)
样品信息    : Hex:i-Pr=95:5 1ml/min 220nm AD-H
=====
  
```

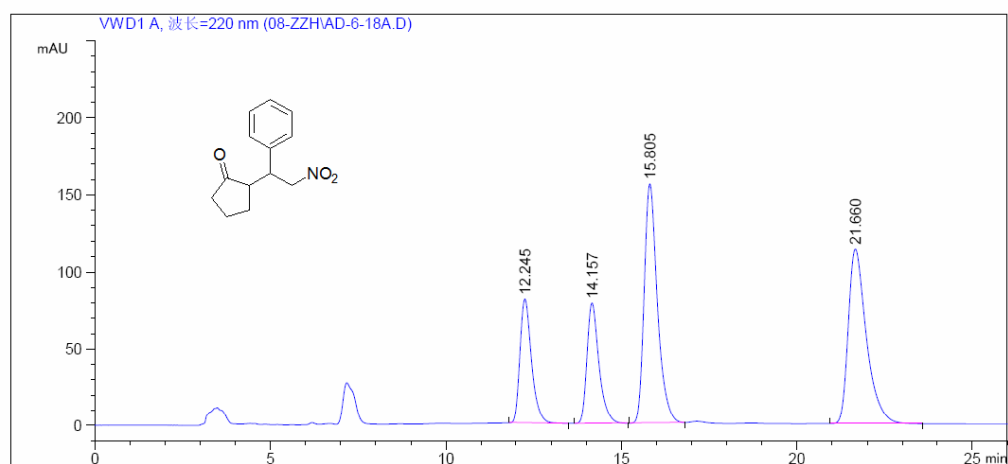

面积百分比报告

```

=====
排序      :      信号
乘积因子   :      1.0000
稀释因子   :      1.0000
内标使用乘积因子和稀释因子
=====
  
```

信号 1: VWD1 A, 波长=220 nm

| 峰 # | 保留时间 [min] | 类型 | 峰宽 [min] | 峰面积 mAU *s | 峰高 [mAU]  | 峰面积 %   |
|-----|------------|----|----------|------------|-----------|---------|
| 1   | 12.245     | BB | 0.3512   | 1859.00354 | 80.87421  | 15.6194 |
| 2   | 14.157     | BB | 0.3593   | 1872.12354 | 78.62105  | 15.7297 |
| 3   | 15.805     | BB | 0.3954   | 4068.77148 | 155.57481 | 34.1860 |
| 4   | 21.660     | BB | 0.5444   | 4101.95752 | 113.77625 | 34.4649 |

总量 : 1.19019e4 428.84633

\*\*\* 报告结束 \*\*\*

```
=====
操作者      :
仪器        : 仪器 2                      位置 : 样品瓶 1
进样日期    : 2008-9-26 5:24:40 下午
采集方法    : D:\CHEM32\2\METHODS\DEF_LC.M
最后修改    : 2008-9-26 5:23:04 下午
              (调用后修改)
分析方法    : D:\CHEM32\2\METHODS\DEF_LC.M
最后修改    : 2008-10-9 6:56:48 下午
              (调用后修改)
样品信息    : Hex:i-Pr=95:5 1ml/min 220nm AD-H
=====
```

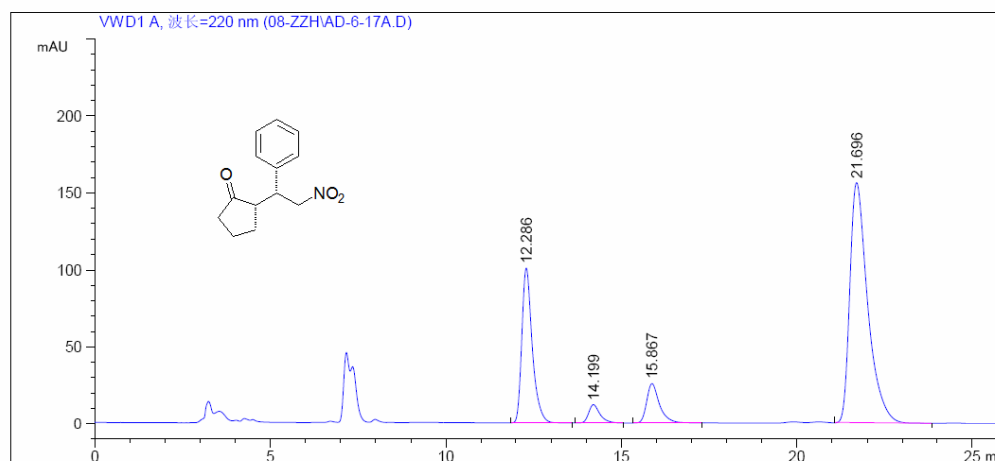

=====  
面积百分比报告  
=====

```
排序      :      信号
乘积因子  :      1.0000
稀释因子  :      1.0000
内标使用乘积因子和稀释因子
```

信号 1: VWD1 A, 波长=220 nm

| 峰 # | 保留时间 [min] | 类型 | 峰宽 [min] | 峰面积 mAU *s | 峰高 [mAU]  | 峰面积 %   |
|-----|------------|----|----------|------------|-----------|---------|
| 1   | 12.286     | BB | 0.3126   | 2078.43604 | 100.49352 | 24.4298 |
| 2   | 14.199     | BB | 0.3356   | 264.47977  | 11.87151  | 3.1087  |
| 3   | 15.867     | BB | 0.3791   | 645.43170  | 25.55637  | 7.5864  |
| 4   | 21.696     | BB | 0.5322   | 5519.43750 | 155.98143 | 64.8751 |

总量 : 8507.78500 293.90283

=====  
\*\*\* 报告结束 \*\*\*
